# Supplementary material for: Anesthetic Exposure During Childhood and Neurodevelopmental Outcomes: A Systematic Review and Meta-analysis
Source: PubMed Central journal article supplement (PMC9204549; doi:10.1001/jamanetworkopen.2022.17427), 2022-06-16

## Supplemental Online Content

Reighard C, Junaid S, Jackson WM, et al. Anesthetic exposure during childhood and neurodevelopmental outcomes: a systematic review and meta-analysis. *JAMA Netw Open*. 2022;5(6):e2217427. doi:10.1001/jamanetworkopen.2022.17427

### **eMethods.** Literature Search Strategies

**eTable 1.** All Domains and Subdomains Evaluated in Studies of Potential Neurotoxic Effects of Anesthetic

**eTable 2.** All Outcomes Evaluated in Studies of Potential Neurotoxic Effects of Anesthetic and Their Associated Neurodevelopmental Domain and Subdomain Classifications

**eTable 3.** All Neurodevelopmental Domain and Subdomains and the Classification of Outcomes into These Domains and Subdomains

**eTable 4.** Outcomes From Each of the 108 Reviewed Studies

**eTable 5.** Characteristics of All 108 Reviewed Studies

**eTable 6.** Outcomes of Duplicate Studies or Studies That Did Not Report Outcome Scores That Could Be Evaluated

**eTable 7.** Exposure Data Used From Each of the 31 Included Studies

**eTable 8.** Cochrane Risk of Bias Assessment in Randomized Trial

**eTable 9.** Risk of Bias In Nonrandomized Studies or Interventions (ROBINS-I) Assessment of Eligible Nonrandomized Studies

**eFigure 1.** Domain-Specific Meta-analysis of Scores After Single With Possible Multiple Exposure to Surgery and Anesthesia

**eFigure 2.** Meta-analysis of Hazard and Risk of Clinical Diagnoses and Symptoms After Single With Possible Multiple Exposure to Surgery and Anesthesia

**eFigure 3.** Domain-Specific Meta-analysis of Subdomain Scores and Hazard of ADHD After Single With Possible Multiple Exposure to Surgery and Anesthesia

**eFigure 4.** Domain-Specific Meta-analysis of Scores and Hazard of Clinical Diagnoses and Symptoms After Single Exposure to Surgery and Anesthesia

**eFigure 5.** Domain-Specific Meta-analysis of Subdomain Scores and Hazard of ADHD After Single Exposure to Surgery and Anesthesia

**eFigure 6.** Domain-Specific Meta-analysis of Scores and Hazard of Clinical Diagnoses and Symptoms After Multiple Exposure to Surgery and Anesthesia

**eFigure 7.** Domain-Specific Meta-analysis of Subdomain Scores and Hazard of ADHD After Multiple Exposure to Surgery and Anesthesia

**eFigure 8.** ROBINS-I Risk of Bias Assessment Figure

**eFigure 9.** Funnel Plot for Studies of Any Exposure to Surgery and Anesthesia

This supplemental material has been provided by the authors to give readers additional information about their work.

## **eMethods.** Literature Search Strategies

### ***Pubmed***

((((child OR children OR childhood OR infant OR infants OR infancy OR adolescent OR adolescents OR adolescence OR newborn OR Newborns OR neonate OR neonates OR babies OR toddlers OR paediatric OR pediatric)) AND ((Anesthesia OR Anaesthesia OR Anesthetics OR Anaesthetics OR General Anesthesia OR General Anaesthesia OR General Anesthetics OR General Anaesthetics OR Anesthetic OR Anaesthetic OR Anesthetic exposure OR Anaesthetic exposure OR Anesthetic agents OR Anaesthetic agents OR intravenous anesthesia OR intravenous anaesthesia OR intravenous anaesthetics OR intravenous anesthetics OR volatile anaesthetics OR volatile anesthetics OR inhalation anesthesia OR inhalation anaesthesia OR sevoflurane OR isoflurane OR desflurane OR nitrous oxide OR halothane OR propofol OR thiomebumal OR ketamine OR GABA-A receptor agonist OR NMDA-receptor antagonist OR Adrenergic Alpha-2 receptor agonist OR benzodiazepine OR midazolam OR clonidine OR dexmedetomidine))) AND ((Cognition OR Cognitive outcome OR Cognitive outcomes OR Cognitive defect OR Cognitive defects OR Cognitive deficit OR Cognitive deficits OR Cognitive disorder OR Cognition disorders OR Cognitive impairment OR Cognitive impairments OR Neurodevelopment OR Neurodevelopmental outcome OR Neurodevelopmental outcomes OR child behaviour OR child behaviours OR Developmental disability OR Developmental disabilities OR Developmental disorder OR Developmental disorders OR Developmental delay disorder OR Developmental delay disorders OR behavioural impairment OR behavioural impairments OR behavioural change OR behavioural changes)))) NOT ((animals[mh] NOT humans[mh]))

## **OVID Medline**

1. (child of impaired parents or children or single parent child or child, preschool or child,preschool or pre-school child or pre-school going children or pre-schooler or pre-schoolers or preschool child institution or preschooler or infancy or Infant or Baby or Childhood or child,school or school boy or school children or school girl or school-going boy or school-going boys or school-going child or school-going children or school-going girl or school-going girls or schoolboy or schoolboys or schoolchild or schoolchildren or schoolgirl or schoolgirls or schoolgoing child or schoolgoing children or animals, newborn or child,newborn or full term infant or human neonate or human newborn or infant, newborn or neonatal animal or neonate or neonate animal or neonates or newborn animal or newborn baby or newborn child or newborn infant or newly born baby or newly born child or newly born infant or Toddlers or adolescent, institutionalized or institutionalised adolescent or institutionalized adolescent or teenager or Teenage).mp. [mp=title, abstract, original title, name of substance word, subject heading word, floating sub-heading word, keyword heading word, organism supplementary concept word, protocol supplementary concept word, rare disease supplementary concept word, unique identifier, synonyms]

2. exp Child/

3. exp Preschool Child/

4. exp Infant/

5. exp Newborn/

6. exp Adolescent/

7. exp Adolescence/

8. 1 or 2 or 3 or 4 or 5 or 6 or 7

9. exp General an?esthesia/

10. exp Intravenous an?esthesia/

11. exp Inhalation An?esthesia/

12. exp anesthetic agent/

13. exp Isoflurane/

14. exp Sevoflurane/

15. exp Desflurane/

16. exp Halothane/

17. exp Nitrous Oxide/

18. exp Propofol/

19. exp Thiopental/

20. exp Ketamine/

21. exp Clonidine/

22. exp Benzodiazepine/

23. exp Dexmedetomidine/

24. (Anaesthesia or anaesthesia, intratracheal or anaesthesia, auto or anaesthetic action or anesthesia, intratracheal or anesthesia,auto or anesthetic action or anesthetization or animal anaesthesia or animal anesthesia or autoanaesthesia or autoanesthesia or drop mask anaesthesia or drop mask anesthesia or narcosis or neuroanaesthesia or neuroanesthesia or short anaesthesia or short anesthesia or short duration or anaesthesia or short duration anesthesia or anaesthesia, general or anaesthesia,general or anesthesia, general or anesthesia,general or general anaesthesia or anaesthesia,child or anaesthesia,paediatric or anesthesia,child or anesthesia,pediatric or child anaesthesia or child anesthesia or paediatric anaesthesia or anaesthesia,intravenous or anaesthesia,local,intravenous or anesthesia, intravenous or anesthesia,intravenous or anesthesia,local,intravenous or intravenous anaesthesia or intravenous local anaesthesia or intravenous local anesthesia or local anaesthesia,intravenous or local anesthesia,intravenous or anaesthesia, closed-circuit or anaesthesia, inhalation or anaesthesia,closed circuit or anaesthesia,inhalation or anaesthetic system,closed or anesthesia, closed-circuit or anesthesia, inhalation or anesthesia,closed circuit or anesthesia,inhalation or anesthetic system,closed or closed anaesthetic circuit or closed anaesthetic system or closed anesthetic circuit or closed anesthetic system or closed circuit anaesthesia or closed circuit anesthesia or inhalation anaesthesia or anaesthetic or anaesthetic agent or anaesthetic drug or anaesthetics or anaesthetics, combined or anaesthetics, dissociative or anaesthetics, general or anesthetic or anesthetic drug or anesthetics or anesthetics, combined or anesthetics, dissociative or anesthetics, general or general anaesthetic or general anaesthetic agent or general anesthetic or general anesthetic agent or preanaesthetics or preanesthetics or anaesthetic,volatile or anaesthetics, inhalation or anaesthetics,rapidly evaporating or anesthetic,volatile or anesthetics, inhalation or anesthetics,rapidly evaporating or gas anaesthetic agent or gas anesthetic agent or inhalation anaesthetic or inhalation anaesthetic agent or inhalation anesthetic or volatile anaesthetic or volatile anaesthetic agent or volatile anesthetic or volatile anesthetic agent or anaesthetic,intravenous or anaesthetics, intravenous or anaesthetics,intravenous or anesthetic,intravenous or anesthetics, intravenous or anesthetics,intravenous or intravenous anaesthetic agent or aerrane or aerrane or forane or forene or forthane or isoflurano or isorane or sofloran or sevoflo or sevofrane or sevorane or sevotec or sojourn or ultane or ultane pen or sulorane or suprane or anestane or bromochlorotrifluorethane or fluorothan or fluorothane or fluothane or ftorotan or halan or halothan or halothane metabolite or halothane or ineltano or narcotan or phthorothane or trothane or dinitrogen monoxide or dinitrogen oxide or factitious air or hyponitrous acid anhydride or laughing gas or nitrogen protoxide or anepol or cryotol

or diisoprofol or diprivan or diprofol or disoprivan or disoprofol or fresofol or gobbifol or pofol or propocam or propofol lipuro or propofol-lipuro or rapinonet or refofol or safol or anesthal or farmotal or hypnostan or intraval or leopental or nesdonal or penthiobarbital or penthotal or pentothal or pentothal sodico or pentothal sodium or pharmothal or ravonal or sodipental or sodium pentothal or sodium thiopental or thiomebumal or thiomebumal sodium or thionembatal or thionyl or thiopental sodium or thiopentalbarbital or thiopentemal or thiopenthal or thiopentobarbital or thiopentone or thiopentone sodium or thiotal or thiothal or tio pentemal or tiopental sodico or trapanal or anesject or calipsol or calypso or imalgene or kalipsol or katamine or keta-hameln or ketaject or ketalar or ketalin or ketamax or ketamine hcl or ketamine hydrochloride or ketaminol vet or ketanest or ketased or ketaset or ketaved or ketavet or ketmin or ketoject or ketolar or narkamon or narketan or soon-soon or tekam or velonarcon or vetalar or buccolam or dalam or doricum or dormonid or fortanest or fulsed or hypnoval or hypnovel or hypnoyvel or ipnovel or midacum or midazo or midazol or midazolam hydrochloride or midazolam hydrochloride preservative free or midolam or miloz or versed or benzodiazepine or benzodiazepin derivative or benzodiazepines or benzodiazepinones or benzodiazepine agonist or benzodiazepine receptor agonist or benzodiazepine receptor stimulant or benzodiazepine receptor stimulator or benzodiazepine stimulant or benzodiazepine stimulating agent or benzodiazepine stimulator or arkamin or atensina or caprysin or catapres or catapres tts or catapresan or catapresan depot or catapresan tts or catapressan or catapressan perlonguettes or catapressant or catasan or chlofazolin or chlophazolin or chlophelin or clonidine or clofelin or clofeline or clomidine or clonidine or clonicele or clonidine or clonidine chlorhydrate or clonidine hydrochloride or clonipresan or clonistada or clonistada retard or clonnirit or clophelin or clopheline or daipres or dcai or dichlorophenylaminoimidazoline or dichlorophenylaminoimidazoline hydrochloride or dixarit or duraclon or haemiton or hemiton or huma-clonidine or hypodine or isoglaucan or jenloga or kapvay or melzin or normopresan or normopresin or paracefan or sulmidine or taitecin or tenso timelets or adrenergic alpha agonists or adrenergic alpha-agonists or alpha adrenergic agent or alpha adrenergic agonist or alpha adrenergic receptor agent or alpha adrenergic receptor agonist or alpha adrenergic receptor stimulant or alpha adrenergic receptor stimulator or alpha adrenergic stimulant or alpha adrenergic stimulating agent or alpha adrenergic stimulator or alpha adrenoceptor agonist or alpha adrenoceptor stimulant or alpha adrenoceptor stimulating agent or alpha adrenoceptor stimulator or alpha agonist or alpha sympathicomimetic or alpha sympathicomimetic agent or noradrenalin agonist or noradrenergic agonist or noradrenergic receptor stimulating agent or dexamedetomidine or dexdomitor or dexdor or dexmedetomidine hydrochloride or precede or primadex or sileo or GABA agonist or GABA agonists or GABA receptor agonist or GABA receptor stimulant or GABA receptor stimulating agent or GABA receptor stimulator or GABAergic receptor agonist or GABAergic receptor stimulant or GABAergic receptor stimulating agent or GABAergic receptor stimulator or GABAmimetic or GABAmimetic agent or gamma aminobutyric acid agonist or gamma aminobutyric acid receptor agonist or gamma aminobutyric acid receptor stimulant or gamma aminobutyric acid receptor stimulating agent or gamma aminobutyric acid receptor stimulator or n-

methyl d-aspartate antagonist or n-methyl d-aspartate blocker or n-methyl d-aspartate blocking agent or n-methyl d-aspartate receptor antagonist or n-methyl d-aspartate receptor blocker or n-methyl d-aspartate receptor blocking agent or n-methyl d-aspartic acid antagonist or n-methyl d-aspartic acid blocker or n-methyl d-aspartic acid blocking agent or n-methyl d-aspartic acid receptor antagonist or n-methyl d-aspartic acid receptor blocker or n-methyl d-aspartic acid receptor blocking agent or n-methyl dextro aspartate antagonist or n-methyl dextro aspartate blocker or n-methyl dextro aspartate blocking agent or n-methyl dextro aspartate receptor antagonist or n-methyl dextro aspartate receptor blocker or n-methyl dextro aspartate receptor blocking agent or n-methyl dextro aspartic acid antagonist or n-methyl dextro aspartic acid blocker or n-methyl dextro aspartic acid blocking agent or n-methyl dextro aspartic acid receptor antagonist or n-methyl dextro aspartic acid receptor blocker or NMDA antagonist or NMDA blocker or NMDA blocking agent or NMDA receptor antagonist or NMDA receptor antagonists or NMDA receptor blocker or NMDA receptor blocking agent).mp. [mp=title, abstract, original title, name of substance word, subject heading word, floating sub-heading word, keyword heading word, organism supplementary concept word, protocol supplementary concept word, rare disease supplementary concept word, unique identifier, synonyms]

25. 9 or 10 or 11 or 12 or 13 or 14 or 14 or 15 or 16 or 17 or 18 or 19 or 20 or 21 or 22 or 23 or 24

26. (cognitive accessibility or cognitive balance or cognitive dissonance or cognitive function or cognitive structure or cognitive symptoms or cognitive task or cognitive thinking or neurobehavioral manifestations or neurobehavioural manifestations or volition or cognition disorder or cognition disorders or cognitive defects or cognitive deficit or cognitive disability or cognitive disorder or cognitive disorders or cognitive dysfunction or cognitive impairment or delirium, dementia, amnesic, cognitive disorders or overinclusion or response interference or behavior, child or behaviour, child or child behavior or infant behavior or infant behavior or disorder, learning or impaired learning or learning deficit or learning difficulty or learning disabilities or learning disability or learning disorders or learning disturbance or learning impairment or learning problem or abnormal development or child development disorder or development disorder or developmental disabilities).mp. [mp=title, abstract, original title, name of substance word, subject heading word, floating sub-heading word, keyword heading word, organism supplementary concept word, protocol supplementary concept word, rare disease supplementary concept word, unique identifier, synonyms]

27. exp developmental disorder/ or exp Learning disorder/ or exp Child behavior/ or exp Postoperative cognitive dysfunction/ or exp Cognitive defect/ or exp Cognition assessment/ or exp Cognition/

26 or 27

28. 8 and 25 and 28

29 not ((exp animal/ or nonhuman/) not exp human/)

## **Embase**

1. 'child of impaired parents'/exp OR 'child of impaired parents' OR (('child'/exp OR child) AND of AND impaired AND ('parents'/exp OR parents)) OR 'children'/exp OR children OR 'single parent child'/exp OR 'single parent child' OR (single AND ('parent'/exp OR parent) AND ('child'/exp OR child)) OR 'child, preschool'/exp OR 'child, preschool' OR (child, AND ('preschool'/exp OR preschool)) OR 'pre-school child'/exp OR 'pre-school child' OR ('pre school' AND ('child'/exp OR child)) OR 'pre-school going children'/exp OR 'pre-school going children' OR ('pre school' AND going AND ('children'/exp OR children)) OR 'pre schooler'/exp OR 'pre schooler' OR 'pre schoolers'/exp OR 'pre schoolers' OR 'preschool child institution'/exp OR 'preschool child institution' OR (('preschool'/exp OR preschool) AND ('child'/exp OR child) AND institution) OR 'preschooler'/exp OR preschooler OR 'infancy'/exp OR infancy OR 'infant'/exp OR infant OR 'baby'/exp OR baby OR 'childhood'/exp OR childhood OR 'child,school'/exp OR child,school OR 'school boy'/exp OR 'school boy' OR (('school'/exp OR school) AND ('boy'/exp OR boy)) OR 'school children'/exp OR 'school children' OR (('school'/exp OR school) AND ('children'/exp OR children)) OR 'school girl'/exp OR 'school girl' OR (('school'/exp OR school) AND ('girl'/exp OR girl)) OR 'school-going boy' OR ('school going' AND ('boy'/exp OR boy)) OR 'school-going boys' OR ('school going' AND boys) OR 'school-going child' OR ('school going' AND ('child'/exp OR child)) OR 'school-going children' OR ('school going' AND ('children'/exp OR children)) OR 'school-going girl' OR ('school going' AND ('girl'/exp OR girl)) OR 'school-going girls' OR ('school going' AND girls) OR 'schoolboy'/exp OR schoolboy OR 'schoolboys'/exp OR schoolboys OR 'schoolchild'/exp OR schoolchild OR 'schoolchildren'/exp OR schoolchildren OR 'schoolgirl'/exp OR schoolgirl OR 'schoolgirls'/exp OR schoolgirls OR 'schoolgoing child' OR (schoolgoing AND ('child'/exp OR child)) OR 'schoolgoing children' OR (schoolgoing AND ('children'/exp OR children)) OR 'animals, newborn'/exp OR 'animals, newborn' OR (animals, AND ('newborn'/exp OR newborn)) OR 'child, newborn'/exp OR 'child, newborn' OR (child, AND ('newborn'/exp OR newborn)) OR 'full term infant'/exp OR 'full term infant' OR (full AND term AND ('infant'/exp OR infant)) OR 'human neonate'/exp OR 'human neonate' OR (('human'/exp OR human) AND ('neonate'/exp OR neonate)) OR 'human newborn'/exp OR 'human newborn' OR (('human'/exp OR human) AND ('newborn'/exp OR newborn)) OR 'infant, newborn'/exp OR 'infant, newborn' OR (infant, AND ('newborn'/exp OR newborn)) OR 'neonatal animal'/exp OR 'neonatal animal' OR (neonatal AND ('animal'/exp OR animal)) OR 'neonate'/exp OR neonate OR 'neonate animal'/exp OR 'neonate animal' OR (('neonate'/exp OR neonate) AND ('animal'/exp OR animal)) OR neonates OR 'newborn animal'/exp OR 'newborn animal' OR (('newborn'/exp OR newborn) AND ('animal'/exp OR animal)) OR 'newborn baby'/exp OR 'newborn baby' OR (('newborn'/exp OR newborn) AND ('baby'/exp OR baby)) OR 'newborn child'/exp OR 'newborn child' OR (('newborn'/exp OR newborn) AND ('child'/exp OR child)) OR 'newborn infant'/exp OR 'newborn infant' OR (('newborn'/exp OR newborn) AND ('infant'/exp OR infant)) OR 'newly born baby'/exp OR 'newly born baby' OR (newly AND born AND ('baby'/exp OR baby)) OR 'newly born child'/exp OR 'newly born child' OR (newly AND born AND ('child'/exp OR child)) OR 'newly born infant'/exp OR 'newly born infant' OR (newly AND born AND ('infant'/exp OR infant)) OR 'toddlers'/exp OR toddlers OR 'adolescent,

institutionalized'/exp OR 'adolescent, institutionalized' OR (adolescent, AND institutionalized) OR 'institutionalised adolescent'/exp OR 'institutionalised adolescent' OR (institutionalised AND ('adolescent'/exp OR adolescent)) OR 'institutionalized adolescent'/exp OR 'institutionalized adolescent' OR (institutionalized AND ('adolescent'/exp OR adolescent)) OR 'teenager'/exp OR teenager OR 'teenage'/exp OR teenage

2. 'Child'/exp

3. 'Preschool Child'/exp

4. 'Juvenile'/exp

5. 'Infancy'/exp

6. 'Infancy'/exp

7. 'Baby'/exp

8. 'Childhood'/exp

9. 'School Child'/exp

10. 'Newborn'/exp

11. 'Toddler'/exp

12. 'Adolescent'/exp

13. 'Adolescence'/exp

14. 1 or 2 or 3 or 4 or 5 or 6 or 7 or 8 or 9 or 10 or 11 or 12 or 13

15. 'General an?esthesia'/exp

16. 'P?ediatric An?esthesia'/exp

17. 'Intravenous an?esthesia'/exp

18. 'Inhalation An?esthesia'/exp

19. 'anesthetic agent'/exp

20. 'Inhalation an?esthetic Agent'/exp

21. 'Intravenous an?esthetic Agent'/exp

22. 'Isoflurane'/exp

23. 'Sevoflurane'/exp

24. 'Desflurane'/exp

25. 'Halothane'/exp

26. 'Nitrous Oxide'/exp



27. 'Propofol'/exp
28. 'Thiopental'/exp
29. 'Ketamine'/exp
30. 'Clonidine'/exp
31. 'Benzodiazepine receptor stimulating agent'/exp
32. 'Benzodiazepine derivative'/exp
33. 'Benzodiazepine'/exp
34. 'alpha adrenergic receptor stimulating agent'/exp
35. 'Dexmedetomidine'/exp
36. '4 aminobutyric acid receptor stimulating agent'/exp
37. 'n methyl dextro aspartic acid receptor blocking agent'/exp
38. 'anaesthesia, intratracheal'/exp OR 'anaesthesia, intratracheal' OR (anaesthesia, AND intratracheal) OR 'anaesthesia,auto'/exp OR anaesthesia,auto OR 'anaesthetic action'/exp OR 'anaesthetic action' OR (('anaesthetic'/exp OR anaesthetic) AND ('action'/exp OR action)) OR 'anesthesia, intratracheal'/exp OR 'anesthesia, intratracheal' OR (anesthesia, AND intratracheal) OR 'anesthesia,auto'/exp OR anesthesia,auto OR 'anesthetic action'/exp OR 'anesthetic action' OR (('anesthetic'/exp OR anesthetic) AND ('action'/exp OR action)) OR 'anesthetization'/exp OR anesthetization OR 'animal anaesthesia'/exp OR 'animal anaesthesia' OR (('animal'/exp OR animal) AND ('anaesthesia'/exp OR anaesthesia)) OR 'animal anesthesia'/exp OR 'animal anesthesia' OR (('animal'/exp OR animal) AND ('anesthesia'/exp OR anesthesia)) OR 'autoanaesthesia'/exp OR autoanaesthesia OR 'autoanesthesia'/exp OR autoanesthesia OR 'drop mask anaesthesia'/exp OR 'drop mask anaesthesia' OR (drop AND ('mask'/exp OR mask) AND ('anaesthesia'/exp OR anaesthesia)) OR 'drop mask anesthesia'/exp OR 'drop mask anesthesia' OR (drop AND ('mask'/exp OR mask) AND ('anesthesia'/exp OR anesthesia)) OR 'narcosis'/exp OR narcosis OR 'neuroanaesthesia'/exp OR neuroanaesthesia OR 'neuroanesthesia'/exp OR neuroanesthesia OR 'short anaesthesia'/exp OR 'short anaesthesia' OR (short AND ('anaesthesia'/exp OR anaesthesia)) OR 'short anesthesia'/exp OR 'short anesthesia' OR (short AND ('anesthesia'/exp OR anesthesia)) OR 'short duration'/exp OR 'short duration' OR (short AND ('duration'/exp OR duration)) OR 'anaesthesia'/exp OR anaesthesia OR 'short duration anesthesia'/exp OR 'short duration anesthesia' OR (short AND ('duration'/exp OR duration) AND ('anesthesia'/exp OR anesthesia)) OR 'anaesthesia, general'/exp OR 'anaesthesia, general' OR (anaesthesia, AND general) OR 'anaesthesia,general'/exp OR anaesthesia,general OR 'anesthesia, general'/exp OR 'anesthesia, general' OR (anesthesia, AND general) OR 'anesthesia,general'/exp OR anesthesia,general OR 'general anaesthesia'/exp OR 'general anaesthesia' OR (general AND ('anaesthesia'/exp OR anaesthesia)) OR 'anaesthesia,child'/exp OR anaesthesia,child OR 'anaesthesia,paediatric'/exp OR anaesthesia,paediatric OR 'anesthesia,child'/exp OR anesthesia,child OR 'anesthesia,pediatric'/exp OR

anesthesia,pediatric OR 'child anaesthesia'/exp OR 'child anaesthesia' OR (('child'/exp OR child) AND ('anaesthesia'/exp OR anaesthesia)) OR 'child anesthesia'/exp OR 'child anesthesia' OR (('child'/exp OR child) AND ('anesthesia'/exp OR anesthesia)) OR 'paediatric anaesthesia'/exp OR 'paediatric anaesthesia' OR (('paediatric'/exp OR paediatric) AND ('anaesthesia'/exp OR anaesthesia)) OR 'anaesthesia,intravenous'/exp OR anaesthesia,intravenous OR 'anaesthesia,local,intravenous'/exp OR anaesthesia,local,intravenous OR 'anesthesia, intravenous'/exp OR 'anesthesia, intravenous' OR (anesthesia, AND intravenous) OR 'anesthesia,intravenous'/exp OR anesthesia,intravenous OR 'anesthesia,local,intravenous'/exp OR anesthesia,local,intravenous OR 'intravenous anaesthesia'/exp OR 'intravenous anaesthesia' OR (intravenous AND ('anaesthesia'/exp OR anaesthesia)) OR 'intravenous local anaesthesia'/exp OR 'intravenous local anaesthesia' OR (intravenous AND local AND ('anaesthesia'/exp OR anaesthesia)) OR 'intravenous local anesthesia'/exp OR 'intravenous local anesthesia' OR (intravenous AND local AND ('anesthesia'/exp OR anesthesia)) OR 'local anaesthesia,intravenous'/exp OR 'local anaesthesia,intravenous' OR (local AND ('anaesthesia,intravenous'/exp OR anaesthesia,intravenous)) OR 'local anesthesia,intravenous'/exp OR 'local anesthesia,intravenous' OR (local AND ('anesthesia,intravenous'/exp OR anesthesia,intravenous)) OR 'anaesthesia, closed-circuit'/exp OR 'anaesthesia, closed-circuit' OR (anaesthesia, AND 'closed circuit') OR 'anaesthesia, inhalation'/exp OR 'anaesthesia, inhalation' OR (anaesthesia, AND ('inhalation'/exp OR inhalation)) OR 'anaesthesia,closed circuit'/exp OR 'anaesthesia,closed circuit' OR (anaesthesia,closed AND ('circuit'/exp OR circuit)) OR 'anaesthesia,inhalation'/exp OR anesthesia,inhalation OR 'anaesthetic system,closed'/exp OR 'anaesthetic system,closed' OR (('anaesthetic'/exp OR anaesthetic) AND system,closed) OR 'anesthesia, closed-circuit'/exp OR 'anesthesia, closed-circuit' OR (anesthesia, AND 'closed circuit') OR 'anesthesia, inhalation'/exp OR 'anesthesia, inhalation' OR (anesthesia, AND ('inhalation'/exp OR inhalation)) OR 'anesthesia,closed circuit'/exp OR 'anesthesia,closed circuit' OR (anesthesia,closed AND ('circuit'/exp OR circuit)) OR 'anesthesia,inhalation'/exp OR anesthesia,inhalation OR 'anesthetic system,closed'/exp OR 'anesthetic system,closed' OR (('anesthetic'/exp OR anesthetic) AND system,closed) OR 'closed anaesthetic circuit'/exp OR 'closed anaesthetic circuit' OR (closed AND ('anaesthetic'/exp OR anaesthetic) AND ('circuit'/exp OR circuit)) OR 'closed anaesthetic system'/exp OR 'closed anaesthetic system' OR (closed AND ('anaesthetic'/exp OR anaesthetic) AND system) OR 'closed anesthetic circuit'/exp OR 'closed anesthetic circuit' OR (closed AND ('anesthetic'/exp OR anesthetic) AND ('circuit'/exp OR circuit)) OR 'closed anesthetic system'/exp OR 'closed anesthetic system' OR (closed AND ('anesthetic'/exp OR anesthetic) AND system) OR 'closed circuit anaesthesia'/exp OR 'closed circuit anaesthesia' OR (closed AND ('circuit'/exp OR circuit) AND ('anaesthesia'/exp OR anaesthesia)) OR 'closed circuit anesthesia'/exp OR 'closed circuit anesthesia' OR (closed AND ('circuit'/exp OR circuit) AND ('anesthesia'/exp OR anesthesia)) OR 'inhalation anaesthesia'/exp OR 'inhalation anaesthesia' OR (('inhalation'/exp OR inhalation) AND ('anaesthesia'/exp OR anaesthesia)) OR 'anaesthetic'/exp OR anaesthetic OR 'anaesthetic agent'/exp OR 'anaesthetic agent' OR (('anaesthetic'/exp OR anaesthetic) AND ('agent'/exp OR agent)) OR 'anaesthetic drug'/exp OR 'anaesthetic drug' OR (('anaesthetic'/exp OR anaesthetic) AND ('drug'/exp OR

drug)) OR 'anaesthetics'/exp OR anaesthetics OR 'anaesthetics, combined'/exp OR 'anaesthetics, combined' OR (anaesthetics, AND combined) OR 'anaesthetics, dissociative'/exp OR 'anaesthetics, dissociative' OR (anaesthetics, AND dissociative) OR 'anaesthetics, general'/exp OR 'anaesthetics, general' OR (anaesthetics, AND general) OR 'anesthetic'/exp OR anesthetic OR 'anesthetic drug'/exp OR 'anesthetic drug' OR (('anesthetic'/exp OR anesthetic) AND ('drug'/exp OR drug)) OR 'anesthetics'/exp OR anesthetics OR 'anesthetics, combined'/exp OR 'anesthetics, combined' OR (anesthetics, AND combined) OR 'anesthetics, dissociative'/exp OR 'anesthetics, dissociative' OR (anesthetics, AND dissociative) OR 'anesthetics, general'/exp OR 'anesthetics, general' OR (anesthetics, AND general) OR 'general anaesthetic'/exp OR 'general anaesthetic' OR (general AND ('anaesthetic'/exp OR anaesthetic)) OR 'general anaesthetic agent'/exp OR 'general anaesthetic agent' OR (general AND ('anaesthetic'/exp OR anaesthetic) AND ('agent'/exp OR agent)) OR 'general anesthetic'/exp OR 'general anesthetic' OR (general AND ('anesthetic'/exp OR anesthetic)) OR 'general anesthetic agent'/exp OR 'general anesthetic agent' OR (general AND ('anesthetic'/exp OR anesthetic) AND ('agent'/exp OR agent)) OR 'preanaesthetics'/exp OR preanaesthetics OR 'preanesthetics'/exp OR preanesthetics OR 'anaesthetic,volatile'/exp OR anaesthetic,volatile OR 'anaesthetics, inhalation'/exp OR 'anaesthetics, inhalation' OR (anaesthetics, AND ('inhalation'/exp OR inhalation)) OR 'anaesthetics,rapidly evapourating'/exp OR 'anaesthetics,rapidly evapourating' OR (anaesthetics,rapidly AND evapourating) OR 'anesthetic,volatile'/exp OR anesthetic,volatile OR 'anesthetics, inhalation'/exp OR 'anesthetics, inhalation' OR (anesthetics, AND ('inhalation'/exp OR inhalation)) OR 'anesthetics,rapidly evaporating'/exp OR 'anesthetics,rapidly evaporating' OR (anesthetics,rapidly AND evaporating) OR 'gas anaesthetic agent'/exp OR 'gas anaesthetic agent' OR (('gas'/exp OR gas) AND ('anaesthetic'/exp OR anaesthetic) AND ('agent'/exp OR agent)) OR 'gas anesthetic agent'/exp OR 'gas anesthetic agent' OR (('gas'/exp OR gas) AND ('anesthetic'/exp OR anesthetic) AND ('agent'/exp OR agent)) OR 'inhalation anaesthetic'/exp OR 'inhalation anaesthetic' OR (('inhalation'/exp OR inhalation) AND ('anaesthetic'/exp OR anaesthetic)) OR 'inhalation anaesthetic agent'/exp OR 'inhalation anaesthetic agent' OR (('inhalation'/exp OR inhalation) AND ('anaesthetic'/exp OR anaesthetic) AND ('agent'/exp OR agent)) OR 'inhalation anesthetic'/exp OR 'inhalation anesthetic' OR (('inhalation'/exp OR inhalation) AND ('anesthetic'/exp OR anesthetic)) OR 'volatile anaesthetic'/exp OR 'volatile anaesthetic' OR (volatile AND ('anaesthetic'/exp OR anaesthetic)) OR 'volatile anaesthetic agent'/exp OR 'volatile anaesthetic agent' OR (volatile AND ('anaesthetic'/exp OR anaesthetic) AND ('agent'/exp OR agent)) OR 'volatile anesthetic'/exp OR 'volatile anesthetic' OR (volatile AND ('anesthetic'/exp OR anesthetic)) OR 'volatile anesthetic agent'/exp OR 'volatile anesthetic agent' OR (volatile AND ('anesthetic'/exp OR anesthetic) AND ('agent'/exp OR agent)) OR 'anaesthetic,intravenous'/exp OR anaesthetic,intravenous OR 'anaesthetics, intravenous'/exp OR 'anaesthetics, intravenous' OR (anaesthetics, AND intravenous) OR 'anaesthetics,intravenous'/exp OR anaesthetics,intravenous OR 'anesthetic,intravenous'/exp OR anesthetic,intravenous OR 'anesthetics, intravenous'/exp OR 'anesthetics, intravenous' OR (anesthetics, AND intravenous) OR 'anesthetics,intravenous'/exp OR anesthetics,intravenous OR 'intravenous anaesthetic agent'/exp OR 'intravenous anaesthetic agent'

OR (intravenous AND ('anaesthetic'/exp OR anaesthetic) AND ('agent'/exp OR agent)) OR 'trifluoroethyl ether' OR (trifluoroethyl AND ('ether'/exp OR ether)) OR 'forane'/exp OR forane OR 'forene'/exp OR forene OR 'forthane'/exp OR forthane OR 'isoflurano'/exp OR isoflurano OR 'isorane'/exp OR isorane OR 'sofloran'/exp OR sofloran OR 'sevoflo'/exp OR sevoflo OR 'sevofrane'/exp OR sevofrane OR 'sevorane'/exp OR sevorane OR 'sevotec'/exp OR sevotec OR sojourn OR 'ultane'/exp OR ultane OR 'ultane pen' OR (('ultane'/exp OR ultane) AND ('pen'/exp OR pen)) OR 'sulorane'/exp OR sulorane OR 'suprane'/exp OR suprane OR 'anestane'/exp OR anestane OR 'bromochlorotrifluorethane'/exp OR bromochlorotrifluorethane OR 'fluorothan'/exp OR fluorothan OR 'fluorothane'/exp OR fluorothane OR 'fluothane'/exp OR fluothane OR 'ftorotan'/exp OR ftorotan OR 'halan'/exp OR halan OR 'halothan'/exp OR halothan OR 'halothane metabolite'/exp OR 'halothane metabolite' OR (('halothane'/exp OR halothane) AND ('metabolite'/exp OR metabolite)) OR 'halothane'/exp OR halothane OR 'ineltano'/exp OR ineltano OR 'narcotan'/exp OR narcotan OR 'phthorothane'/exp OR phthorothane OR 'trothane'/exp OR trothane OR 'dinitrogen monoxide'/exp OR 'dinitrogen monoxide' OR (('dinitrogen'/exp OR dinitrogen) AND monoxide) OR 'dinitrogen oxide'/exp OR 'dinitrogen oxide' OR (('dinitrogen'/exp OR dinitrogen) AND ('oxide'/exp OR oxide)) OR 'factitious air'/exp OR 'factitious air' OR (factitious AND ('air'/exp OR air)) OR 'hyponitrous acid anhydride'/exp OR 'hyponitrous acid anhydride' OR (hyponitrous AND ('acid'/exp OR acid) AND ('anhydride'/exp OR anhydride)) OR 'laughing gas'/exp OR 'laughing gas' OR (('laughing'/exp OR laughing) AND ('gas'/exp OR gas)) OR 'nitrogen protoxide'/exp OR 'nitrogen protoxide' OR (('nitrogen'/exp OR nitrogen) AND protoxide) OR 'anepol'/exp OR anepol OR 'crytol'/exp OR crytol OR 'diisoprofol'/exp OR diisoprofol OR 'diprivan'/exp OR diprivan OR 'diprofol'/exp OR diprofol OR 'disoprivan'/exp OR disoprivan OR 'disoprofol'/exp OR disoprofol OR 'fresofol'/exp OR fresofol OR 'gobbifol'/exp OR gobbifol OR 'pofol'/exp OR pofol OR 'propocam'/exp OR propocam OR (('propofol'/exp OR propofol) AND ('lipuro'/exp OR lipuro)) OR 'propofol lipuro'/exp OR 'propofol lipuro' OR 'rapinovet'/exp OR rapinovet OR 'recofol'/exp OR recofol OR 'safol'/exp OR safol OR 'anesthal'/exp OR anesthal OR 'farmotal'/exp OR farmotal OR 'hypnoston'/exp OR hypnoston OR 'intraval'/exp OR intraval OR 'leopental'/exp OR leopental OR 'nesdonal'/exp OR nesdonal OR 'penthiobarbital'/exp OR penthiobarbital OR 'penthotal'/exp OR penthotal OR 'pentothal'/exp OR pentothal OR 'pentothal sodico'/exp OR 'pentothal sodico' OR (('pentothal'/exp OR pentothal) AND sodico) OR 'pentothal sodium'/exp OR 'pentothal sodium' OR (('pentothal'/exp OR pentothal) AND ('sodium'/exp OR sodium)) OR 'pharmothal'/exp OR pharmothal OR 'ravonal'/exp OR ravonal OR 'sodipental'/exp OR sodipental OR 'sodium pentothal'/exp OR 'sodium pentothal' OR (('sodium'/exp OR sodium) AND ('pentothal'/exp OR pentothal)) OR 'sodium thiopental'/exp OR 'sodium thiopental' OR (('sodium'/exp OR sodium) AND ('thiopental'/exp OR thiopental)) OR 'thiomebumal'/exp OR thiomebumal OR 'thiomebumal sodium'/exp OR 'thiomebumal sodium' OR (('thiomebumal'/exp OR thiomebumal) AND ('sodium'/exp OR sodium)) OR 'thionembutal'/exp OR thionembutal OR 'thionyl'/exp OR thionyl OR 'thiopental sodium'/exp OR 'thiopental sodium' OR (('thiopental'/exp OR thiopental) AND ('sodium'/exp OR sodium)) OR 'thiopentalbarbital'/exp OR thiopentalbarbital OR 'thiopentemal'/exp OR thiopentemal OR 'thiopenthal'/exp OR thiopenthal OR

'thiopentobarbital'/exp OR thiopentobarbital OR 'thiopentone'/exp OR thiopentone OR 'thiopentone sodium'/exp OR 'thiopentone sodium' OR (('thiopentone'/exp OR thiopentone) AND ('sodium'/exp OR sodium)) OR 'thiotal'/exp OR thiotal OR 'thiothal'/exp OR thiothal OR 'tio pentemal'/exp OR 'tio pentemal' OR (tio AND pentemal) OR 'tiopental sodico'/exp OR 'tiopental sodico' OR (tiopental AND sodico) OR 'trapanal'/exp OR trapanal OR 'anesject'/exp OR anesject OR 'calipsol'/exp OR calipsol OR 'calypso'/exp OR calypso OR 'imalgene'/exp OR imalgene OR 'kalipsol'/exp OR kalipsol OR 'katamine'/exp OR katamine OR 'keta hameln'/exp OR 'keta hameln' OR 'ketaject'/exp OR ketaject OR 'ketalar'/exp OR ketalar OR 'ketalin'/exp OR ketalin OR 'ketamax'/exp OR ketamax OR 'ketamine hcl'/exp OR 'ketamine hcl' OR (('ketamine'/exp OR ketamine) AND hcl) OR 'ketamine hydrochloride'/exp OR 'ketamine hydrochloride' OR (('ketamine'/exp OR ketamine) AND ('hydrochloride'/exp OR hydrochloride)) OR 'ketaminol vet'/exp OR 'ketaminol vet' OR (('ketaminol'/exp OR ketaminol) AND vet) OR 'ketanest'/exp OR ketanest OR 'ketased'/exp OR ketased OR 'ketaset'/exp OR ketaset OR 'ketaved'/exp OR ketaved OR 'ketavet'/exp OR ketavet OR 'ketmin'/exp OR ketmin OR 'ketoject'/exp OR ketoject OR 'ketolar'/exp OR ketolar OR 'narkamon'/exp OR narkamon OR 'narketan'/exp OR narketan OR 'soon soon'/exp OR 'soon soon' OR 'tekam'/exp OR tekam OR 'velonarcon'/exp OR velonarcon OR 'vetalar'/exp OR vetalar OR 'buccolam'/exp OR buccolam OR 'dalam'/exp OR dalam OR 'doricum'/exp OR doricum OR 'dormonid'/exp OR dormonid OR 'fortanest'/exp OR fortanest OR 'fulsed'/exp OR fulsed OR 'hypnoval'/exp OR hypnoval OR 'hypnovel'/exp OR hypnovel OR 'hypnoyvel'/exp OR hypnoyvel OR 'ipnovel'/exp OR ipnovel OR 'midacum'/exp OR midacum OR 'midazo'/exp OR midazo OR 'midazol'/exp OR midazol OR 'midazolam hydrochloride'/exp OR 'midazolam hydrochloride' OR (('midazolam'/exp OR midazolam) AND ('hydrochloride'/exp OR hydrochloride)) OR 'midazolam hydrochloride preservative free'/exp OR 'midazolam hydrochloride preservative free' OR (('midazolam'/exp OR midazolam) AND ('hydrochloride'/exp OR hydrochloride) AND ('preservative'/exp OR preservative) AND free) OR 'midolam'/exp OR midolam OR 'miloz'/exp OR miloz OR 'versed'/exp OR versed OR 'benzodiazepine'/exp OR benzodiazepine OR 'benzodiazepin derivative'/exp OR 'benzodiazepin derivative' OR (benzodiazepin AND derivative) OR 'benzodiazepines'/exp OR benzodiazepines OR 'benzodiazepinones'/exp OR benzodiazepinones OR 'benzodiazepine agonist'/exp OR 'benzodiazepine agonist' OR (('benzodiazepine'/exp OR benzodiazepine) AND ('agonist'/exp OR agonist)) OR 'benzodiazepine receptor agonist'/exp OR 'benzodiazepine receptor agonist' OR (('benzodiazepine'/exp OR benzodiazepine) AND ('receptor'/exp OR receptor) AND ('agonist'/exp OR agonist)) OR 'benzodiazepine receptor stimulant'/exp OR 'benzodiazepine receptor stimulant' OR (('benzodiazepine'/exp OR benzodiazepine) AND ('receptor'/exp OR receptor) AND ('stimulant'/exp OR stimulant)) OR 'benzodiazepine receptor stimulator'/exp OR 'benzodiazepine receptor stimulator' OR (('benzodiazepine'/exp OR benzodiazepine) AND ('receptor'/exp OR receptor) AND ('stimulator'/exp OR stimulator)) OR 'benzodiazepine stimulant'/exp OR 'benzodiazepine stimulant' OR (('benzodiazepine'/exp OR benzodiazepine) AND ('stimulant'/exp OR stimulant)) OR 'benzodiazepine stimulating agent'/exp OR 'benzodiazepine stimulating agent' OR (('benzodiazepine'/exp OR benzodiazepine) AND stimulating AND ('agent'/exp OR agent)) OR 'benzodiazepine

stimulator'/exp OR 'benzodiazepine stimulator' OR (('benzodiazepine'/exp OR benzodiazepine) AND ('stimulator'/exp OR stimulator))  
OR 'arkamin'/exp OR arkamin OR 'atensina'/exp OR atensina OR 'caprysin'/exp OR caprysin OR 'catapres'/exp OR catapres OR 'catapres  
tts'/exp OR 'catapres tts' OR (('catapres'/exp OR catapres) AND tts) OR 'catapresan'/exp OR catapresan OR 'catapresan depot'/exp OR  
'catapresan depot' OR (('catapresan'/exp OR catapresan) AND ('depot'/exp OR depot)) OR 'catapresan tts'/exp OR 'catapresan tts' OR  
(('catapresan'/exp OR catapresan) AND tts) OR 'catapressan'/exp OR catapressan OR 'catapressan perlonguettes'/exp OR 'catapressan  
perlonguettes' OR (('catapressan'/exp OR catapressan) AND perlonguettes) OR 'catapressant'/exp OR catapressant OR 'catasan'/exp  
OR catasan OR 'chlofazolin'/exp OR chlofazolin OR 'chlophazolin'/exp OR chlophazolin OR 'chlophelin'/exp OR chlophelin OR  
'clofelin'/exp OR clofelin OR 'clofeline'/exp OR clofeline OR 'clomidine'/exp OR clomidine OR 'clonicef'/exp OR clonicef OR  
'clonidine'/exp OR clonidine OR 'clonidine chlorhydrate'/exp OR 'clonidine chlorhydrate' OR (('clonidine'/exp OR clonidine) AND  
('chlorhydrate'/exp OR chlorhydrate)) OR 'clonidine hydrochloride'/exp OR 'clonidine hydrochloride' OR (('clonidine'/exp OR clonidine)  
AND ('hydrochloride'/exp OR hydrochloride)) OR 'clonipresan'/exp OR clonipresan OR 'clonistada'/exp OR clonistada OR 'clonistada  
retard'/exp OR 'clonistada retard' OR (('clonistada'/exp OR clonistada) AND ('retard'/exp OR retard)) OR 'clonnirit'/exp OR clonnirit OR  
'clophelin'/exp OR clophelin OR 'clopheline'/exp OR clopheline OR 'daipres'/exp OR daipres OR 'dcai'/exp OR dcai OR  
'dichlorophenylaminoimidazoline'/exp OR dichlorophenylaminoimidazoline OR 'dichlorophenylaminoimidazoline hydrochloride'/exp  
OR 'dichlorophenylaminoimidazoline hydrochloride' OR (('dichlorophenylaminoimidazoline'/exp OR dichlorophenylaminoimidazoline)  
AND ('hydrochloride'/exp OR hydrochloride)) OR 'dixarit'/exp OR dixarit OR 'duraclon'/exp OR duraclon OR 'haemiton'/exp OR  
haemiton OR 'hemiton'/exp OR hemiton OR 'huma clonidine'/exp OR 'huma clonidine' OR 'hypodine'/exp OR hypodine OR  
'isoglaucan'/exp OR isoglaucan OR 'jenloga'/exp OR jenloga OR 'kapvay'/exp OR kapvay OR 'melzin'/exp OR melzin OR  
'normopresan'/exp OR normopresan OR 'normopresin'/exp OR normopresin OR 'paracefan'/exp OR paracefan OR 'sulmidine'/exp OR  
sulmidine OR 'taitecin'/exp OR taitecin OR 'tenso timelets'/exp OR 'tenso timelets' OR (tenso AND timelets) OR 'adrenergic alpha  
agonists'/exp OR 'adrenergic alpha agonists' OR (adrenergic AND alpha AND ('agonists'/exp OR agonists)) OR 'adrenergic alpha-  
agonists'/exp OR 'adrenergic alpha-agonists' OR (adrenergic AND 'alpha agonists') OR 'alpha adrenergic agent'/exp OR 'alpha  
adrenergic agent' OR (alpha AND adrenergic AND ('agent'/exp OR agent)) OR 'alpha adrenergic agonist'/exp OR 'alpha adrenergic  
agonist' OR (alpha AND adrenergic AND ('agonist'/exp OR agonist)) OR 'alpha adrenergic receptor agent'/exp OR 'alpha adrenergic  
receptor agent' OR (alpha AND adrenergic AND ('receptor'/exp OR receptor) AND ('agent'/exp OR agent)) OR 'alpha adrenergic  
receptor agonist'/exp OR 'alpha adrenergic receptor agonist' OR (alpha AND adrenergic AND ('receptor'/exp OR receptor) AND  
( 'agonist'/exp OR agonist)) OR 'alpha adrenergic receptor stimulant'/exp OR 'alpha adrenergic receptor stimulant' OR (alpha AND  
adrenergic AND ('receptor'/exp OR receptor) AND ('stimulant'/exp OR stimulant)) OR 'alpha adrenergic receptor stimulator'/exp OR  
'alpha adrenergic receptor stimulator' OR (alpha AND adrenergic AND ('receptor'/exp OR receptor) AND ('stimulator'/exp OR

stimulator)) OR 'alpha adrenergic stimulant'/exp OR 'alpha adrenergic stimulant' OR (alpha AND adrenergic AND ('stimulant'/exp OR stimulant)) OR 'alpha adrenergic stimulating agent'/exp OR 'alpha adrenergic stimulating agent' OR (alpha AND adrenergic AND stimulating AND ('agent'/exp OR agent)) OR 'alpha adrenergic stimulator'/exp OR 'alpha adrenergic stimulator' OR (alpha AND adrenergic AND ('stimulator'/exp OR stimulator)) OR 'alpha adrenoceptor agonist'/exp OR 'alpha adrenoceptor agonist' OR (alpha AND ('adrenoceptor'/exp OR adrenoceptor) AND ('agonist'/exp OR agonist)) OR 'alpha adrenoceptor stimulant'/exp OR 'alpha adrenoceptor stimulant' OR (alpha AND ('adrenoceptor'/exp OR adrenoceptor) AND ('stimulant'/exp OR stimulant)) OR 'alpha adrenoceptor stimulating agent'/exp OR 'alpha adrenoceptor stimulating agent' OR (alpha AND ('adrenoceptor'/exp OR adrenoceptor) AND stimulating AND ('agent'/exp OR agent)) OR 'alpha adrenoceptor stimulator'/exp OR 'alpha adrenoceptor stimulator' OR (alpha AND ('adrenoceptor'/exp OR adrenoceptor) AND ('stimulator'/exp OR stimulator)) OR 'alpha agonist'/exp OR 'alpha agonist' OR (alpha AND ('agonist'/exp OR agonist)) OR 'alpha sympathicomimetic'/exp OR 'alpha sympathicomimetic' OR (alpha AND ('sympathicomimetic'/exp OR sympathicomimetic)) OR 'alpha sympathicomimetic agent'/exp OR 'alpha sympathicomimetic agent' OR (alpha AND ('sympathicomimetic'/exp OR sympathicomimetic) AND ('agent'/exp OR agent)) OR 'noradrenalin agonist'/exp OR 'noradrenalin agonist' OR (('noradrenalin'/exp OR noradrenalin) AND ('agonist'/exp OR agonist)) OR 'noradrenergic agonist'/exp OR 'noradrenergic agonist' OR (noradrenergic AND ('agonist'/exp OR agonist)) OR 'noradrenergic receptor stimulating agent'/exp OR 'noradrenergic receptor stimulating agent' OR (noradrenergic AND ('receptor'/exp OR receptor) AND stimulating AND ('agent'/exp OR agent)) OR 'dexmedetomidine'/exp OR dexmedetomidine OR 'dexdomitor'/exp OR dexdomitor OR 'dexdor'/exp OR dexdor OR 'dexmedetomidine hydrochloride'/exp OR 'dexmedetomidine hydrochloride' OR (('dexmedetomidine'/exp OR dexmedetomidine) AND ('hydrochloride'/exp OR hydrochloride)) OR precede OR 'primadex'/exp OR primadex OR 'sileo'/exp OR sileo OR 'gaba agonist'/exp OR 'gaba agonist' OR (('gaba'/exp OR gaba) AND ('agonist'/exp OR agonist)) OR 'gaba agonists'/exp OR 'gaba agonists' OR (('gaba'/exp OR gaba) AND ('agonists'/exp OR agonists)) OR 'gaba receptor agonist'/exp OR 'gaba receptor agonist' OR (('gaba'/exp OR gaba) AND ('receptor'/exp OR receptor) AND ('agonist'/exp OR agonist)) OR 'gaba receptor stimulant'/exp OR 'gaba receptor stimulant' OR (('gaba'/exp OR gaba) AND ('receptor'/exp OR receptor) AND ('stimulant'/exp OR stimulant)) OR 'gaba receptor stimulating agent'/exp OR 'gaba receptor stimulating agent' OR (('gaba'/exp OR gaba) AND ('receptor'/exp OR receptor) AND stimulating AND ('agent'/exp OR agent)) OR 'gaba receptor stimulator'/exp OR 'gaba receptor stimulator' OR (('gaba'/exp OR gaba) AND ('receptor'/exp OR receptor) AND ('stimulator'/exp OR stimulator)) OR 'gabaergic receptor agonist'/exp OR 'gabaergic receptor agonist' OR (gabaergic AND ('receptor'/exp OR receptor) AND ('agonist'/exp OR agonist)) OR 'gabaergic receptor stimulant'/exp OR 'gabaergic receptor stimulant' OR (gabaergic AND ('receptor'/exp OR receptor) AND ('stimulant'/exp OR stimulant)) OR 'gabaergic receptor stimulating agent'/exp OR 'gabaergic receptor stimulating agent' OR (gabaergic AND ('receptor'/exp OR receptor) AND stimulating AND ('agent'/exp OR agent)) OR 'gabaergic receptor stimulator'/exp OR 'gabaergic receptor stimulator' OR (gabaergic AND ('receptor'/exp

OR receptor) AND ('stimulator'/exp OR stimulator)) OR 'gabamimetic'/exp OR gabamimetic OR 'gabamimetic agent'/exp OR 'gabamimetic agent' OR (('gabamimetic'/exp OR gabamimetic) AND ('agent'/exp OR agent)) OR 'gamma aminobutyric acid agonist'/exp OR 'gamma aminobutyric acid agonist' OR (gamma AND aminobutyric AND ('acid'/exp OR acid) AND ('agonist'/exp OR agonist)) OR 'gamma aminobutyric acid receptor agonist'/exp OR 'gamma aminobutyric acid receptor agonist' OR (gamma AND aminobutyric AND ('acid'/exp OR acid) AND ('receptor'/exp OR receptor) AND ('agonist'/exp OR agonist)) OR 'gamma aminobutyric acid receptor stimulant'/exp OR 'gamma aminobutyric acid receptor stimulant' OR (gamma AND aminobutyric AND ('acid'/exp OR acid) AND ('receptor'/exp OR receptor) AND ('stimulant'/exp OR stimulant)) OR 'gamma aminobutyric acid receptor stimulating agent'/exp OR 'gamma aminobutyric acid receptor stimulating agent' OR (gamma AND aminobutyric AND ('acid'/exp OR acid) AND ('receptor'/exp OR receptor) AND stimulating AND ('agent'/exp OR agent)) OR 'gamma aminobutyric acid receptor stimulator'/exp OR 'gamma aminobutyric acid receptor stimulator' OR (gamma AND aminobutyric AND ('acid'/exp OR acid) AND ('receptor'/exp OR receptor) AND ('stimulator'/exp OR stimulator)) OR 'n-methyl d-aspartate antagonist'/exp OR 'n-methyl d-aspartate antagonist' OR ('n methyl' AND ('d aspartate'/exp OR 'd aspartate') AND antagonist) OR 'n-methyl d-aspartate blocker'/exp OR 'n-methyl d-aspartate blocker' OR ('n methyl' AND ('d aspartate'/exp OR 'd aspartate') AND blocker) OR 'n-methyl d-aspartate blocking agent'/exp OR 'n-methyl d-aspartate blocking agent' OR ('n methyl' AND ('d aspartate'/exp OR 'd aspartate') AND blocking AND ('agent'/exp OR agent)) OR 'n-methyl d-aspartate receptor antagonist'/exp OR 'n-methyl d-aspartate receptor antagonist' OR ('n methyl' AND ('d aspartate'/exp OR 'd aspartate') AND ('receptor'/exp OR receptor) AND antagonist) OR 'n-methyl d-aspartate receptor blocker'/exp OR 'n-methyl d-aspartate receptor blocker' OR ('n methyl' AND ('d aspartate'/exp OR 'd aspartate') AND ('receptor'/exp OR receptor) AND blocker) OR 'n-methyl d-aspartate receptor blocking agent'/exp OR 'n-methyl d-aspartate receptor blocking agent' OR ('n methyl' AND ('d aspartate'/exp OR 'd aspartate') AND ('receptor'/exp OR receptor) AND blocking AND ('agent'/exp OR agent)) OR 'n-methyl d-aspartic acid antagonist'/exp OR 'n-methyl d-aspartic acid antagonist' OR ('n methyl' AND 'd aspartic' AND ('acid'/exp OR acid) AND antagonist) OR 'n-methyl d-aspartic acid blocker'/exp OR 'n-methyl d-aspartic acid blocker' OR ('n methyl' AND 'd aspartic' AND ('acid'/exp OR acid) AND blocker) OR 'n-methyl d-aspartic acid blocking agent'/exp OR 'n-methyl d-aspartic acid blocking agent' OR ('n methyl' AND 'd aspartic' AND ('acid'/exp OR acid) AND blocking AND ('agent'/exp OR agent)) OR 'n-methyl d-aspartic acid receptor antagonist'/exp OR 'n-methyl d-aspartic acid receptor antagonist' OR ('n methyl' AND 'd aspartic' AND ('acid'/exp OR acid) AND ('receptor'/exp OR receptor) AND antagonist) OR 'n-methyl d-aspartic acid receptor blocker'/exp OR 'n-methyl d-aspartic acid receptor blocker' OR ('n methyl' AND 'd aspartic' AND ('acid'/exp OR acid) AND ('receptor'/exp OR receptor) AND blocker) OR 'n-methyl d-aspartic acid receptor blocking agent'/exp OR 'n-methyl d-aspartic acid receptor blocking agent' OR ('n methyl' AND 'd aspartic' AND ('acid'/exp OR acid) AND ('receptor'/exp OR receptor) AND blocking AND ('agent'/exp OR agent)) OR 'n-methyl dextro aspartate antagonist'/exp OR 'n-methyl dextro aspartate antagonist' OR ('n methyl' AND dextro AND ('aspartate'/exp OR aspartate) AND antagonist) OR 'n-methyl dextro



aspartate blocker'/exp OR 'n-methyl dextro aspartate blocker' OR ('n methyl' AND dextro AND ('aspartate'/exp OR aspartate) AND blocker) OR 'n-methyl dextro aspartate blocking agent'/exp OR 'n-methyl dextro aspartate blocking agent' OR ('n methyl' AND dextro AND ('aspartate'/exp OR aspartate) AND blocking AND ('agent'/exp OR agent)) OR 'n-methyl dextro aspartate receptor antagonist'/exp OR 'n-methyl dextro aspartate receptor antagonist' OR ('n methyl' AND dextro AND ('aspartate'/exp OR aspartate) AND ('receptor'/exp OR receptor) AND antagonist) OR 'n-methyl dextro aspartate receptor blocker'/exp OR 'n-methyl dextro aspartate receptor blocker' OR ('n methyl' AND dextro AND ('aspartate'/exp OR aspartate) AND ('receptor'/exp OR receptor) AND blocker) OR 'n-methyl dextro aspartate receptor blocking agent'/exp OR 'n-methyl dextro aspartate receptor blocking agent' OR ('n methyl' AND dextro AND ('aspartate'/exp OR aspartate) AND ('receptor'/exp OR receptor) AND blocking AND ('agent'/exp OR agent)) OR 'n-methyl dextro aspartic acid antagonist'/exp OR 'n-methyl dextro aspartic acid antagonist' OR ('n methyl' AND dextro AND aspartic AND ('acid'/exp OR acid) AND antagonist) OR 'n-methyl dextro aspartic acid blocker'/exp OR 'n-methyl dextro aspartic acid blocker' OR ('n methyl' AND dextro AND aspartic AND ('acid'/exp OR acid) AND blocker) OR 'n-methyl dextro aspartic acid blocking agent'/exp OR 'n-methyl dextro aspartic acid blocking agent' OR ('n methyl' AND dextro AND aspartic AND ('acid'/exp OR acid) AND blocking AND ('agent'/exp OR agent)) OR 'n-methyl dextro aspartic acid receptor antagonist'/exp OR 'n-methyl dextro aspartic acid receptor antagonist' OR ('n methyl' AND dextro AND aspartic AND ('acid'/exp OR acid) AND ('receptor'/exp OR receptor) AND antagonist) OR 'n-methyl dextro aspartic acid receptor blocker'/exp OR 'n-methyl dextro aspartic acid receptor blocker' OR ('n methyl' AND dextro AND aspartic AND ('acid'/exp OR acid) AND ('receptor'/exp OR receptor) AND blocker) OR 'nmda antagonist'/exp OR 'nmda antagonist' OR (('nmda'/exp OR nmda) AND antagonist) OR 'nmda blocker'/exp OR 'nmda blocker' OR (('nmda'/exp OR nmda) AND blocker) OR 'nmda blocking agent'/exp OR 'nmda blocking agent' OR (('nmda'/exp OR nmda) AND blocking AND ('agent'/exp OR agent)) OR 'nmda receptor antagonist'/exp OR 'nmda receptor antagonist' OR (('nmda'/exp OR nmda) AND ('receptor'/exp OR receptor) AND antagonist) OR 'nmda receptor antagonists'/exp OR 'nmda receptor antagonists' OR (('nmda'/exp OR nmda) AND ('receptor'/exp OR receptor) AND antagonists) OR 'nmda receptor blocker'/exp OR 'nmda receptor blocker' OR (('nmda'/exp OR nmda) AND ('receptor'/exp OR receptor) AND blocker) OR 'nmda receptor blocking agent'/exp OR 'nmda receptor blocking agent' OR (('nmda'/exp OR nmda) AND ('receptor'/exp OR receptor) AND blocking AND ('agent'/exp OR agent))

39. #15 or #16 or #17 or #18 or #19 or #20 or #21 or #22 or #23 or #24 or #25 or #26 or #27 or #28 or #29 or #30 or #31 or #32 or #33 or #34 or #35 or #36 or #37 or #38

40. 'cognitive accessibility' or 'cognitive balance' or 'cognitive dissonance' or 'cognitive function' or 'cognitive structure' or 'cognitive symptoms' or 'cognitive task' or 'cognitive thinking' or 'neurobehavioral manifestations' or 'neurobehavioural manifestations' or 'volition' or 'cognition disorder' or 'cognition disorders' or 'cognitive defects' or 'cognitive deficit' or 'cognitive disability' or 'cognitive disorder' or 'cognitive disorders' or 'cognitive dysfunction' or 'cognitive impairment' or 'delirium, dementia, amnestic, cognitive

disorders' or 'overinclusion' or 'response interference' or 'behavior, child' or 'behaviour, child' or 'child behavior' or 'infant behavior' or 'infant behavior' or 'disorder, learning' or 'impaired learning' or 'learning deficit' or 'learning difficulty' or 'learning disabilities' or 'learning disability' or 'learning disorders' or 'learning disturbance' or 'learning impairment' or 'learning problem' or 'abnormal development' or 'child development disorder' or 'development disorder' or 'developmental disabilities'

41. 'developmental disorder'/exp or 'Learning disorder'/exp or 'Child behavior'/exp or 'Postoperative cognitive dysfunction'/exp or 'Cognitive defect'/exp or 'Cognition assessment'/exp or 'Cognition'/exp

42. #40 or #41

43. #14 and #39 and #42

44. not (('animal'/exp or 'nonhuman'/exp) not 'human'/exp)

**CINAHL**

- S41 S6 AND S32 AND S40
- S40 S33 OR S34 OR S35 OR S36 OR S37 OR S38 OR S39
- S39 Cognition Disorder OR Cognition Disorders OR Cognitive Disorders OR Cognitive Disorder OR Deficiency, Mental OR Disability, Intellectual OR Mental Deficiency OR Mental Retardation OR Mental Retardation, Psychosocial OR Retardation, Mental OR Intellectual Disabilities OR Learning Disabilities OR Learning Disorders, Chronic OR Cognitive Symptoms OR Signs and Symptoms, Neurobehavioral OR Cognitive Symptom OR Neurobehavioral Manifestation OR Neurobehavioral Sign and Symptom OR Neurobehavioral Sign Symptom OR Neurobehavioral Signs and Symptoms OR Neurobehavioral Signs Symptoms OR Neurobehavioural Manifestation OR Neurobehavioural Signs and Symptoms OR Signs and Symptoms, Neurobehavioural OR Disabilities, Developmental OR Developmental Disability OR Child Development Disorder OR Children Development Disorders OR Infant Development Disorders
- S38 (MH "Developmental Disabilities")
- S37 (MH "Neurobehavioral Manifestations+")
- S36 (MH "Intellectual Disability+")
- S35 (MH "Child Development Disorders+")
- S34 (MH "Cognition Disorders+")
- S33 (MH "Cognition+")
- S32 S7 OR S8 OR S9 OR S10 OR S11 OR S12 OR S13 OR S14 OR S15 OR S16 OR S17 OR S18 OR S19 OR S20 OR S21 OR S22 OR S23 OR S24 OR S25 OR S26 OR S27 OR S28 OR S29 OR S30 OR S31
- S31 Anesthesias, General OR General anesthetics OR general anesthesia OR Anesthesias, Inhalation OR Anesthesias, Intravenous OR Anesthesia, Obstetrical OR Anesthesias, Obstetrical OR Hypnosis, Anaesthetic OR Hypnosis, Anaesthetics OR Anaesthesia, General OR Anaesthesias, General OR General anaesthesias OR general anaesthesia OR Anaesthesia, Inhalation OR Anaesthesias, Inhalation OR Anaesthesia, Intravenous OR Anaesthesias, Intravenous OR Anaesthesia, Obstetrical OR Anaesthesias, Obstetrical OR Hypnosis, Anaesthetic OR Hypnosis, Anaesthetics OR General Anesthetics OR General Anesthetics OR Anesthetic, General OR Inhalation Anesthetics OR Anesthetic, Inhalation OR General Anaesthetics OR Anaesthetic, General OR General Anaesthetics OR Anaesthetic, General OR Anaesthetics,

Inhalation OR Inhalation Anaesthetics OR Anaesthetic, Inhalation OR Barbiturates OR Fluothane OR Desflurane OR Anesthetic, Intravenous OR Intravenous Anesthetics OR Intravenous Anesthetic OR Anaesthetics, Intravenous OR Anaesthetic, Intravenous OR Intravenous Anaesthetics OR Intravenous Anaesthetic OR Anesthetic OR Anesthetics OR Anaesthetic OR Anaesthetics OR Sedatives, Barbiturate OR Sedatives, Barbiturates OR Sedatives, Nonbarbiturate OR Sedatives, Nonbarbiturates OR Sodium Oxybate OR Alprazolam OR Chlordiazepoxide OR Clorazepate Dipotassium OR Flunitrazepam OR Flurazepam OR Lorazepam OR Oxazepam OR Temazepam OR Quazepam OR Catapres OR Catapresan OR Catapressan OR Chlophazolin OR Clofelin OR Clofenil OR Clopheline OR Clonidine Dihydrochloride OR Clonidine Monohydrobromide OR Clonidine Monohydrochloride OR Dixarit OR Gemiton OR Hemiton OR Isoglaucan OR Klofelin OR Klofenil OR Clonidine Hydrochloride OR Dexmedetomidine OR Adrenergic Alpha-Agonists OR Adrenergic Alpha-Agonist OR Alpha-Adrenergic Receptor Agonists OR Adrenergic Alpha-Agonist OR Alpha Agonists OR Alpha Agonists, Adrenergic OR Alpha-Adrenergic Receptor Agonist OR Receptor Agonists, Adrenergic Alpha OR Receptor Agonists, Alpha-Adrenergic OR Gamma-Aminobutyric Acid Agonists OR GABA Agonist OR Agonists, GABA OR Agonist GABA OR Gamma Aminobutyric Acid Agonist OR Amino Acids, Excitatory, Antagonists OR Glutamate Antagonists OR Amino Acid Antagonists, Excitatory OR Amino Acid Antagonist Excitatory OR Amino Acids Excitatory Antagonist OR Glutamate Antagonist OR Early Exposure

- S30 (MH "Adrenergic Alpha-Agonists+")
- S29 (MH "Excitatory Amino Acid Antagonists+")
- S28 (MH "GABA Modulators+")
- S27 (MH "GABA Agonists+")
- S26 (MH "Clonidine")
- S25 (MH "Anesthetics+")
- S24 (MH "Ketamine")
- S23 (MH "Antianxiety Agents, Benzodiazepine+")
- S22 (MH "Midazolam")
- S21 (MH "Sedatives, Barbiturate+")
- S20 (MH "Barbiturates+")

S19 (MH "Thiopental")

S18 (MH "Propofol")

S17 (MH "Nitrous Oxide")

S16 (MH "Halothane")

S15 (MH "Isoflurane")

S14 (MH "Sevoflurane")

S13 (MH "Isoflurane")

S12 (MH "Anesthetics, Intravenous+")

S11 (MH "Anesthetics, Inhalation+")

S10 (MH "Anesthesia, Intravenous")

S9 (MH "Anesthesia, Inhalation")

S8 (MH "Anesthetics, General+")

S7 (MH "Anesthesia, General+")

S6 S1 OR S2 OR S3 OR S4 OR S5

S5 Children OR Childhood OR Child, Abandoned OR Child, Adopted OR Child, Disabled OR Child, Foster OR Child, Gifted OR Child, Hospitalized OR Child, Institutionalized OR Child, Medically Fragile OR Child, Preschool OR Infants OR Infancy OR Infant, Drug-Exposed OR Infant, High Risk OR Infant, Hospitalized OR Newborn Infant OR Newborn Infants OR Neonate OR Neonates OR Baby Newborn OR Adolescent OR Adolescent, Hospitalized OR Adolescents OR Youth OR Youths OR Teenager OR Teenagers OR Teens OR Teen Ager OR Teen Agers OR Toddler OR Toddlers

S4 (MH "Child, Preschool")

S3 (MH "Adolescence+")

S2 (MH "Child+")

S1 (MH "Infant, Newborn+")

**Web of Science**

|    |                                                                                                                                                                                                                                                                                                                                                                                                                                                                                                                                                                                                                                                                                                                                                                                                                                                                                                                                                                                                                                    |
|----|------------------------------------------------------------------------------------------------------------------------------------------------------------------------------------------------------------------------------------------------------------------------------------------------------------------------------------------------------------------------------------------------------------------------------------------------------------------------------------------------------------------------------------------------------------------------------------------------------------------------------------------------------------------------------------------------------------------------------------------------------------------------------------------------------------------------------------------------------------------------------------------------------------------------------------------------------------------------------------------------------------------------------------|
| #4 | #3 AND #2 AND #1 NOT SU=(Veterinary Sciences) NOT TS=(mouse or mice or rat)<br>Refined by: LANGUAGES: ( ENGLISH )                                                                                                                                                                                                                                                                                                                                                                                                                                                                                                                                                                                                                                                                                                                                                                                                                                                                                                                  |
| #3 | (Cognition OR Cognition disorder OR Cognition disorders OR Cognition impairment OR Cognition Impairments OR Cognition deficit OR Cognition deficits OR Cognitive defect OR Cognitive defects OR Cognitive disorder OR Cognitive disorders OR Cognitive impairment OR Cognitive impairments OR Cognitive deficit OR Cognitive deficits OR Cognitive Dysfunction OR Cognitive Dysfunctions OR Development disability OR Development disabilities OR Development disabilities OR Developmental disabilities OR Child development deviation OR Child development disorder OR Child development disorders OR Developmental delay disorder OR Developmental delay disorders OR Neurodevelopment OR Neurodevelopment outcome OR Learning impairment OR Learning disability OR Learning disabilities OR Behavioral impairment OR Behavioral change OR Behavioral Changes OR Neurodegeneration OR Intellectual deficiency OR Intellectual deficiencies OR Neurobehavior OR Neurobehavioral manifestation OR Neurobehavioral manifestations) |
| #2 | (General Anesthesia OR General Anaesthesia OR General Anesthetic OR General Anesthetics OR General Anaesthetic OR General Anaesthetics OR Intravenous Anesthetic OR Intravenous Anaesthetic OR Intravenous Anesthetics OR Intravenous Anaesthetics OR Inhalation Anesthesia OR Inhalation Anaesthesia OR Isoflurane OR Desflurane OR Sevoflurane OR Nitrous Oxide OR Halothane OR Propofol OR Thiopental OR Ketamine OR Clonidine OR Dexmedetomidine OR Midazolam OR Benzodiazepine OR GABA-Agonist OR NMDA-Antagonist OR Early Exposure OR Methyl-D-Aspartate OR Gamma Aminobutyric Acid Agonist OR Gamma Aminoburytic Acid Agonists OR Sedative OR Sedatives)                                                                                                                                                                                                                                                                                                                                                                    |
| #1 | (Child OR Children OR Childhood OR Infant OR Infants OR Infancy OR Adolescent OR Adolescents OR Adolescence OR Preschool Child OR Preschool Children OR School Child OR School Children OR Baby OR Babies OR Newborn OR Newborns OR Newborn Child OR Newborn Children OR Neonate OR Neonates OR Toddler OR Toddlers OR Teenager OR Teenagers OR Teenage)                                                                                                                                                                                                                                                                                                                                                                                                                                                                                                                                                                                                                                                                           |

## **Cochrane/CENTRAL**

ID Search

#1 MeSH descriptor: [Child] explode all trees

#2 MeSH descriptor: [Infant] explode all trees

#3 MeSH descriptor: [Adolescent] explode all trees

#4 Child or Children or child, preschool or children, preschool or preschool child or preschool children or Infant or Infants or infant, newborn or infants, newborn or neonate or neonates or newborn infant or newborn infants or newborn or newborns or adolescence or adolescent, female or adolescent, male or adolescent or adolescents, female or adolescents, male or adolescents or female adolescent or female adolescents or male adolescent or male adolescents or teen or teenager or teenagers or teens or youth or youths or Baby or Babies or Toddler or Toddlers or Infancy or Childhood:ti,ab,kw (Word variations have been searched)

#5 #1 or #2 or #3 or #4

#6 MeSH descriptor: [Anesthesia, General] explode all trees

#7 MeSH descriptor: [Anesthetics] explode all trees

#8 MeSH descriptor: [Anesthetics, General] explode all trees

#9 MeSH descriptor: [Anesthetics, Inhalation] explode all trees

#10 MeSH descriptor: [Nitrous Oxide] explode all trees

#11 MeSH descriptor: [Anesthetics, Intravenous] explode all trees

#12 MeSH descriptor: [Propofol] explode all trees

#13 MeSH descriptor: [Hypnotics and Sedatives] explode all trees

#14 MeSH descriptor: [Thiopental] explode all trees

#15 MeSH descriptor: [GABA Modulators] explode all trees

#16 MeSH descriptor: [GABA Agonists] explode all trees

#17 MeSH descriptor: [Excitatory Amino Acid Antagonists] explode all trees

#18 MeSH descriptor: [Adrenergic alpha-2 Receptor Agonists] explode all trees

#19 MeSH descriptor: [Benzodiazepines] explode all trees

#20 Anesthesia, General or Anesthesias, General or General Anesthesia or General Anesthesias or Anesthesia, Inhalation or Inhalation Anesthesia or Insufflation Anesthesia or Anesthesia, Insufflation or Anesthesia, Intravenous or Anesthesias, Intravenous or Intravenous Anesthesias or Intravenous Anesthesias or Anesthetics, General or General Anesthetic or Anesthetics, Inhalation or Inhalation Anesthetics or Anesthetic Gases or Gases, Anesthetic or Anesthetics, Intravenous or Clonidine or Clonidine Dihydrochloride

or Dihydrochloride, Clonidine or Clonidine Hydrochloride or Hydrochloride, Clonidine or Clonidine Monohydrochloride Monohydrochloride, Clonidine or Clonidine Monohydrobromide Monohydrobromide, Clonidine or Boehringer Ingelheim Brand of Clonidine Hydrochloride or Adrenergic alpha 2 Receptor Agonists or Adrenergic alpha2 Agonists or Adrenergic alpha2 Agonists or alpha2 Agonists, Adrenergic or Adrenergic alpha-2 Agonists or Adrenergic alpha 2 Agonists or Agonists, Adrenergic alpha-2 or alpha-2 Agonists, Adrenergic or Adrenergic alpha-2 Receptor Agonist or Adrenergic alpha 2 Receptor Agonist or Dexmedetomidine or Hospira Brand of Dexmedetomidine Hydrochloride or Dexmedetomidine Hydrochloride or Hydrochloride, Dexmedetomidine or Midazolam or Midazolam Maleate or Maleate, Midazolam or Midazolam Hydrochloride or Hydrochloride, Midazolam or Benzodiazepine or Benzodiazepine Compounds or Benzodiazepines or Intravenous Anesthetics or Anesthetic Drug or Anesthetic Drugs or Drugs, Anesthetic or Drug, Anesthetic or Anesthetic Agent or Anesthetic Agents or Agents, Anesthetic or Anesthetic Effect or Effect, Anesthetic or Anesthetic Effects or Effects, Anesthetic or Isoflurane or Desflurane or Sevoflurane or Halothane or Nitrous Oxide or Oxide, Nitrous or Propofol or Zeneca Brand of Propofol or Astra Brand of Propofol or AstraZeneca Brand of Propofol or Alpha Brand of Propofol or Juste Brand of Propofol or Propofol Fresenius or Fresenius Kabi Brand of Propofol or Propofol MCT or Fresenius Brand of Propofol or Propofol Rovi or Rovi Brand of Propofol or Propofol-Lipuro or Braun Brand of Propofol or Pisa Brand of Propofol or Schering Brand of Propofol or Curamed Brand of Propofol or Parnell Brand of Propofol or Propofol Abbott or Abbott Brand of Propofol or Hypnotics and Sedatives or Sedatives and Hypnotics or Hypnotic Effect or Effect, Hypnotic or Hypnotic Effects or Effects, Hypnotic or Sedatives or Hypnotics or Sedative Effect or Effect, Sedative or Sedative Effects or Effects, Sedative or Thiopental or Rhone Merieux Brand of Thiopental Sodium or Merial Brand of Thiopental Sodium or Abbott Brand of Thiopental Sodium or Pisa Brand of Thiopental Sodium or Thiopental Nycomed or Nycomed Brand of Thiopental Sodium or Thiopental Sodium or Braun Brand of Thiopental Sodium or Altana Pharma Brand of Thiopental Sodium or Pharmtech Brand of Thiopental Sodium or GABA Modulators or Modulators, GABA or GABAergic Modulators or Modulators, GABAergic or Gamma-Aminobutyric Acid Modulators or Acid Modulators, gamma-Aminobutyric or Modulators, gamma-Aminobutyric Acid or Gamma Aminobutyric Acid Modulators or GABA-A Receptor Agonists or Agonists, GABA-A Receptor or GABA A Receptor Agonists or Receptor Agonists, GABA-A or GABA-A Receptor Agonist or Agonist, GABA-A Receptor or GABA A Receptor Agonist or Receptor Agonist, GABA-A or GABA-A Agonists or Agonists, GABA-A or GABA A Agonists or Agonists, GABA or gamma-Aminobutyric Acid Agonists or Acid Agonists, gamma-Aminobutyric or Agonists, gamma-Aminobutyric Acid or Gamma Aminobutyric Acid Agonists or GABA Receptor Agonists or Agonists, GABA Receptor or Receptor Agonists, GABA or Gamma-Aminobutyric Acid Agonist or Acid Agonist, gamma-Aminobutyric or Agonist, gamma-Aminobutyric Acid or Gamma Aminobutyric Acid Agonist or GABA Agonist or Agonist, GABA or GABA Receptor Agonist or Agonist, GABA Receptor or Receptor Agonist, GABA or Ketamine or Ketamine Hydrochloride or Excitatory Amino Acid Antagonists or Antagonists, Excitatory Amino Acid or Amino Acids,



Excitatory, Antagonists or Glutamate Receptor Antagonists or Antagonists, Glutamate Receptor or Receptor Antagonists, Glutamate or EAA Antagonists or Antagonists, EAA or Glutamate Antagonists or Antagonists, Glutamate or Amino Acid Antagonists, Excitatory

#21 #6 or #7 or #8 or #9 or #10 or #11 or #12 or #13 or #14 or #15 or #16 or #17 or #18 or #19 or #20

#22 MeSH descriptor: [Cognition] explode all trees

#23 MeSH descriptor: [Cognition Disorders] explode all trees

#24 MeSH descriptor: [Neurodevelopmental Disorders] explode all trees

#25 MeSH descriptor: [Developmental Disabilities] explode all trees

#26 MeSH descriptor: [Neurobehavioral Manifestations] explode all trees

#27 Disorder, Cognition or Disorders, Cognition or Cognition or Disorder, Mental or Disorders, Mental or Mental Disorder or Behavior Disorders or Disorders, Behavior or Mental Disorders, Severe or Disorder, Severe Mental or Disorders, Severe Mental or Mental Disorder, Severe or Severe Mental Disorder or Severe Mental Disorders or Cognitive Impairments or Cognitive Impairment or Impairment, Cognitive or Impairments, Cognitive or Cognitive Deficits or Cognitive Deficit or Deficit, Cognitive or Deficits, Cognitive or Cognitive Defects or Cognitive Defect or Defect, Cognitive or Defects, Cognitive or Specific Learning Disorder or Disorder, Specific Learning or Learning Disorder, Specific or Learning Disorders, Specific or Specific Learning Disorders or Neurodevelopmental Disorders or Disorder, Neurodevelopmental or Disorders, Neurodevelopmental or Neurodevelopmental Disorder or Mental Disorders Diagnosed in Childhood or Disorders Usually Diagnosed in Infancy, Childhood or Adolescence or Child Mental Disorders or Child Mental Disorder or Disorder, Child Mental or Disorders, Child Mental or Mental Disorder, Child or Mental Disorders, Child or Developmental Disabilities or Disabilities, Developmental or Developmental Disability or Disability, Developmental or Developmental Delay Disorders or Developmental Delay Disorder or Neurobehavioral Manifestations or Manifestation, Neurobehavioral or Manifestations, Neurobehavioral or Neurobehavioral Manifestation or Signs and Symptoms, Neurobehavioral or Cognitive Manifestations or Cognitive Manifestation or Manifestation, Cognitive or Manifestations, Cognitive or Neurobehavioral Signs and Symptoms

#28 #22 or #23 or #24 or #25 or #26 or #27

#29 #5 and #21 and #28

**eTable 1.** All Domains and Subdomains Evaluated in Studies of Potential Neurotoxic Effects of Anesthetic

| Domain                          | Subdomains                               |
|---------------------------------|------------------------------------------|
| Academics                       | Math                                     |
|                                 | Writing                                  |
|                                 | Reading                                  |
|                                 | Spelling                                 |
| Adaptive behavior               | Social                                   |
|                                 | Community participation and independence |
|                                 | Problem solving                          |
|                                 | Daily living skills                      |
| Behavioral problems             | Personal/social                          |
|                                 | Externalizing problems                   |
|                                 | Internalizing problems                   |
|                                 | Social problems                          |
| Cognition                       | Thought problems                         |
|                                 |                                          |
|                                 |                                          |
|                                 |                                          |
| Clinical diagnoses and symptoms | Attention deficit hyperactivity disorder |
|                                 | Autism                                   |
|                                 | Cerebral palsy                           |
|                                 | Developmental delay                      |
|                                 | Post-traumatic stress disorder           |
|                                 | Sleep                                    |
| Executive function              | Memory                                   |
|                                 | Flexibility                              |
|                                 | Attention                                |
|                                 | Inhibition                               |
| General development             | Processing speed                         |
|                                 |                                          |
|                                 |                                          |
|                                 |                                          |
| General health and wellbeing    |                                          |
| Language                        | Verbal intelligence quotient             |
|                                 | Expressive language                      |
|                                 | Receptive language                       |
|                                 | Articulation                             |
| Motor function                  | Fine motor                               |
|                                 | Gross motor                              |
| Nonverbal reasoning             |                                          |
| Sensory                         |                                          |
| Social-cognition                |                                          |

**eTable 2.** All Outcomes Evaluated in Studies of Potential Neurotoxic Effects of Anesthetic and Their Associated Neurodevelopmental Domain and Subdomain Classifications

| Test                    | Description of Score                                                                                | Domain                          | Overall Measure or Subdomain       |
|-------------------------|-----------------------------------------------------------------------------------------------------|---------------------------------|------------------------------------|
| A-TAC                   | The Autism - Tics, ADHD and other Comorbidities Inventory: Autism Spectrum Disorder                 | Clinical diagnoses and symptoms | ASD                                |
| A-TAC                   | The Autism - Tics, ADHD and other Comorbidities Inventory: Learning Disabilities                    | Clinical diagnoses and symptoms | Developmental delay                |
| A-TAC                   | The Autism - Tics, ADHD and other Comorbidities Inventory: Attention Deficit Hyperactivity Disorder | Clinical diagnoses and symptoms | ADHD                               |
| ABAS-II                 | Adaptive Behavior Assessment System-2nd edition Conceptual Composite Score                          | Adaptive behavior               | Overall                            |
| ABAS-II                 | Adaptive Behavior Assessment System-2nd edition General Adaptive Composite Score                    | Adaptive behavior               | Overall                            |
| ABAS-II                 | Adaptive Behavior Assessment System-2nd edition Social Composite Score                              | Adaptive behavior               | Social                             |
| ABAS-II                 | Adaptive Behavior Assessment System-2nd edition Practical Composite Score                           | Adaptive behavior               | Overall                            |
| ABAS-II                 | Adaptive Behavior Assessment System-2nd edition Motor Composite Score                               | Motor function                  | Overall                            |
| ABS                     | Adaptive Behavior Scale Conceptual                                                                  | Adaptive behavior               | Overall                            |
| ABS                     | Adaptive Behavior Scale General Adaptive Composite                                                  | Adaptive behavior               | Overall                            |
| ABS                     | Adaptive Behavior Scale Practical                                                                   | Adaptive behavior               | Overall                            |
| ABS                     | Adaptive Behavior Scale Social                                                                      | Adaptive behavior               | Social                             |
| ADHD                    | Attention Deficit Hyperactivity Disorder Diagnosis                                                  | Clinical diagnoses and symptoms | ADHD                               |
| ADHD                    | ADHD medication use                                                                                 | Clinical diagnoses and symptoms | ADHD                               |
| ADHD RS IV              | ADHD Rating Scale IV Preschool Version Inattention                                                  | Clinical diagnoses and symptoms | ADHD                               |
| ADHD RS IV              | ADHD Rating Scale IV Preschool Version Impulsivity                                                  | Clinical diagnoses and symptoms | ADHD                               |
| AIMS                    | Alberta Infant Motor Scale                                                                          | Motor function                  | Overall                            |
| Ambulation              | Ability to ambulate                                                                                 | Motor function                  | Gross motor                        |
| ASD                     | Autism Spectrum Disorder Diagnoses                                                                  | Clinical diagnoses and symptoms | ASD                                |
| ASQ                     | Ages & Stages Questionnaire Personal/Social                                                         | Adaptive behavior               | Personal/social                    |
| ASQ                     | Ages & Stages Questionnaire Problem Solving                                                         | Adaptive behavior               | Problem solving                    |
| ASQ                     | Ages & Stages Questionnaire Communication                                                           | Language                        | Overall                            |
| ASQ                     | Ages & Stages Questionnaire Fine Motor                                                              | Motor function                  | Fine motor                         |
| ASQ                     | Ages & Stages Questionnaire Gross Motor                                                             | Motor function                  | Gross motor                        |
| Attention (unspecified) | Attention: Spatial Forward                                                                          | Executive function              | Attention                          |
| AvEDI                   | Early Development Instrument (Australia): Language and Cognitive Development                        | Language                        | Unable to be mapped to a subdomain |
| AvEDI                   | Early Development Instrument (Australia version) Developmentally High Risk                          | General development             | Overall                            |

|                 |                                                                                               |                                 |                                          |
|-----------------|-----------------------------------------------------------------------------------------------|---------------------------------|------------------------------------------|
| AvEDI           | Early Development Instrument (Australia): Physical Health and Well-Being                      | General health and wellbeing    | No subdomains for this domain            |
| AvEDI           | Early Development Instrument (Australia): Communication Skills and General Knowledge          | Language                        | Unable to be mapped to a subdomain       |
| AvEDI           | Early Development Instrument (Australia): Emotional Health and Maturity                       | Social-cognition                | No subdomains for this domain            |
| AvEDI           | Early Development Instrument (Australia): Social Knowledge and Competence                     | Social-cognition                | No subdomains for this domain            |
| AVLT            | Rey Auditory Verbal Learning Test Verbal Learning                                             | Executive function              | Memory                                   |
| AVLT            | Rey Auditory Verbal Learning Test Verbal Long-term Memory                                     | Executive function              | Memory                                   |
| AVLT            | Rey Auditory Verbal Learning Test Verbal Recognition Memory                                   | Executive function              | Memory                                   |
| BDS             | Backward Digit Span Test                                                                      | Executive function              | Memory                                   |
| Beery-Buktenica | Beery-Buktenica Developmental Test of Visual Motor Integration                                | Motor function                  | Unable to be mapped to a subdomain       |
| Beery-Buktenica | Beery-Buktenica Developmental Test: Motor Coordination, Grooved Pegboard Dominant Hand        | Motor function                  | Fine motor                               |
| Beery-Buktenica | Beery-Buktenica Developmental Test: Visual Perception, Judgment of Line Orientation           | Motor function                  | Fine motor                               |
| Blindness       | Blindness Diagnosis                                                                           | Clinical diagnoses and symptoms | Vision                                   |
| BNT             | Boston Naming Test                                                                            | Language                        | Overall                                  |
| Bourdon-vos     | Bourdon-vos test                                                                              | Executive function              | Attention                                |
| BPVS            | British Picture Vocabulary Scale                                                              | Language                        | Receptive language                       |
| BRIEF GEC       | Behavior Rating Inventory of the Executive Functions Global Executive Composite               | Executive function              | Overall                                  |
| BRIEF-P GEC     | Behavior Rating Inventory of Executive Function, Preschool version Global Executive Composite | Executive function              | Overall                                  |
| BSID-II MDI     | Bayley Scales of Infant Development-2nd edition Mental Development Index                      | Cognition                       | Overall                                  |
| BSID-II PDI     | Bayley Scales of Infant Development-2nd edition Psychomotor Development Index                 | Motor function                  | Overall                                  |
| BSID-III        | Bayley Scales of Infant Development-3rd edition Functional Pre-Academics                      | Academics                       | Overall                                  |
| BSID-III        | Bayley Scales of Infant Development-3rd edition Community Use                                 | Adaptive behavior               | Community participation and independence |
| BSID-III        | Bayley Scales of Infant Development-3rd edition Home Living                                   | Adaptive behavior               | Daily living skills                      |
| BSID-III        | Bayley Scales of Infant Development-3rd edition Health and Safety                             | Adaptive behavior               | Community participation and independence |
| BSID-III        | Bayley Scales of Infant Development-3rd edition Leisure                                       | Adaptive behavior               | Community participation and independence |
| BSID-III        | Bayley Scales of Infant Development-3rd edition Self-Care                                     | Adaptive behavior               | Daily living skills                      |
| BSID-III        | Bayley Scales of Infant Development-3rd edition Self-Direction                                | Adaptive behavior               | Daily living skills                      |
| BSID-III        | Bayley Scales of Infant Development-3rd edition Adaptive Behavior                             | Adaptive behavior               | Overall                                  |
| BSID-III        | Bayley Scales of Infant Development-3rd edition Cognition Scaled/Composite                    | Cognition                       | Overall                                  |

|          |                                                                                             |                                 |                                    |
|----------|---------------------------------------------------------------------------------------------|---------------------------------|------------------------------------|
| BSID-III | Bayley Scales of Infant Development-3rd edition Receptive Language                          | Language                        | Receptive language                 |
| BSID-III | Bayley Scales of Infant Development-3rd edition Expressive Language                         | Language                        | Expressive language                |
| BSID-III | Bayley Scales of Infant Development-3rd edition Receptive and Expressive Language Composite | Language                        | Overall                            |
| BSID-III | Bayley Scales of Infant Development-3rd edition Communication                               | Language                        | Overall                            |
| BSID-III | Bayley Scales of Infant Development-3rd edition Fine Motor                                  | Motor function                  | Fine motor                         |
| BSID-III | Bayley Scales of Infant Development-3rd edition Gross Motor                                 | Motor function                  | Gross motor                        |
| BSID-III | Bayley Scales of Infant Development-3rd edition Motor Composite                             | Motor function                  | Overall                            |
| BSID-III | Bayley Scales of Infant Development-3rd edition Social-Emotional                            | Social-cognition                | No subdomains for this domain      |
| BSID-III | Bayley Scales of Infant Development-3rd edition Social                                      | Social-cognition                | No subdomains for this domain      |
| CAT      | California Achievement Test Math                                                            | Academics                       | Math                               |
| CAT      | California Achievement Test Phonics                                                         | Academics                       | Reading                            |
| CAT      | California Achievement Test Spelling                                                        | Academics                       | Spelling                           |
| CAT      | California Achievement Test Written Language                                                | Academics                       | Writing                            |
| CBCL     | Child Behavior Checklist Aggressive Behavior                                                | Behavioral problems             | Externalizing problems             |
| CBCL     | Child Behavior Checklist Anxious/Depressed                                                  | Behavioral problems             | Internalizing problems             |
| CBCL     | Child Behavior Checklist Delinquent Behavior                                                | Behavioral problems             | Unable to be mapped to a subdomain |
| CBCL     | Child Behavior Checklist Emotionally Reactive                                               | Behavioral problems             | Internalizing problems             |
| CBCL     | Child Behavior Checklist Externalizing Problems                                             | Behavioral problems             | Externalizing problems             |
| CBCL     | Child Behavior Checklist Internalizing Problems                                             | Behavioral problems             | Internalizing problems             |
| CBCL     | Child Behavior Checklist Total Problems                                                     | Behavioral problems             | Overall                            |
| CBCL     | Child Behavior Checklist Somatic Complaints                                                 | Behavioral problems             | Internalizing problems             |
| CBCL     | Child Behavior Checklist Social Problems                                                    | Behavioral problems             | Social problems                    |
| CBCL     | Child Behavior Checklist Thought Problems                                                   | Behavioral problems             | Thought                            |
| CBCL     | Child Behavior Checklist Withdrawn                                                          | Behavioral problems             | Internalizing problems             |
| CBCL     | Child Behavior Checklist ADHD Problems                                                      | Clinical diagnoses and symptoms | ADHD                               |
| CBCL     | Child Behavior Checklist Attention Problems                                                 | Clinical diagnoses and symptoms | ADHD                               |
| CBCL     | Child Behavior Checklist Pervasive Developmental Problem Scale                              | Clinical diagnoses and symptoms | ASD                                |
| CBCL     | Child Behavior Checklist Sleep Problems                                                     | Clinical diagnoses and symptoms | Sleep                              |
| CDI      | Children's Depression Inventory                                                             | Behavioral problems             | Internalizing problems             |
| CELF     | Clinical Evaluation of Language Fundamentals-Expressive Language Score                      | Language                        | Expressive language                |
| CELF     | Clinical Evaluation of Language Fundamentals-Receptive Language Score                       | Language                        | Receptive language                 |
| CELF     | Clinical Evaluation of Language Fundamentals-Total Language Score                           | Language                        | Overall                            |

|                                 |                                                             |                                 |                                    |
|---------------------------------|-------------------------------------------------------------|---------------------------------|------------------------------------|
| Cerebral Palsy                  | Cerebral Palsy Diagnosis                                    | Clinical diagnoses and symptoms | Cerebral palsy                     |
| Child's Communication Checklist | Child's Communication Checklist                             | Language                        | Overall                            |
| CHQ                             | Child Health Questionnaire                                  | General health and wellbeing    | No subdomains for this domain      |
| CHQ50                           | The Child Health Questionnaire 50 General Behavior          | Behavioral problems             | Overall                            |
| CHQ50                           | The Child Health Questionnaire 50 Bodily Pain               | General health and wellbeing    | Overall                            |
| CHQ50                           | The Child Health Questionnaire 50 Change of Health          | General health and wellbeing    | Overall                            |
| CHQ50                           | The Child Health Questionnaire 50 General Health            | General health and wellbeing    | Overall                            |
| CHQ50                           | The Child Health Questionnaire 50 Physical Functioning      | General health and wellbeing    | Overall                            |
| CHQ50                           | The Child Health Questionnaire 50 Family Activities         | Unable to be mapped to a domain | Unable to be mapped to a subdomain |
| CHQ50                           | The Child Health Questionnaire 50 Family Cohesion           | Unable to be mapped to a domain | Unable to be mapped to a subdomain |
| CHQ50                           | The Child Health Questionnaire 50 Parental Emotional Impact | Unable to be mapped to a domain | Unable to be mapped to a subdomain |
| CHQ50                           | The Child Health Questionnaire 50 Parental Time Impact      | General health and wellbeing    | No subdomains for this domain      |
| CHQ50                           | The Child Health Questionnaire 50 Mental Health             | Social-cognition                | Overall                            |
| CHQ50                           | The Child Health Questionnaire 50 Self-esteem               | Social-cognition                | Overall                            |
| CHQ50                           | The Child Health Questionnaire 50 Social-Emotional Role     | Social-cognition                | Overall                            |
| CHQ50                           | The Child Health Questionnaire 50 Social-Physical Role      | Social-cognition                | Overall                            |
| CLDQ                            | Colorado Learning Difficulties Questionnaire Math Scale     | Academics                       | Math                               |
| CLDQ                            | Colorado Learning Difficulties Questionnaire Reading Scale  | Academics                       | Reading                            |
| CMS                             | Children's Memory Scale Numbers                             | Executive function              | Memory                             |
| CMS                             | Children's Memory Scale Word Lists I                        | Executive function              | Memory                             |
| CMS                             | Children's Memory Scale Word Lists II                       | Executive function              | Memory                             |
| Cons IQ                         | Conscription IQ Test                                        | Cognition                       | Overall                            |
| Counting span                   | Counting span task                                          | Executive function              | Memory                             |
| CPM                             | Raven's Colored Progressive Matrices                        | Nonverbal reasoning             | Overall                            |
| CPRI                            | Child Post-Traumatic Stress Disorder Reaction Index         | Clinical diagnoses and symptoms | PTSD                               |
| CPT2                            | Conner's Continuous Performance Test II Detectability       | Executive function              | Inhibition                         |
| CPT2                            | Conner's Continuous Performance Test II Hit Reaction Time   | Executive function              | Inhibition                         |
| CPT2                            | Conner's Continuous Performance Test II Number Commissions  | Executive function              | Inhibition                         |
| CPT2                            | Conner's Continuous Performance Test II Number Omissions    | Executive function              | Inhibition                         |
| CPT2                            | Conner's Continuous Performance Test II Preservations       | Executive function              | Inhibition                         |

|                                  |                                                                                                     |                                 |                                    |
|----------------------------------|-----------------------------------------------------------------------------------------------------|---------------------------------|------------------------------------|
| CPT2                             | Conner's Continuous Performance Test II Variability                                                 | Executive function              | Inhibition                         |
| CTOPP                            | Comprehensive Test of Phonological Processing: Rapid Naming Composite                               | Language                        | Overall                            |
| CTRS-R:S                         | Conner's' teacher Rating Scale-Revised: Short Form                                                  | Behavioral problems             | Externalizing problems             |
| CVLT-C                           | California Verbal Learning Test-Children Total Trials 1-5                                           | Executive function              | Memory                             |
| DAS-II                           | Differential Abilities Scale Second Edition                                                         | Cognition                       | Overall                            |
| Developmental Delay              | Developmental Delay (overall, language, motor, social, and/or behavioral) diagnosis                 | Clinical diagnoses and symptoms | Developmental delay                |
| DKEFS                            | Delis-Kaplan Executive Function System Trail Making Test Condition 1                                | Executive function              | Flexibility                        |
| DKEFS                            | Delis-Kaplan Executive Function System Trail Making Test Condition 2                                | Executive function              | Flexibility                        |
| DKEFS                            | Delis-Kaplan Executive Function System Trail Making Test Condition 3                                | Executive function              | Flexibility                        |
| DKEFS                            | Delis-Kaplan Executive Function System Trail Making Test Condition 4                                | Executive function              | Flexibility                        |
| DKEFS                            | Delis-Kaplan Executive Function System Trail Making Test Condition 5                                | Executive function              | Flexibility                        |
| DKEFS                            | Delis-Kaplan Executive Function System Tower Test Total Achievement Score                           | Executive function              | Flexibility                        |
| DKEFS                            | Delis-Kaplan Executive Function System Verbal Fluency: Category Fluency                             | Executive function              | Flexibility                        |
| DSM IV                           | Diagnostic and Statistical Manual of Mental Disorders-4th Edition Disorder Diagnosis, 3-point scale | Clinical diagnoses and symptoms | Overall                            |
| Dyscalculia                      | Dyscalculia diagnosis                                                                               | Clinical diagnoses and symptoms | Unable to be mapped to a subdomain |
| Dyslexia                         | Dyslexia diagnosis                                                                                  | Clinical diagnoses and symptoms | Unable to be mapped to a subdomain |
| ECBI                             | Eyberg Child Behavior Inventory                                                                     | Behavioral problems             | Externalizing problems             |
| EDI                              | Early Development Instrument Language and Cognitive Development                                     | General development             | No subdomains for this domain      |
| EDI                              | Early Development Instrument Total Score                                                            | General development             | Overall                            |
| EDI                              | Early Development Instrument Multiple Challenge Index                                               | General development             | No subdomains for this domain      |
| EDI                              | Early Development Instrument Early Developmental Vulnerability                                      | General development             | Overall                            |
| EDI                              | Early Development Instrument Physical Health and Well-Being                                         | General health and wellbeing    | No subdomains for this domain      |
| EDI                              | Early Development Instrument Communication Skills and General Knowledge                             | Language                        | Overall                            |
| EDI                              | Early Development Instrument Emotional Health and Maturity                                          | Social-cognition                | No subdomains for this domain      |
| EDI                              | Early Development Instrument Social Knowledge and Competence                                        | Social-cognition                | No subdomains for this domain      |
| Educational Attainment           | Educational Attainment                                                                              | Academics                       | Overall                            |
| Executive Function (unspecified) | Color-Word Inhibition                                                                               | Executive function              | Inhibition                         |
| Executive Function (unspecified) | Color-Word Inhibition Switching                                                                     | Executive function              | Inhibition                         |

|                                  |                                                                               |                                 |                                    |
|----------------------------------|-------------------------------------------------------------------------------|---------------------------------|------------------------------------|
| Executive Function (unspecified) | Number-letter Sequencing                                                      | Executive function              | Processing speed                   |
| Executive Function (unspecified) | 20 Questions                                                                  | Unable to be mapped to a domain | Unable to be mapped to a subdomain |
| Expressive Language              | Expressive language composite (Boston naming + D-KEFS)                        | Language                        | Expressive language                |
| FDS                              | Forward Digit Span Test                                                       | Executive function              | Memory                             |
| Fine motor                       | Fine motor composite (Beery Motor + grooved pegboard)                         | Motor function                  | Fine motor                         |
| G-TVPS                           | Gardner Test of Visual-Perceptual Skills Revised: Visual Memory Test          | Executive function              | Memory                             |
| GDS                              | Gesell Developmental Schedule Language                                        | Language                        | Overall                            |
| GDS                              | Gesell Developmental Schedule Response to Objects                             | Unable to be mapped to a domain | Unable to be mapped to a subdomain |
| GDS                              | Gesell Developmental Schedule Response to People                              | Unable to be mapped to a domain | Unable to be mapped to a subdomain |
| GDS                              | Gesell Developmental Schedule Movement                                        | Motor function                  | Overall                            |
| GMDS                             | Griffiths Mental Development Scale Performance                                | Adaptive behavior               | Problem solving                    |
| GMDS                             | Griffiths Mental Development Scale Personal/Social                            | Adaptive behavior               | Personal/social                    |
| GMDS                             | Griffiths Mental Development Scale Mental Age                                 | Cognition                       | Overall                            |
| GMDS                             | Griffiths Mental Development Scale General Development Quotient               | General development             | Overall                            |
| GMDS                             | Griffiths Mental Development Scale Hearing and Speech                         | Language                        | Overall                            |
| GMDS                             | Griffiths Mental Development Scale Eye/Hand                                   | Motor function                  | Fine motor                         |
| GMDS                             | Griffiths Mental Development Scale Motor                                      | Motor function                  | Gross motor                        |
| GMDS-II                          | Griffiths Mental Development Scale II General Development Quotient Deficiency | General development             | Overall                            |
| GMFCS                            | Gross Motor Function Classification System                                    | Clinical diagnoses and symptoms | Cerebral palsy                     |
| Go/no go                         | Go/No go Task                                                                 | Executive function              | Inhibition                         |
| GPT                              | Grooved Pegboard Test Dominant Hand                                           | Motor function                  | Fine motor                         |
| GPT                              | Grooved Pegboard Test Fine Motor                                              | Motor function                  | Fine motor                         |
| GPT                              | Grooved Pegboard Test Non-Dominant Hand                                       | Motor function                  | Fine motor                         |
| HAWIVA-III                       | Hannover-Wechsler Intelligence Scale, 3rd edition Full Scale IQ               | Cognition                       | Overall                            |
| HAWIVA-III                       | Hannover-Wechsler Intelligence Scale, 3rd Processing Speed                    | Executive function              | Processing speed                   |
| HAWIVA-III                       | Hannover-Wechsler Intelligence Scale, 3rd edition Verbal IQ                   | Language                        | Verbal IQ                          |
| HAWIVA-III                       | Hannover-Wechsler Intelligence Scale, 3rd edition Nonverbal IQ                | Nonverbal reasoning             | Overall                            |
| Hearing                          | Hearing Impairment                                                            | Clinical diagnoses and symptoms | Hearing                            |
| HK-WISC                          | Hong Kong-Wechsler Intelligence Scale for Children General Comprehension      | Language                        | Verbal IQ                          |
| HKLL                             | Hong Kong List Learning                                                       | Executive function              | Memory                             |
| IEP                              | Need for Individualized Education Plan                                        | Clinical diagnoses and symptoms | Developmental delay                |



|         |                                                                            |                                 |                               |
|---------|----------------------------------------------------------------------------|---------------------------------|-------------------------------|
| IEP     | Individualized Education Plan Speech/Language                              | Clinical diagnoses and symptoms | Developmental delay           |
| IEP     | Individualized Education Plan Emotion/Behavioral                           | Clinical diagnoses and symptoms | Developmental delay           |
| Iowa    | Iowa Overall Standardized Test                                             | Academics                       | Overall                       |
| ITSP    | Infant/toddler Sensory Profile Auditory Processing                         | Sensory                         | No subdomains for this domain |
| ITSP    | Infant/toddler Sensory Profile Low Threshold                               | Sensory                         | No subdomains for this domain |
| ITSP    | Infant/toddler Sensory Profile Oral Processing                             | Sensory                         | No subdomains for this domain |
| ITSP    | Infant/toddler Sensory Profile Low Registration                            | Sensory                         | No subdomains for this domain |
| ITSP    | Infant/toddler Sensory Profile Sensation Seeking                           | Sensory                         | No subdomains for this domain |
| ITSP    | Infant/toddler Sensory Profile Sensory Sensitivity                         | Sensory                         | No subdomains for this domain |
| ITSP    | Infant/toddler Sensory Profile Sensation Avoiding                          | Sensory                         | No subdomains for this domain |
| ITSP    | Infant/toddler Sensory Profile Tactile Processing                          | Sensory                         | No subdomains for this domain |
| ITSP    | Infant/toddler Sensory Profile Vestibular Processing                       | Sensory                         | No subdomains for this domain |
| ITSP    | Infant/toddler Sensory Profile Visual Processing                           | Sensory                         | No subdomains for this domain |
| J-ASQ-3 | Japanese Ages and Stages Questionnaire, Third edition Communication        | Language                        | Overall                       |
| J-ASQ-3 | Japanese Ages and Stages Questionnaire, Third edition Gross motor          | Motor function                  | Gross motor                   |
| J-ASQ-3 | Japanese Ages and Stages Questionnaire, Third edition Fine motor           | Motor function                  | Fine motor                    |
| J-ASQ-3 | Japanese Ages and Stages Questionnaire, Third edition Problem solving      | Adaptive behavior               | Problem solving               |
| J-ASQ-3 | Japanese Ages and Stages Questionnaire, Third edition Personal-social      | Adaptive behavior               | Personal/social               |
| K-ABC   | Kaufmann Assessment Battery for Children Location Memory                   | Executive function              | Memory                        |
| K-ABC   | Kaufmann Assessment Battery for Children Picture                           | Nonverbal reasoning             | No subdomains for this domain |
| K-ABC   | Kaufmann Assessment Battery for Children Triangle                          | Nonverbal reasoning             | No subdomains for this domain |
| K-ABC   | Kaufmann Assessment Battery for Children Visual Analogy                    | Nonverbal reasoning             | No subdomains for this domain |
| KET-KID | Kognitiver Entwicklungstest fur das Kindergartenalter Global Score         | Cognition                       | Overall                       |
| KET-KID | Kognitiver Entwicklungstest fur das Kindergartenalter Verbal Memory        | Executive function              | Memory                        |
| KET-KID | Kognitiver Entwicklungstest fur das Kindergartenalter Visual Memory        | Executive function              | Memory                        |
| KET-KID | Kognitiver Entwicklungstest fur das Kindergartenalter Articulation         | Language                        | Articulation                  |
| KET-KID | Kognitiver Entwicklungstest fur das Kindergartenalter Verbal Development   | Language                        | Overall                       |
| KET-KID | Kognitiver Entwicklungstest fur das Kindergartenalter Verbal Comprehension | Language                        | Receptive language            |

|             |                                                                                  |                                 |                                    |
|-------------|----------------------------------------------------------------------------------|---------------------------------|------------------------------------|
| KET-KID     | Kognitiver Entwicklungstest für das Kindergartenalter<br>Psychomotor Development | Motor function                  | Overall                            |
| KET-KID     | Kognitiver Entwicklungstest für das Kindergartenalter<br>Nonverbal Development   | Nonverbal reasoning             | No subdomains for this domain      |
| KET-KID     | Kognitiver Entwicklungstest für das Kindergartenalter<br>Visual Perception       | Nonverbal reasoning             | No subdomains for this domain      |
| KET-KID     | Kognitiver Entwicklungstest für das Kindergartenalter<br>Visuoconstruction       | Nonverbal reasoning             | No subdomains for this domain      |
| Key Stage 2 | Key Stage 2 English                                                              | Academics                       | Unable to be mapped to a subdomain |
| Key Stage 2 | Key Stage 2 Mathematics                                                          | Academics                       | Math                               |
| Key Stage 2 | Key Stage 2 Science                                                              | Academics                       | Unable to be mapped to a subdomain |
| Key Stage 2 | Key Stage 2 non-attainment                                                       | Academics                       | Unable to be mapped to a subdomain |
| Key Stage 3 | Key Stage 3 English                                                              | Academics                       | Unable to be mapped to a subdomain |
| Key Stage 3 | Key Stage 3 Mathematics                                                          | Academics                       | Math                               |
| Key Stage 3 | Key Stage 3 Science                                                              | Academics                       | Unable to be mapped to a subdomain |
| Key Stage 3 | Key Stage 3 non-attainment                                                       | Academics                       | Unable to be mapped to a subdomain |
| Key Stage 4 | Key Stage 4 total points                                                         | Academics                       | Unable to be mapped to a subdomain |
| Key Stage 4 | Key Stage 4 exam entries                                                         | Academics                       | Unable to be mapped to a subdomain |
| Key Stage 4 | Key Stage 4 English A*, A, b, or C grade                                         | Academics                       | Unable to be mapped to a subdomain |
| Key Stage 4 | Key Stage 4 mathematics A*, A, b, or C grade                                     | Academics                       | Math                               |
| Key Stage 4 | Key Stage 4 science 2 "good" passes (C grade or above)                           | Academics                       | Unable to be mapped to a subdomain |
| LD          | Learning Disability/Disorder Diagnosis                                           | Clinical diagnoses and symptoms | Developmental delay                |
| LD          | Learning Disability/Disorder Diagnosis - Reading                                 | Clinical diagnoses and symptoms | Developmental delay                |
| LD          | Learning Disability/Disorder Diagnosis - Writing                                 | Clinical diagnoses and symptoms | Developmental delay                |
| LD          | Learning Disability/Disorder Diagnosis - Math                                    | Clinical diagnoses and symptoms | Developmental delay                |
| M-ABC       | Movement Assessment Battery for Children Total Score                             | Motor function                  | Overall                            |
| M-ABC       | Movement Assessment Battery for Children Balance Skills                          | Motor function                  | Gross motor                        |
| M-ABC       | Movement Assessment Battery for Children Ball Skills                             | Motor function                  | Gross motor                        |
| M-ABC       | Movement Assessment Battery for Children Manual Dexterity                        | Motor function                  | Fine motor                         |
| M-ABC       | Movement Assessment Battery for Children Heel-to-toe walking task                | Motor function                  | Gross motor                        |
| M-ABC       | Movement Assessment Battery for Children Preferred hand peg placing              | Motor function                  | Fine motor                         |
| M-ABC       | Movement Assessment Battery for Children Nonpreferred hand peg placing           | Motor function                  | Fine motor                         |
| M-ABC       | Movement Assessment Battery for Children Bean bag throwing task                  | Motor function                  | Gross motor                        |

|                             |                                                                                                     |                                 |                                    |
|-----------------------------|-----------------------------------------------------------------------------------------------------|---------------------------------|------------------------------------|
| MAND                        | McCarren Assessment of Neuromuscular Development                                                    | Motor function                  | Overall                            |
| McArthur--Bates             | McArthur Bates Communicative Development Inventory                                                  | Language                        | Overall                            |
| Mental Disorders            | Mental Disorder Diagnosis                                                                           | Clinical diagnoses and symptoms | Overall                            |
| NAPLAN                      | New South Wales Department of Education National Assessment Program-Literacy and Numeracy: Numeracy | Academics                       | Math                               |
| NAPLAN                      | New South Wales Department of Education National Assessment Program-Literacy and Numeracy: Reading  | Academics                       | Reading                            |
| National Test               | National Standardized Test Score                                                                    | Academics                       | Overall                            |
| NEPSY-II                    | Developmental Neuropsychological Assessment Battery-2nd Edition Auditory Attention                  | Executive function              | Attention                          |
| NEPSY-II                    | Developmental Neuropsychological Assessment Battery-2nd Edition Delayed Memory for Faces            | Executive function              | Memory                             |
| NEPSY-II                    | Developmental Neuropsychological Assessment Battery-2nd Edition Fingertap Tapping Repetitions       | Executive function              | Inhibition                         |
| NEPSY-II                    | Developmental Neuropsychological Assessment Battery-2nd Edition Fingertap Tapping Sequences         | Executive function              | Inhibition                         |
| NEPSY-II                    | Developmental Neuropsychological Assessment Battery-2nd Edition Inhibition                          | Executive function              | Inhibition                         |
| NEPSY-II                    | Developmental Neuropsychological Assessment Battery-2nd Edition Memory for Faces                    | Executive function              | Memory                             |
| NEPSY-II                    | Developmental Neuropsychological Assessment Battery-2nd Edition Memory for Names                    | Executive function              | Memory                             |
| NEPSY-II                    | Developmental Neuropsychological Assessment Battery-2nd Edition Sentence Repetition                 | Executive function              | Memory                             |
| NEPSY-II                    | Developmental Neuropsychological Assessment Battery-2nd Edition Speeded Naming                      | Executive function              | Processing speed                   |
| NEPSY-II                    | Developmental Neuropsychological Assessment Battery-2nd Edition Statue                              | Executive function              | Inhibition                         |
| NEPSY-II                    | Developmental Neuropsychological Assessment Battery-2nd Edition Word Generation                     | Executive function              | Processing speed                   |
| NEPSY-II                    | Developmental Neuropsychological Assessment Battery-2nd Edition Comprehension of Instructions       | Language                        | Receptive language                 |
| NEPSY-II                    | Developmental Neuropsychological Assessment Battery-2nd Edition Design Copy                         | Nonverbal reasoning             | No subdomains for this domain      |
| NEPSY-II                    | Developmental Neuropsychological Assessment Battery-2nd Edition Affect Recognition                  | Social-cognition                | No subdomains for this domain      |
| NEPSY-II                    | Developmental Neuropsychological Assessment Battery-2nd Edition Theory of Mind                      | Social-cognition                | No subdomains for this domain      |
| Neuro                       | Neurological Diagnoses                                                                              | Clinical diagnoses and symptoms | Overall                            |
| Neurodevelopmental disorder | Language/behavioral/psychomotor disorder                                                            | Clinical diagnoses and symptoms | Unable to be mapped to a subdomain |
| OLSAT                       | Stanford/Otis-Lennon School Ability Test Mathematics                                                | Academics                       | Math                               |
| OLSAT                       | Stanford/Otis-Lennon School Ability Test Reading                                                    | Academics                       | Reading                            |
| OLSAT                       | Stanford/Otis-Lennon School Ability Test Spelling                                                   | Academics                       | Spelling                           |
| OLSAT                       | Stanford/Otis-Lennon School Ability Test Total Battery                                              | Academics                       | Overall                            |
| OLSAT                       | Stanford/Otis-Lennon School Ability Test Language                                                   | Language                        | Overall                            |

|                                |                                                            |                                 |                                    |
|--------------------------------|------------------------------------------------------------|---------------------------------|------------------------------------|
| OTB                            | Operant Test Battery Conditioned Position Response         | Executive function              | Unable to be mapped to a subdomain |
| OTB                            | Operant Test Battery Delayed Match to Sample               | Executive function              | Unable to be mapped to a subdomain |
| OTB                            | Operant Test Battery Incremental Repeated Acquisition      | Executive function              | Unable to be mapped to a subdomain |
| OTB                            | Operant Test Battery Progressive Ratio                     | Executive function              | Unable to be mapped to a subdomain |
| OTB                            | Operant Test Battery Temporal Response Differentiation     | Executive function              | Unable to be mapped to a subdomain |
| OWLS                           | Oral and Written Language Scales                           | Language                        | Unable to be mapped to a subdomain |
| Parent Questionnaire           | Parent Social-Emotional Questionnaire                      | Social-cognition                | No subdomains for this domain      |
| PDMS                           | Peabody Developmental Motor Scales                         | Motor function                  | Overall                            |
| Phoneme deletion               | Phoneme deletion task                                      | Language                        | Unable to be mapped to a subdomain |
| PPVT                           | Peabody Picture Vocabulary Test                            | Language                        | Receptive language                 |
| Processing Speed (unspecified) | Processing speed: Digit Symbol                             | Executive function              | Processing speed                   |
| Processing Speed (unspecified) | Processing Speed: Color Naming                             | Executive function              | Processing speed                   |
| Processing Speed (unspecified) | Processing Speed: Dominant Hand Speed                      | Executive function              | Processing speed                   |
| Processing Speed (unspecified) | Processing Speed: Letter Sequencing                        | Executive function              | Processing speed                   |
| Processing Speed (unspecified) | Processing Speed: Non-dominant Hand Speed                  | Executive function              | Processing speed                   |
| Processing Speed (unspecified) | Processing Speed: Number Sequencing                        | Executive function              | Processing speed                   |
| Processing Speed (unspecified) | Processing Speed: Verbal Fluency                           | Executive function              | Processing speed                   |
| PSLE                           | Primary School Leaving Examination                         | Academics                       | Overall                            |
| Psychiatric Diagnosis          | Psychiatric Diagnoses                                      | Clinical diagnoses and symptoms | Overall                            |
| Psychiatric Interview          | Psychiatric Interview                                      | Clinical diagnoses and symptoms | Overall                            |
| Psychologist                   | Education psychologist counseling                          | Clinical diagnoses and symptoms | Developmental delay                |
| PVF                            | Phonemic verbal fluency test                               | Executive function              | Processing speed                   |
| RAKIT                          | Revised Amsterdam Intelligence Test                        | Cognition                       | Overall                            |
| RCFT                           | Rey Complex Figure Test and Recognition Trial: Copy        | Executive function              | Memory                             |
| RDLS                           | Reynell Developmental Language Scales: Comprehension       | Language                        | Receptive language                 |
| RDLS                           | Reynell Developmental Language Scales: Expressive Language | Language                        | Expressive language                |
| Reading                        | Real-word reading test                                     | Academics                       | Reading                            |
| Reading                        | Non-real-word reading test                                 | Academics                       | Reading                            |
| Recognition Memory             | Recognition memory: Color Familiarity                      | Executive function              | Memory                             |

|                                  |                                                                                     |                                 |                                    |
|----------------------------------|-------------------------------------------------------------------------------------|---------------------------------|------------------------------------|
| Recognition Memory               | Recognition Memory: Color Recollection                                              | Executive function              | Memory                             |
| Recognition Memory               | Recognition Memory: Spatial Familiarity                                             | Executive function              | Memory                             |
| Recognition Memory               | Recognition Memory: Spatial Recollection                                            | Executive function              | Memory                             |
| RSPM                             | Raven's Standard Progressive Matrices: IQ                                           | Nonverbal reasoning             | Overall                            |
| SAT Math                         | Vermont School SAT Math                                                             | Academics                       | Math                               |
| SAT Reading                      | Vermont School SAT Reading                                                          | Academics                       | Reading                            |
| SB-V                             | Stanford-Binet V FSIQ                                                               | Cognition                       | Overall                            |
| SB-V                             | Stanford-Binet V VIQ                                                                | Language                        | Verbal IQ                          |
| SB-V                             | Stanford-Binet V Fluid Reasoning                                                    | Unable to be mapped to a domain | Unable to be mapped to a subdomain |
| SB-V                             | Stanford-Binet V Knowledge                                                          | Unable to be mapped to a domain | Unable to be mapped to a subdomain |
| SB-V                             | Stanford-Binet V Quantitative Reasoning                                             | Unable to be mapped to a domain | Unable to be mapped to a subdomain |
| SB-V                             | Stanford-Binet V Visual-spatial Processing                                          | Unable to be mapped to a domain | Unable to be mapped to a subdomain |
| SB-V                             | Stanford-Binet V Working Memory                                                     | Executive function              | Unable to be mapped to a subdomain |
| SB-V                             | Stanford-Binet V Nonverbal IQ                                                       | Nonverbal reasoning             | No subdomains for this domain      |
| School                           | School Performance or Grades                                                        | Academics                       | Overall                            |
| SDMT                             | Symbol Digit Modality Test: Oral                                                    | Executive function              | Processing speed                   |
| SDMT                             | Symbol Digit Modality Test: Written                                                 | Executive function              | Processing speed                   |
| SDQ                              | Strengths and Difficulties Questionnaire                                            | Behavioral problems             | Overall                            |
| Skuse sociocognitive dysfunction | Skuse sociocognitive dysfunction score                                              | Behavioral problems             | Social problems                    |
| Social-Emotional                 | Social Emotional Scale                                                              | Social-cognition                |                                    |
| SON-R                            | Hogrefe/Snijders-Oomen Non-Verbal Intelligence Test-Revised IQ                      | Nonverbal reasoning             | Overall                            |
| Spelling (unspecified)           | Spelling test                                                                       | Academics                       | Spelling                           |
| SVF                              | Semantic Verbal Fluency Test                                                        | Executive function              | Processing speed                   |
| TCS                              | Test of Cognitive Skills Total Cognitive                                            | Cognition                       | Overall                            |
| TCS                              | Test of Cognitive Skills Memory                                                     | Executive function              | Memory                             |
| TEA-Ch                           | Test of Everyday Attention for Children Sky search task                             | Executive function              | Attention                          |
| TEA-Ch                           | Test of Everyday Attention for Children Opposite worlds task                        | Executive function              | Attention                          |
| TEA-Ch NL                        | Test of Everyday Attention for Children, Dutch Version Response Inhibition          | Executive function              | Inhibition                         |
| TEA-Ch NL                        | Test of Everyday Attention for Children, Dutch Version Sustained Auditory Attention | Executive function              | Attention                          |
| TEA-Ch NL                        | Test of Everyday Attention for Children, Dutch Version Visual Attention             | Executive function              | Attention                          |
| Teacher                          | Teacher Rating                                                                      | Academics                       | Overall                            |
| Test                             | Standardized Test Score Non-Attainment                                              | Academics                       | Overall                            |

|                                           |                                                                               |                                 |                                    |
|-------------------------------------------|-------------------------------------------------------------------------------|---------------------------------|------------------------------------|
| TOWRE                                     | Test of Word Reading Efficiency word-reading test                             | Academics                       | Reading                            |
| TOWRE                                     | Test of Word Reading Efficiency non-word-reading test                         | Academics                       | Reading                            |
| Treatment for neurodevelopmental disorder | Intervention for neurodevelopmental disorder                                  | Clinical diagnoses and symptoms | Unable to be mapped to a subdomain |
| VABS-I                                    | Vineland Adaptive Behavior Scales, 1st edition Deficit in subscale            | Adaptive behavior               | Overall                            |
| VABS-I                                    | Vineland Adaptive Behavior Scales, 1st edition Daily Living Skills            | Adaptive behavior               | Daily living skills                |
| VABS-I                                    | Vineland Adaptive Behavior Scales, 1st edition Socialization                  | Adaptive behavior               | Social                             |
| VABS-II                                   | Vineland Adaptive Behavior Scales, 2nd edition Composite                      | Adaptive behavior               | Overall                            |
| VABS-II                                   | Vineland Adaptive Behavior Scales, 2nd edition Daily Living                   | Adaptive behavior               | Daily living skills                |
| VABS-II                                   | Vineland Adaptive Behavior Scales, 2nd edition Socialization                  | Adaptive behavior               | Social                             |
| VABS-II                                   | Vineland Adaptive Behavior Scales, 2nd edition Total Sum                      | Adaptive behavior               | Overall                            |
| VABS-II                                   | Vineland Adaptive Behavior Scales, 2nd edition Communication Standard         | Language                        | Overall                            |
| VABS-II                                   | Vineland Adaptive Behavior Scales, 2nd edition Motor Skills                   | Motor function                  | Overall                            |
| VPAA                                      | Very Poor Academic Performance Reading                                        | Academics                       | Reading                            |
| VPAA                                      | Very Poor Academic Performance Math                                           | Academics                       | Math                               |
| VPAA                                      | Very Poor Academic Performance Overall                                        | Academics                       | Overall                            |
| WAIS-III VIQ                              | Wechsler Adult Intelligence Scale 3rd edition Verbal IQ                       | Language                        | Overall                            |
| WAIS-IV                                   | Wechsler Adult Intelligence Scale Version IV Full Scale Intelligence Quotient | Cognition                       | Overall                            |
| WAIS-IV                                   | Wechsler Adult Intelligence Scale Version IV Verbal Comprehension             | Language                        | Verbal IQ                          |
| WAIS-IV                                   | Wechsler Adult Intelligence Scale Version IV Perceptual Reasoning             | Non-verbal reasoning            | No subdomains for this domain      |
| WAIS-IV                                   | Wechsler Adult Intelligence Scale Version IV Working Memory                   | Executive function              | Memory                             |
| WAIS-IV                                   | Wechsler Adult Intelligence Scale Version IV Processing Speed                 | Executive function              | Processing speed                   |
| Wallin                                    | Wallin B pegboard from the Merrill-Palmer Scale of Mental Test                | Motor function                  | Fine motor                         |
| WAMSE                                     | Western Australian Literacy and Numeracy Standardized Test Numeracy           | Academics                       | Math                               |
| WAMSE                                     | Western Australian Literacy and Numeracy Standardized Test Reading            | Academics                       | Reading                            |
| WAMSE                                     | Western Australian Literacy and Numeracy Standardized Test Spelling           | Academics                       | Spelling                           |
| WAMSE                                     | Western Australian Literacy and Numeracy Standardized Test Writing            | Academics                       | Writing                            |
| WASI                                      | Wechsler Abbreviated Scale of Intelligence Full Scale IQ                      | Cognition                       | Overall                            |
| WASI                                      | Wechsler Abbreviated Scale of Intelligence Similarities                       | Language                        | Verbal IQ                          |
| WASI                                      | Wechsler Abbreviated Scale of Intelligence Verbal IQ                          | Language                        | Verbal IQ                          |
| WASI                                      | Wechsler Abbreviated Scale of Intelligence Vocabulary                         | Language                        | Verbal IQ                          |

|             |                                                                                        |                                 |                                    |
|-------------|----------------------------------------------------------------------------------------|---------------------------------|------------------------------------|
| WASI        | Wechsler Abbreviated Scale of Intelligence Matrix Vocab                                | Unable to be mapped to a domain | Unable to be mapped to a subdomain |
| WASI        | Wechsler Abbreviated Scale of Intelligence Block Design                                | Nonverbal reasoning             | No subdomains for this domain      |
| WASI        | Wechsler Abbreviated Scale of Intelligence Matrix Reasoning                            | Nonverbal reasoning             | No subdomains for this domain      |
| WASI        | Wechsler Abbreviated Scale of Intelligence Performance IQ                              | Nonverbal reasoning             | Overall                            |
| WCST        | Wisconsin Card Sort Test: Perseverative Errors                                         | Executive function              | Inhibition                         |
| WCST        | Wisconsin Card Sort Test: Perseverative Responses                                      | Executive function              | Inhibition                         |
| WeeFIM      | WeeFIM System for Functional Independence                                              | Adaptive behavior               | Daily living skills                |
| WIAT-II     | Wechsler Individual Achievement Test-2nd Edition Numerical Composite                   | Academics                       | Math                               |
| WIAT-II     | Wechsler Individual Achievement Test-2nd Edition Spelling                              | Academics                       | Spelling                           |
| WIAT-II     | Wechsler Individual Achievement Test-2nd Edition Word Reading                          | Academics                       | Reading                            |
| WISC-III    | Wechsler Intelligence Scale for Children-3rd edition Full Scale Intelligence Quotient  | Cognition                       | Overall                            |
| WISC-III    | Wechsler Intelligence Scale for Children-3rd edition Verbal Intelligence Quotient      | Language                        | Verbal IQ                          |
| WISC-III    | Wechsler Intelligence Scale for Children-3rd edition Performance Intelligence Quotient | Nonverbal reasoning             | Overall                            |
| WISC-III-NL | Wechsler Intelligence Scale for Children-3rd edition, Dutch version FSIQ               | Cognition                       | Overall                            |
| WISC-III-NL | Wechsler Intelligence Scale for Children-3rd edition, Dutch version Verbal IQ          | Language                        | Verbal IQ                          |
| WISC-III-NL | Wechsler Intelligence Scale for Children-3rd edition, Dutch version Performance IQ     | Nonverbal reasoning             | Overall                            |
| WISC-IV     | Wechsler Intelligence Scale for Children-4th edition IQ                                | Cognition                       | Overall                            |
| WISC-IV     | Wechsler Intelligence Scale for Children-4th edition Coding                            | Executive function              | Processing speed                   |
| WISC-IV     | Wechsler Intelligence Scale for Children-4th edition Digit Span                        | Executive function              | Memory                             |
| WJ          | Woodcock-Johnson Visual Matching Test                                                  | Executive function              | Processing speed                   |
| WJ-III      | Woodcock-Johnson Achievement Battery III Mathematics                                   | Academics                       | Math                               |
| WJ-III      | Woodcock-Johnson Achievement Battery III Reading                                       | Academics                       | Reading                            |
| WJ-III ACA  | Woodcock Johnson III Tests of Academic Achievement Broad Reading                       | Academics                       | Reading                            |
| WJ-III COG  | Woodcock Johnson III Tests of Cognitive Abilities General Intellectual Ability/IQ      | Cognition                       | Overall                            |
| WJ-III COG  | Woodcock Johnson III Tests of Cognitive Abilities Broad Attention                      | Executive function              | Attention                          |
| WJ-III COG  | Woodcock Johnson III Tests of Cognitive Abilities Processing Speed                     | Executive function              | Processing speed                   |
| WJ-III COG  | Woodcock Johnson III Tests of Cognitive Abilities Working Memory                       | Executive function              | Memory                             |
| WMS--CR     | Wechsler Memory Scale-Chinese Revision Digit Span                                      | Executive function              | Memory                             |
| WMS--CR     | Wechsler Memory Scale-Chinese Revision Image Recalling                                 | Executive function              | Memory                             |
| WMS--CR     | Wechsler Memory Scale-Chinese Revision Figure Recognition                              | Executive function              | Memory                             |

|               |                                                                                                                  |                                 |                                    |
|---------------|------------------------------------------------------------------------------------------------------------------|---------------------------------|------------------------------------|
| WMS--CR       | Wechsler Memory Scale-Chinese Revision Visual Reproduction                                                       | Executive function              | Memory                             |
| WMS--CR       | Wechsler Memory Scale-Chinese Revision Verbal-Paired Associates                                                  | Executive function              | Memory                             |
| WMS--CR       | Wechsler Memory Scale-Chinese Revision Comprehension Memory                                                      | Executive function              | Memory                             |
| WMS--CR       | Wechsler Memory Scale-Chinese Revision Forward Counting                                                          | Executive function              | Memory                             |
| WMS--CR       | Wechsler Memory Scale-Chinese Revision Accumulation                                                              | Executive function              | Memory                             |
| WMS--CR       | Wechsler Memory Scale-Chinese Revision Backward Counting                                                         | Executive function              | Memory                             |
| WOLD          | Wechsler Objective Language Dimensions comprehension task                                                        | Language                        | Receptive language                 |
| WOLD          | Wechsler Objective Language Dimensions verbal expression task                                                    | Language                        | Expressive language                |
| WORD          | Wechsler Objective Reading Dimensions Basic reading test                                                         | Academics                       | Reading                            |
| WPPSI-III     | Wechsler Preschool and Primary Scale of Intelligence-3rd Edition Arithmetic                                      | Academics                       | Math                               |
| WPPSI-III     | Wechsler Preschool and Primary Scale of Intelligence-3rd Edition FSIQ                                            | Cognition                       | Overall                            |
| WPPSI-III     | Wechsler Preschool and Primary Scale of Intelligence-3rd Edition Animal House                                    | Executive function              | Processing speed                   |
| WPPSI-III     | Wechsler Preschool and Primary Scale of Intelligence-3rd Edition Processing Speed                                | Executive function              | Processing speed                   |
| WPPSI-III     | Wechsler Preschool and Primary Scale of Intelligence-3rd Edition Comprehension                                   | Language                        | Verbal IQ                          |
| WPPSI-III     | Wechsler Preschool and Primary Scale of Intelligence-3rd Edition Information                                     | Language                        | Verbal IQ                          |
| WPPSI-III     | Wechsler Preschool and Primary Scale of Intelligence-3rd Edition Similarities                                    | Language                        | Verbal IQ                          |
| WPPSI-III     | Wechsler Preschool and Primary Scale of Intelligence-3rd Edition VIQ                                             | Language                        | Overall                            |
| WPPSI-III     | Wechsler Preschool and Primary Scale of Intelligence-3rd Edition Vocabulary                                      | Language                        | Unable to be mapped to a subdomain |
| WPPSI-III     | Wechsler Preschool and Primary Scale of Intelligence-3rd Edition Block Design                                    | Nonverbal reasoning             | No subdomains for this domain      |
| WPPSI-III     | Wechsler Preschool and Primary Scale of Intelligence-3rd Edition Geometric Design                                | Nonverbal reasoning             | No subdomains for this domain      |
| WPPSI-III     | Wechsler Preschool and Primary Scale of Intelligence-3rd Edition Mazes                                           | Nonverbal reasoning             | No subdomains for this domain      |
| WPPSI-III     | Wechsler Preschool and Primary Scale of Intelligence-3rd Edition PIQ                                             | Nonverbal reasoning             | Overall                            |
| WPPSI-III     | Wechsler Preschool and Primary Scale of Intelligence-3rd Edition Picture Completion                              | Nonverbal reasoning             | No subdomains for this domain      |
| WPPSI-IV (CR) | Wechsler Preschool and Primary Scale of Intelligence, fourth edition, Chinese version FSIQ                       | Cognition                       | Overall                            |
| WPPSI-IV (CR) | Wechsler Preschool and Primary Scale of Intelligence, fourth edition, Chinese version Verbal Comprehension Index | Language                        | Verbal IQ                          |
| WPPSI-IV (CR) | Wechsler Preschool and Primary Scale of Intelligence, fourth edition, Chinese version Visual-Spatial Index       | Unable to be mapped to a domain | Unable to be mapped to a subdomain |
| WPPSI-IV (CR) | Wechsler Preschool and Primary Scale of Intelligence, fourth edition, Chinese version Fluid Reasoning Index      | Unable to be mapped to a domain | Unable to be mapped to a subdomain |



|               |                                                                                                              |                    |                  |
|---------------|--------------------------------------------------------------------------------------------------------------|--------------------|------------------|
| WPPSI-IV (CR) | Wechsler Preschool and Primary Scale of Intelligence, fourth edition, Chinese version Working Memory Index   | Executive function | Memory           |
| WPPSI-IV (CR) | Wechsler Preschool and Primary Scale of Intelligence, fourth edition, Chinese version Processing Speed Index | Executive function | Processing speed |
| WPPSI-R       | Wechsler Preschool and Primary Scale of Intelligence-Revised IQ                                              | Cognition          | Overall          |
| WRAML-2       | Wide Range Assessment of Memory and Learning, second edition Attention/concentration Index                   | Executive function | Attention        |
| WRAML-2       | Wide Range Assessment of Memory and Learning, second edition Delayed Verbal Recall Composite                 | Executive function | Memory           |
| WRAML-2       | Wide Range Assessment of Memory and Learning, second edition Design Memory                                   | Executive function | Memory           |
| WRAML-2       | Wide Range Assessment of Memory and Learning, second edition Design Recognition                              | Executive function | Memory           |
| WRAML-2       | Wide Range Assessment of Memory and Learning, second edition Story Memory Delay Recall                       | Executive function | Memory           |
| WRAML-2       | Wide Range Assessment of Memory and Learning, second edition Story Memory Recognition                        | Executive function | Memory           |
| WRAML-2       | Wide Range Assessment of Memory and Learning, second edition Verbal Learning Delay Recall                    | Executive function | Memory           |
| WRAML-2       | Wide Range Assessment of Memory and Learning, second edition Verbal Learning Recognition                     | Executive function | Memory           |
| WRAML-2       | Wide Range Assessment of Memory and Learning, second edition Verbal Memory Index                             | Executive function | Memory           |
| WRAML-2       | Wide Range Assessment of Memory and Learning, second edition Verbal Recognition Composite                    | Executive function | Memory           |

**eTable 3.** All Neurodevelopmental Domain and Subdomains and the Classification of Outcomes into These Domains and Subdomains

| Domain    | Overall Measure or Subdomain | Test                   | Description of Score                                                     |
|-----------|------------------------------|------------------------|--------------------------------------------------------------------------|
| Academics | Overall                      | BSID-III               | Bayley Scales of Infant Development-3rd edition Functional Pre-Academics |
| Academics | Overall                      | Educational Attainment | Educational Attainment                                                   |
| Academics | Overall                      | Iowa                   | Iowa Overall Standardized Test                                           |
| Academics | Overall                      | National Test          | National Standardized Test Score                                         |
| Academics | Overall                      | OLSAT                  | Stanford/Otis-Lennon School Ability Test Total Battery                   |
| Academics | Overall                      | PSLE                   | Primary School Leaving Examination                                       |
| Academics | Overall                      | School                 | School Performance or Grades                                             |
| Academics | Overall                      | Teacher                | Teacher Rating                                                           |
| Academics | Overall                      | Test                   | Standardized Test Score Non-Attainment                                   |
| Academics | Overall                      | VPAA                   | Very Poor Academic Performance Overall                                   |
| Academics | Math                         | CAT                    | California Achievement Test Math                                         |
| Academics | Math                         | CLDQ                   | Colorado Learning Difficulties Questionnaire Math Scale                  |
| Academics | Math                         | Key Stage 2            | Key Stage 2 Mathematics                                                  |

|           |                                    |                        |                                                                                                     |
|-----------|------------------------------------|------------------------|-----------------------------------------------------------------------------------------------------|
| Academics | Math                               | Key Stage 3            | Key Stage 3 Mathematics                                                                             |
| Academics | Math                               | Key Stage 4            | Key Stage 4 mathematics A*, A, b, or C grade                                                        |
| Academics | Math                               | NAPLAN                 | New South Wales Department of Education National Assessment Program-Literacy and Numeracy: Numeracy |
| Academics | Math                               | OLSAT                  | Stanford/Otis-Lennon School Ability Test Mathematics                                                |
| Academics | Math                               | SAT Math               | Vermont School SAT Math                                                                             |
| Academics | Math                               | VPAA                   | Very Poor Academic Performance Math                                                                 |
| Academics | Math                               | WAMSE                  | Western Australian Literacy and Numeracy Standardized Test Numeracy                                 |
| Academics | Math                               | WIAT-II                | Wechsler Individual Achievement Test-2nd Edition Numerical Composite                                |
| Academics | Math                               | WJ-III                 | Woodcock-Johnson Achievement Battery III Mathematics                                                |
| Academics | Math                               | WPPSI-III              | Wechsler Preschool and Primary Scale of Intelligence-3rd Edition Arithmetic                         |
| Academics | Reading                            | CAT                    | California Achievement Test Phonics                                                                 |
| Academics | Reading                            | CLDQ                   | Colorado Learning Difficulties Questionnaire Reading Scale                                          |
| Academics | Reading                            | NAPLAN                 | New South Wales Department of Education National Assessment Program-Literacy and Numeracy: Reading  |
| Academics | Reading                            | OLSAT                  | Stanford/Otis-Lennon School Ability Test Reading                                                    |
| Academics | Reading                            | Reading                | Real-word reading test                                                                              |
| Academics | Reading                            | Reading                | Non-real-word reading test                                                                          |
| Academics | Reading                            | SAT Reading            | Vermont School SAT Reading                                                                          |
| Academics | Reading                            | TOWRE                  | Test of Word Reading Efficiency word-reading test                                                   |
| Academics | Reading                            | TOWRE                  | Test of Word Reading Efficiency non-word-reading test                                               |
| Academics | Reading                            | VPAA                   | Very Poor Academic Performance Reading                                                              |
| Academics | Reading                            | WAMSE                  | Western Australian Literacy and Numeracy Standardized Test Reading                                  |
| Academics | Reading                            | WIAT-II                | Wechsler Individual Achievement Test-2nd Edition Word Reading                                       |
| Academics | Reading                            | WJ-III                 | Woodcock-Johnson Achievement Battery III Reading                                                    |
| Academics | Reading                            | WJ-III ACA             | Woodcock Johnson III Tests of Academic Achievement Broad Reading                                    |
| Academics | Reading                            | WORD                   | Wechsler Objective Reading Dimensions Basic reading test                                            |
| Academics | Spelling                           | CAT                    | California Achievement Test Spelling                                                                |
| Academics | Spelling                           | OLSAT                  | Stanford/Otis-Lennon School Ability Test Spelling                                                   |
| Academics | Spelling                           | Spelling (unspecified) | Spelling test                                                                                       |
| Academics | Spelling                           | WAMSE                  | Western Australian Literacy and Numeracy Standardized Test Spelling                                 |
| Academics | Spelling                           | WIAT-II                | Wechsler Individual Achievement Test-2nd Edition Spelling                                           |
| Academics | Unable to be mapped to a subdomain | Key Stage 2            | Key Stage 2 English                                                                                 |
| Academics | Unable to be mapped to a subdomain | Key Stage 2            | Key Stage 2 Science                                                                                 |
| Academics | Unable to be mapped to a subdomain | Key Stage 2            | Key Stage 2 non-attainment                                                                          |

|                   |                                          |             |                                                                                  |
|-------------------|------------------------------------------|-------------|----------------------------------------------------------------------------------|
| Academics         | Unable to be mapped to a subdomain       | Key Stage 3 | Key Stage 3 English                                                              |
| Academics         | Unable to be mapped to a subdomain       | Key Stage 3 | Key Stage 3 Science                                                              |
| Academics         | Unable to be mapped to a subdomain       | Key Stage 3 | Key Stage 3 non-attainment                                                       |
| Academics         | Unable to be mapped to a subdomain       | Key Stage 4 | Key Stage 4 total points                                                         |
| Academics         | Unable to be mapped to a subdomain       | Key Stage 4 | Key Stage 4 exam entries                                                         |
| Academics         | Unable to be mapped to a subdomain       | Key Stage 4 | Key Stage 4 English A*, A, b, or C grade                                         |
| Academics         | Unable to be mapped to a subdomain       | Key Stage 4 | Key Stage 4 science 2 “good” passes (C grade or above)                           |
| Academics         | Writing                                  | CAT         | California Achievement Test Written Language                                     |
| Academics         | Writing                                  | WAMSE       | Western Australian Literacy and Numeracy Standardized Test Writing               |
| Adaptive behavior | Overall                                  | ABAS-II     | Adaptive Behavior Assessment System-2nd edition Conceptual Composite Score       |
| Adaptive behavior | Overall                                  | ABAS-II     | Adaptive Behavior Assessment System-2nd edition General Adaptive Composite Score |
| Adaptive behavior | Overall                                  | ABAS-II     | Adaptive Behavior Assessment System-2nd edition Practical Composite Score        |
| Adaptive behavior | Overall                                  | ABS         | Adaptive Behavior Scale Conceptual                                               |
| Adaptive behavior | Overall                                  | ABS         | Adaptive Behavior Scale General Adaptive Composite                               |
| Adaptive behavior | Overall                                  | ABS         | Adaptive Behavior Scale Practical                                                |
| Adaptive behavior | Overall                                  | BSID-III    | Bayley Scales of Infant Development-3rd edition Adaptive Behavior                |
| Adaptive behavior | Overall                                  | VABS-I      | Vineland Adaptive Behavior Scales, 1st edition Deficit in subscale               |
| Adaptive behavior | Overall                                  | VABS-II     | Vineland Adaptive Behavior Scales, 2nd edition Composite                         |
| Adaptive behavior | Overall                                  | VABS-II     | Vineland Adaptive Behavior Scales, 2nd edition Total Sum                         |
| Adaptive behavior | Community participation and independence | BSID-III    | Bayley Scales of Infant Development-3rd edition Community Use                    |
| Adaptive behavior | Community participation and independence | BSID-III    | Bayley Scales of Infant Development-3rd edition Health and Safety                |
| Adaptive behavior | Community participation and independence | BSID-III    | Bayley Scales of Infant Development-3rd edition Leisure                          |
| Adaptive behavior | Daily living skills                      | BSID-III    | Bayley Scales of Infant Development-3rd edition Home Living                      |
| Adaptive behavior | Daily living skills                      | BSID-III    | Bayley Scales of Infant Development-3rd edition Self-Care                        |
| Adaptive behavior | Daily living skills                      | BSID-III    | Bayley Scales of Infant Development-3rd edition Self-Direction                   |
| Adaptive behavior | Daily living skills                      | VABS-I      | Vineland Adaptive Behavior Scales, 1st edition Daily Living Skills               |
| Adaptive behavior | Daily living skills                      | VABS-II     | Vineland Adaptive Behavior Scales, 2nd edition Daily Living                      |
| Adaptive behavior | Daily living skills                      | WeeFIM      | WeeFIM System for Functional Independence                                        |

|                                 |                                    |                                  |                                                                                                     |
|---------------------------------|------------------------------------|----------------------------------|-----------------------------------------------------------------------------------------------------|
| Adaptive behavior               | Personal/social                    | ASQ                              | Ages & Stages Questionnaire Personal/Social                                                         |
| Adaptive behavior               | Personal/social                    | GMDS                             | Griffiths Mental Development Scale Personal/Social                                                  |
| Adaptive behavior               | Personal/social                    | J-ASQ-3                          | Japanese Ages and Stages Questionnaire, Third edition Personal-social                               |
| Adaptive behavior               | Problem solving                    | ASQ                              | Ages & Stages Questionnaire Problem Solving                                                         |
| Adaptive behavior               | Problem solving                    | GMDS                             | Griffiths Mental Development Scale Performance                                                      |
| Adaptive behavior               | Problem solving                    | J-ASQ-3                          | Japanese Ages and Stages Questionnaire, Third edition Problem solving                               |
| Adaptive behavior               | Social                             | ABAS-II                          | Adaptive Behavior Assessment System-2nd edition Social Composite Score                              |
| Adaptive behavior               | Social                             | ABS                              | Adaptive Behavior Scale Social                                                                      |
| Adaptive behavior               | Social                             | VABS-I                           | Vineland Adaptive Behavior Scales, 1st edition Socialization                                        |
| Adaptive behavior               | Social                             | VABS-II                          | Vineland Adaptive Behavior Scales, 2nd edition Socialization                                        |
| Behavioral problems             | Overall                            | CBCL                             | Child Behavior Checklist Total Problems                                                             |
| Behavioral problems             | Overall                            | CHQ50                            | The Child Health Questionnaire 50 General Behavior                                                  |
| Behavioral problems             | Overall                            | SDQ                              | Strengths and Difficulties Questionnaire                                                            |
| Behavioral problems             | Externalizing problems             | CBCL                             | Child Behavior Checklist Aggressive Behavior                                                        |
| Behavioral problems             | Externalizing problems             | CBCL                             | Child Behavior Checklist Externalizing Problems                                                     |
| Behavioral problems             | Externalizing problems             | CTRS-R:S                         | Conner's' teacher Rating Scale-Revised: Short Form                                                  |
| Behavioral problems             | Externalizing problems             | ECBI                             | Eyberg Child Behavior Inventory                                                                     |
| Behavioral problems             | Internalizing problems             | CBCL                             | Child Behavior Checklist Anxious/Depressed                                                          |
| Behavioral problems             | Internalizing problems             | CBCL                             | Child Behavior Checklist Emotionally Reactive                                                       |
| Behavioral problems             | Internalizing problems             | CBCL                             | Child Behavior Checklist Internalizing Problems                                                     |
| Behavioral problems             | Internalizing problems             | CBCL                             | Child Behavior Checklist Somatic Complaints                                                         |
| Behavioral problems             | Internalizing problems             | CBCL                             | Child Behavior Checklist Withdrawn                                                                  |
| Behavioral problems             | Internalizing problems             | CDI                              | Children's Depression Inventory                                                                     |
| Behavioral problems             | Social problems                    | CBCL                             | Child Behavior Checklist Social Problems                                                            |
| Behavioral problems             | Social problems                    | Skuse sociocognitive dysfunction | Skuse sociocognitive dysfunction score                                                              |
| Behavioral problems             | Thought                            | CBCL                             | Child Behavior Checklist Thought Problems                                                           |
| Behavioral problems             | Unable to be mapped to a subdomain | CBCL                             | Child Behavior Checklist Delinquent Behavior                                                        |
| Clinical diagnoses and symptoms | Overall                            | DSM IV                           | Diagnostic and Statistical Manual of Mental Disorders-4th Edition Disorder Diagnosis, 3-point scale |
| Clinical diagnoses and symptoms | Overall                            | Mental Disorders                 | Mental Disorder Diagnosis                                                                           |
| Clinical diagnoses and symptoms | Overall                            | Neuro                            | Neurological Diagnoses                                                                              |
| Clinical diagnoses and symptoms | Overall                            | Psychiatric Diagnosis            | Psychiatric Diagnoses                                                                               |

|                                 |                                    |                                           |                                                                                     |
|---------------------------------|------------------------------------|-------------------------------------------|-------------------------------------------------------------------------------------|
| Clinical diagnoses and symptoms | Overall                            | Psychiatric Interview                     | Psychiatric Interview                                                               |
| Clinical diagnoses and symptoms | ADHD                               | ADHD                                      | Attention Deficit Hyperactivity Disorder Diagnosis                                  |
| Clinical diagnoses and symptoms | ADHD                               | ADHD                                      | ADHD medication use                                                                 |
| Clinical diagnoses and symptoms | ADHD                               | CBCL                                      | Child Behavior Checklist ADHD Problems                                              |
| Clinical diagnoses and symptoms | ADHD                               | CBCL                                      | Child Behavior Checklist Attention Problems                                         |
| Clinical diagnoses and symptoms | ASD                                | A-TAC                                     | The Autism - Tics, ADHD and other Comorbidities Inventory: Autism Spectrum Disorder |
| Clinical diagnoses and symptoms | ASD                                | ASD                                       | Autism Spectrum Disorder Diagnoses                                                  |
| Clinical diagnoses and symptoms | ASD                                | CBCL                                      | Child Behavior Checklist Pervasive Developmental Problem Scale                      |
| Clinical diagnoses and symptoms | Cerebral palsy                     | Cerebral Palsy                            | Cerebral Palsy Diagnosis                                                            |
| Clinical diagnoses and symptoms | Cerebral palsy                     | GMFCS                                     | Gross Motor Function Classification System                                          |
| Clinical diagnoses and symptoms | Developmental delay                | A-TAC                                     | The Autism - Tics, ADHD and other Comorbidities Inventory: Learning Disabilities    |
| Clinical diagnoses and symptoms | Developmental delay                | Developmental Delay                       | Developmental Delay (overall, language, motor, social, and/or behavioral) diagnosis |
| Clinical diagnoses and symptoms | Developmental delay                | IEP                                       | Need for Individualized Education Plan                                              |
| Clinical diagnoses and symptoms | Developmental delay                | IEP                                       | Individualized Education Plan Speech/Language                                       |
| Clinical diagnoses and symptoms | Developmental delay                | IEP                                       | Individualized Education Plan Emotion/Behavioral                                    |
| Clinical diagnoses and symptoms | Developmental delay                | LD                                        | Learning Disability/Disorder Diagnosis                                              |
| Clinical diagnoses and symptoms | Developmental delay                | LD                                        | Learning Disability/Disorder Diagnosis - Reading                                    |
| Clinical diagnoses and symptoms | Developmental delay                | LD                                        | Learning Disability/Disorder Diagnosis - Writing                                    |
| Clinical diagnoses and symptoms | Developmental delay                | LD                                        | Learning Disability/Disorder Diagnosis - Math                                       |
| Clinical diagnoses and symptoms | Developmental delay                | Psychologist                              | Education psychologist counseling                                                   |
| Clinical diagnoses and symptoms | Hearing                            | Hearing                                   | Hearing Impairment                                                                  |
| Clinical diagnoses and symptoms | PTSD                               | CPRI                                      | Child Post-Traumatic Stress Disorder Reaction Index                                 |
| Clinical diagnoses and symptoms | Sleep                              | CBCL                                      | Child Behavior Checklist Sleep Problems                                             |
| Clinical diagnoses and symptoms | Unable to be mapped to a subdomain | Dyscalculia                               | Dyscalculia diagnosis                                                               |
| Clinical diagnoses and symptoms | Unable to be mapped to a subdomain | Dyslexia                                  | Dyslexia diagnosis                                                                  |
| Clinical diagnoses and symptoms | Unable to be mapped to a subdomain | Neurodevelopmental disorder               | Language/behavioral/psychomotor disorder                                            |
| Clinical diagnoses and symptoms | Unable to be mapped to a subdomain | Treatment for neurodevelopmental disorder | Intervention for neurodevelopmental disorder                                        |

|                                 |           |                         |                                                                                                     |
|---------------------------------|-----------|-------------------------|-----------------------------------------------------------------------------------------------------|
| Clinical diagnoses and symptoms | ADHD      | A-TAC                   | The Autism - Tics, ADHD and other Comorbidities Inventory: Attention Deficit Hyperactivity Disorder |
| Clinical diagnoses and symptoms | ADHD      | ADHD RS IV              | ADHD Rating Scale IV Preschool Version Inattention                                                  |
| Clinical diagnoses and symptoms | ADHD      | ADHD RS IV              | ADHD Rating Scale IV Preschool Version Impulsivity                                                  |
| Clinical diagnoses and symptoms | Vision    | Blindness               | Blindness Diagnosis                                                                                 |
| Cognition                       | Overall   | BSID-II MDI             | Bayley Scales of Infant Development-2nd edition Mental Development Index                            |
| Cognition                       | Overall   | BSID-III                | Bayley Scales of Infant Development-3rd edition Cognition Scaled/Composite                          |
| Cognition                       | Overall   | Cons IQ                 | Conscription IQ Test                                                                                |
| Cognition                       | Overall   | DAS-II                  | Differential Abilities Scale Second Edition                                                         |
| Cognition                       | Overall   | GMDS                    | Griffiths Mental Development Scale Mental Age                                                       |
| Cognition                       | Overall   | HAWIVA-III              | Hannover-Wechsler Intelligence Scale, 3rd edition Full Scale IQ                                     |
| Cognition                       | Overall   | KET-KID                 | Kognitiver Entwicklungstest für das Kindergartenalter Global Score                                  |
| Cognition                       | Overall   | RAKIT                   | Revised Amsterdam Intelligence Test                                                                 |
| Cognition                       | Overall   | SB-V                    | Stanford-Binet V FSIQ                                                                               |
| Cognition                       | Overall   | TCS                     | Test of Cognitive Skills Total Cognitive                                                            |
| Cognition                       | Overall   | WAIS-IV                 | Wechsler Adult Intelligence Scale Version IV Full Scale Intelligence Quotient                       |
| Cognition                       | Overall   | WASI                    | Wechsler Abbreviated Scale of Intelligence Full Scale IQ                                            |
| Cognition                       | Overall   | WISC-III                | Wechsler Intelligence Scale for Children-3rd edition Full Scale Intelligence Quotient               |
| Cognition                       | Overall   | WISC-III-NL             | Wechsler Intelligence Scale for Children-3rd edition, Dutch version FSIQ                            |
| Cognition                       | Overall   | WISC-IV                 | Wechsler Intelligence Scale for Children-4th edition IQ                                             |
| Cognition                       | Overall   | WJ-III COG              | Woodcock Johnson III Tests of Cognitive Abilities General Intellectual Ability/IQ                   |
| Cognition                       | Overall   | WPPSI-III               | Wechsler Preschool and Primary Scale of Intelligence-3rd Edition FSIQ                               |
| Cognition                       | Overall   | WPPSI-IV (CR)           | Wechsler Preschool and Primary Scale of Intelligence, fourth edition, Chinese version FSIQ          |
| Cognition                       | Overall   | WPPSI-R                 | Wechsler Preschool and Primary Scale of Intelligence-Revised IQ                                     |
| Executive function              | Overall   | BRIEF GEC               | Behavior Rating Inventory of the Executive Functions Global Executive Composite                     |
| Executive function              | Overall   | BRIEF-P GEC             | Behavior Rating Inventory of Executive Function, Preschool version Global Executive Composite       |
| Executive function              | Attention | Attention (unspecified) | Attention: Spatial Forward                                                                          |
| Executive function              | Attention | Bourdon-vos             | Bourdon-vos test                                                                                    |
| Executive function              | Attention | NEPSY-II                | Developmental Neuropsychological Assessment Battery-2nd Edition Auditory Attention                  |
| Executive function              | Attention | TEA-Ch                  | Test of Everyday Attention for Children Sky search task                                             |
| Executive function              | Attention | TEA-Ch                  | Test of Everyday Attention for Children Opposite worlds task                                        |
| Executive function              | Attention | TEA-Ch NL               | Test of Everyday Attention for Children, Dutch Version Sustained Auditory Attention                 |

|                    |             |                                  |                                                                                               |
|--------------------|-------------|----------------------------------|-----------------------------------------------------------------------------------------------|
| Executive function | Attention   | TEA-Ch NL                        | Test of Everyday Attention for Children, Dutch Version Visual Attention                       |
| Executive function | Attention   | WJ-III COG                       | Woodcock Johnson III Tests of Cognitive Abilities Broad Attention                             |
| Executive function | Attention   | WRAML-2                          | Wide Range Assessment of Memory and Learning, second edition Attention/concentration Index    |
| Executive function | Flexibility | DKEFS                            | Delis-Kaplan Executive Function System Trail Making Test Condition 1                          |
| Executive function | Flexibility | DKEFS                            | Delis-Kaplan Executive Function System Trail Making Test Condition 2                          |
| Executive function | Flexibility | DKEFS                            | Delis-Kaplan Executive Function System Trail Making Test Condition 3                          |
| Executive function | Flexibility | DKEFS                            | Delis-Kaplan Executive Function System Trail Making Test Condition 4                          |
| Executive function | Flexibility | DKEFS                            | Delis-Kaplan Executive Function System Trail Making Test Condition 5                          |
| Executive function | Flexibility | DKEFS                            | Delis-Kaplan Executive Function System Tower Test Total Achievement Score                     |
| Executive function | Flexibility | DKEFS                            | Delis-Kaplan Executive Function System Verbal Fluency: Category Fluency                       |
| Executive function | Inhibition  | CPT2                             | Conner's Continuous Performance Test II Detectability                                         |
| Executive function | Inhibition  | CPT2                             | Conner's Continuous Performance Test II Hit Reaction Time                                     |
| Executive function | Inhibition  | CPT2                             | Conner's Continuous Performance Test II Number Commissions                                    |
| Executive function | Inhibition  | CPT2                             | Conner's Continuous Performance Test II Number Omissions                                      |
| Executive function | Inhibition  | CPT2                             | Conner's Continuous Performance Test II Preservations                                         |
| Executive function | Inhibition  | CPT2                             | Conner's Continuous Performance Test II Variability                                           |
| Executive function | Inhibition  | Executive Function (unspecified) | Color-Word Inhibition                                                                         |
| Executive function | Inhibition  | Executive Function (unspecified) | Color-Word Inhibition Switching                                                               |
| Executive function | Inhibition  | Go/no go                         | Go/No go Task                                                                                 |
| Executive function | Inhibition  | NEPSY-II                         | Developmental Neuropsychological Assessment Battery-2nd Edition Fingertap Tapping Repetitions |
| Executive function | Inhibition  | NEPSY-II                         | Developmental Neuropsychological Assessment Battery-2nd Edition Fingertap Tapping Sequences   |
| Executive function | Inhibition  | NEPSY-II                         | Developmental Neuropsychological Assessment Battery-2nd Edition Inhibition                    |
| Executive function | Inhibition  | NEPSY-II                         | Developmental Neuropsychological Assessment Battery-2nd Edition Statue                        |
| Executive function | Inhibition  | TEA-Ch NL                        | Test of Everyday Attention for Children, Dutch Version Response Inhibition                    |
| Executive function | Inhibition  | WCST                             | Wisconsin Card Sort Test: Perseverative Errors                                                |
| Executive function | Inhibition  | WCST                             | Wisconsin Card Sort Test: Perseverative Responses                                             |
| Executive function | Memory      | AVLT                             | Rey Auditory Verbal Learning Test Verbal Learning                                             |
| Executive function | Memory      | AVLT                             | Rey Auditory Verbal Learning Test Verbal Long-term Memory                                     |
| Executive function | Memory      | AVLT                             | Rey Auditory Verbal Learning Test Verbal Recognition Memory                                   |
| Executive function | Memory      | BDS                              | Backward Digit Span Test                                                                      |
| Executive function | Memory      | CMS                              | Children's Memory Scale Numbers                                                               |

|                    |        |                    |                                                                                          |
|--------------------|--------|--------------------|------------------------------------------------------------------------------------------|
| Executive function | Memory | CMS                | Children's Memory Scale Word Lists I                                                     |
| Executive function | Memory | CMS                | Children's Memory Scale Word Lists II                                                    |
| Executive function | Memory | Counting span      | Counting span task                                                                       |
| Executive function | Memory | CVLT-C             | California Verbal Learning Test-Children Total Trials 1-5                                |
| Executive function | Memory | FDS                | Forward Digit Span Test                                                                  |
| Executive function | Memory | G-TVPS             | Gardner Test of Visual-Perceptual Skills Revised: Visual Memory Test                     |
| Executive function | Memory | HKLL               | Hong Kong List Learning                                                                  |
| Executive function | Memory | K-ABC              | Kaufmann Assessment Battery for Children Location Memory                                 |
| Executive function | Memory | KET-KID            | Kognitiver Entwicklungstest fur das Kindergartenalter Verbal Memory                      |
| Executive function | Memory | KET-KID            | Kognitiver Entwicklungstest fur das Kindergartenalter Visual Memory                      |
| Executive function | Memory | NEPSY-II           | Developmental Neuropsychological Assessment Battery-2nd Edition Delayed Memory for Faces |
| Executive function | Memory | NEPSY-II           | Developmental Neuropsychological Assessment Battery-2nd Edition Memory for Faces         |
| Executive function | Memory | NEPSY-II           | Developmental Neuropsychological Assessment Battery-2nd Edition Memory for Names         |
| Executive function | Memory | NEPSY-II           | Developmental Neuropsychological Assessment Battery-2nd Edition Sentence Repetition      |
| Executive function | Memory | RCFT               | Rey Complex Figure Test and Recognition Trial: Copy                                      |
| Executive function | Memory | Recognition Memory | Recognition memory: Color Familiarity                                                    |
| Executive function | Memory | Recognition Memory | Recognition Memory: Color Recollection                                                   |
| Executive function | Memory | Recognition Memory | Recognition Memory: Spatial Familiarity                                                  |
| Executive function | Memory | Recognition Memory | Recognition Memory: Spatial Recollection                                                 |
| Executive function | Memory | TCS                | Test of Cognitive Skills Memory                                                          |
| Executive function | Memory | WAIS-IV            | Wechsler Adult Intelligence Scale Version IV Working Memory                              |
| Executive function | Memory | WISC-IV            | Wechsler Intelligence Scale for Children-4th edition Digit Span                          |
| Executive function | Memory | WJ-III COG         | Woodcock Johnson III Tests of Cognitive Abilities Working Memory                         |
| Executive function | Memory | WMS--CR            | Wechsler Memory Scale-Chinese Revision Digit Span                                        |
| Executive function | Memory | WMS--CR            | Wechsler Memory Scale-Chinese Revision Image Recalling                                   |
| Executive function | Memory | WMS--CR            | Wechsler Memory Scale-Chinese Revision Figure Recognition                                |
| Executive function | Memory | WMS--CR            | Wechsler Memory Scale-Chinese Revision Visual Reproduction                               |
| Executive function | Memory | WMS--CR            | Wechsler Memory Scale-Chinese Revision Verbal-Paired Associates                          |
| Executive function | Memory | WMS--CR            | Wechsler Memory Scale-Chinese Revision Comprehension Memory                              |
| Executive function | Memory | WMS--CR            | Wechsler Memory Scale-Chinese Revision Forward Counting                                  |
| Executive function | Memory | WMS--CR            | Wechsler Memory Scale-Chinese Revision Accumulation                                      |
| Executive function | Memory | WMS--CR            | Wechsler Memory Scale-Chinese Revision Backward Counting                                 |



|                    |                  |                                  |                                                                                                            |
|--------------------|------------------|----------------------------------|------------------------------------------------------------------------------------------------------------|
| Executive function | Memory           | WPPSI-IV (CR)                    | Wechsler Preschool and Primary Scale of Intelligence, fourth edition, Chinese version Working Memory Index |
| Executive function | Memory           | WRAML-2                          | Wide Range Assessment of Memory and Learning, second edition Delayed Verbal Recall Composite               |
| Executive function | Memory           | WRAML-2                          | Wide Range Assessment of Memory and Learning, second edition Design Memory                                 |
| Executive function | Memory           | WRAML-2                          | Wide Range Assessment of Memory and Learning, second edition Design Recognition                            |
| Executive function | Memory           | WRAML-2                          | Wide Range Assessment of Memory and Learning, second edition Story Memory Delay Recall                     |
| Executive function | Memory           | WRAML-2                          | Wide Range Assessment of Memory and Learning, second edition Story Memory Recognition                      |
| Executive function | Memory           | WRAML-2                          | Wide Range Assessment of Memory and Learning, second edition Verbal Learning Delay Recall                  |
| Executive function | Memory           | WRAML-2                          | Wide Range Assessment of Memory and Learning, second edition Verbal Learning Recognition                   |
| Executive function | Memory           | WRAML-2                          | Wide Range Assessment of Memory and Learning, second edition Verbal Memory Index                           |
| Executive function | Memory           | WRAML-2                          | Wide Range Assessment of Memory and Learning, second edition Verbal Recognition Composite                  |
| Executive function | Processing speed | Executive Function (unspecified) | Number-letter Sequencing                                                                                   |
| Executive function | Processing speed | HAWIVA-III                       | Hannover-Wechsler Intelligence Scale, 3rd Processing Speed                                                 |
| Executive function | Processing speed | NEPSY-II                         | Developmental Neuropsychological Assessment Battery-2nd Edition Speeded Naming                             |
| Executive function | Processing speed | NEPSY-II                         | Developmental Neuropsychological Assessment Battery-2nd Edition Word Generation                            |
| Executive function | Processing speed | Processing Speed (unspecified)   | Processing speed: Digit Symbol                                                                             |
| Executive function | Processing speed | Processing Speed (unspecified)   | Processing Speed: Color Naming                                                                             |
| Executive function | Processing speed | Processing Speed (unspecified)   | Processing Speed: Dominant Hand Speed                                                                      |
| Executive function | Processing speed | Processing Speed (unspecified)   | Processing Speed: Letter Sequencing                                                                        |
| Executive function | Processing speed | Processing Speed (unspecified)   | Processing Speed: Non-dominant Hand Speed                                                                  |
| Executive function | Processing speed | Processing Speed (unspecified)   | Processing Speed: Number Sequencing                                                                        |
| Executive function | Processing speed | Processing Speed (unspecified)   | Processing Speed: Verbal Fluency                                                                           |
| Executive function | Processing speed | PVF                              | Phonemic verbal fluency test                                                                               |
| Executive function | Processing speed | SDMT                             | Symbol Digit Modality Test: Oral                                                                           |
| Executive function | Processing speed | SDMT                             | Symbol Digit Modality Test: Written                                                                        |
| Executive function | Processing speed | SVF                              | Semantic Verbal Fluency Test                                                                               |
| Executive function | Processing speed | WAIS-IV                          | Wechsler Adult Intelligence Scale Version IV Processing Speed                                              |
| Executive function | Processing speed | WISC-IV                          | Wechsler Intelligence Scale for Children-4th edition Coding                                                |
| Executive function | Processing speed | WJ                               | Woodcock-Johnson Visual Matching Test                                                                      |
| Executive function | Processing speed | WJ-III COG                       | Woodcock Johnson III Tests of Cognitive Abilities Processing Speed                                         |
| Executive function | Processing speed | WPPSI-III                        | Wechsler Preschool and Primary Scale of Intelligence-3rd Edition Animal House                              |

|                              |                                    |               |                                                                                                              |
|------------------------------|------------------------------------|---------------|--------------------------------------------------------------------------------------------------------------|
| Executive function           | Processing speed                   | WPPSI-III     | Wechsler Preschool and Primary Scale of Intelligence-3rd Edition Processing Speed                            |
| Executive function           | Processing speed                   | WPPSI-IV (CR) | Wechsler Preschool and Primary Scale of Intelligence, fourth edition, Chinese version Processing Speed Index |
| Executive function           | Unable to be mapped to a subdomain | OTB           | Operant Test Battery Conditioned Position Response                                                           |
| Executive function           | Unable to be mapped to a subdomain | OTB           | Operant Test Battery Delayed Match to Sample                                                                 |
| Executive function           | Unable to be mapped to a subdomain | OTB           | Operant Test Battery Incremental Repeated Acquisition                                                        |
| Executive function           | Unable to be mapped to a subdomain | OTB           | Operant Test Battery Progressive Ratio                                                                       |
| Executive function           | Unable to be mapped to a subdomain | OTB           | Operant Test Battery Temporal Response Differentiation                                                       |
| Executive function           | Unable to be mapped to a subdomain | SB-V          | Stanford-Binet V Working Memory                                                                              |
| General development          | Overall                            | AvEDI         | Early Development Instrument (Australia version) Developmentally High Risk                                   |
| General development          | Overall                            | EDI           | Early Development Instrument Total Score                                                                     |
| General development          | Overall                            | EDI           | Early Development Instrument Early Developmental Vulnerability                                               |
| General development          | Overall                            | GMDS          | Griffiths Mental Development Scale General Development Quotient                                              |
| General development          | Overall                            | GMDS-II       | Griffiths Mental Development Scale II General Development Quotient Deficiency                                |
| General development          | No subdomains for this domain      | EDI           | Early Development Instrument Language and Cognitive Development                                              |
| General development          | No subdomains for this domain      | EDI           | Early Development Instrument Multiple Challenge Index                                                        |
| General health and wellbeing | Overall                            | CHQ50         | The Child Health Questionnaire 50 Bodily Pain                                                                |
| General health and wellbeing | Overall                            | CHQ50         | The Child Health Questionnaire 50 Change of Health                                                           |
| General health and wellbeing | Overall                            | CHQ50         | The Child Health Questionnaire 50 General Health                                                             |
| General health and wellbeing | Overall                            | CHQ50         | The Child Health Questionnaire 50 Physical Functioning                                                       |
| General health and wellbeing | No subdomains for this domain      | AvEDI         | Early Development Instrument (Australia): Physical Health and Well-Being                                     |
| General health and wellbeing | No subdomains for this domain      | CHQ           | Child Health Questionnaire                                                                                   |
| General health and wellbeing | No subdomains for this domain      | CHQ50         | The Child Health Questionnaire 50 Parental Time Impact                                                       |
| General health and wellbeing | No subdomains for this domain      | EDI           | Early Development Instrument Physical Health and Well-Being                                                  |
| Language                     | Overall                            | ASQ           | Ages & Stages Questionnaire Communication                                                                    |
| Language                     | Overall                            | BNT           | Boston Naming Test                                                                                           |
| Language                     | Overall                            | BSID-III      | Bayley Scales of Infant Development-3rd edition Receptive and Expressive Language Composite                  |
| Language                     | Overall                            | BSID-III      | Bayley Scales of Infant Development-3rd edition Communication                                                |
| Language                     | Overall                            | CELF          | Clinical Evaluation of Language Fundamentals-Total Language Score                                            |

|          |                                    |                                 |                                                                                               |
|----------|------------------------------------|---------------------------------|-----------------------------------------------------------------------------------------------|
| Language | Overall                            | Child's Communication Checklist | Child's Communication Checklist                                                               |
| Language | Overall                            | CTOPP                           | Comprehensive Test of Phonological Processing: Rapid Naming Composite                         |
| Language | Overall                            | EDI                             | Early Development Instrument Communication Skills and General Knowledge                       |
| Language | Overall                            | GDS                             | Gesell Developmental Schedule Language                                                        |
| Language | Overall                            | GMDS                            | Griffiths Mental Development Scale Hearing and Speech                                         |
| Language | Overall                            | J-ASQ-3                         | Japanese Ages and Stages Questionnaire, Third edition Communication                           |
| Language | Overall                            | KET-KID                         | Kognitiver Entwicklungstest für das Kindergartenalter Verbal Development                      |
| Language | Overall                            | McArthur--Bates                 | McArthur Bates Communicative Development Inventory                                            |
| Language | Overall                            | OLSAT                           | Stanford/Otis-Lennon School Ability Test Language                                             |
| Language | Overall                            | VABS-II                         | Vineland Adaptive Behavior Scales, 2nd edition Communication Standard                         |
| Language | Overall                            | WAIS-III VIQ                    | Wechsler Adult Intelligence Scale 3rd edition Verbal IQ                                       |
| Language | Overall                            | WPPSI-III                       | Wechsler Preschool and Primary Scale of Intelligence-3rd Edition VIQ                          |
| Language | Articulation                       | KET-KID                         | Kognitiver Entwicklungstest für das Kindergartenalter Articulation                            |
| Language | Expressive language                | BSID-III                        | Bayley Scales of Infant Development-3rd edition Expressive Language                           |
| Language | Expressive language                | CELF                            | Clinical Evaluation of Language Fundamentals-Expressive Language Score                        |
| Language | Expressive language                | Expressive Language             | Expressive language composite (Boston naming + D-KEFS)                                        |
| Language | Expressive language                | RDLS                            | Reynell Developmental Language Scales: Expressive Language                                    |
| Language | Expressive language                | WOLD                            | Wechsler Objective Language Dimensions verbal expression task                                 |
| Language | Receptive language                 | BPVS                            | British Picture Vocabulary Scale                                                              |
| Language | Receptive language                 | BSID-III                        | Bayley Scales of Infant Development-3rd edition Receptive Language                            |
| Language | Receptive language                 | CELF                            | Clinical Evaluation of Language Fundamentals-Receptive Language Score                         |
| Language | Receptive language                 | KET-KID                         | Kognitiver Entwicklungstest für das Kindergartenalter Verbal Comprehension                    |
| Language | Receptive language                 | NEPSY-II                        | Developmental Neuropsychological Assessment Battery-2nd Edition Comprehension of Instructions |
| Language | Receptive language                 | PPVT                            | Peabody Picture Vocabulary Test                                                               |
| Language | Receptive language                 | RDLS                            | Reynell Developmental Language Scales: Comprehension                                          |
| Language | Receptive language                 | WOLD                            | Wechsler Objective Language Dimensions comprehension task                                     |
| Language | Unable to be mapped to a subdomain | AvEDI                           | Early Development Instrument (Australia): Language and Cognitive Development                  |
| Language | Unable to be mapped to a subdomain | AvEDI                           | Early Development Instrument (Australia): Communication Skills and General Knowledge          |
| Language | Unable to be mapped to a subdomain | OWLS                            | Oral and Written Language Scales                                                              |

|                |                                    |                  |                                                                                                                  |
|----------------|------------------------------------|------------------|------------------------------------------------------------------------------------------------------------------|
| Language       | Unable to be mapped to a subdomain | Phoneme deletion | Phoneme deletion task                                                                                            |
| Language       | Unable to be mapped to a subdomain | WPPSI-III        | Wechsler Preschool and Primary Scale of Intelligence-3rd Edition Vocabulary                                      |
| Language       | Verbal IQ                          | HAWIVA-III       | Hannover-Wechsler Intelligence Scale, 3rd edition Verbal IQ                                                      |
| Language       | Verbal IQ                          | HK-WISC          | Hong Kong-Wechsler Intelligence Scale for Children General Comprehension                                         |
| Language       | Verbal IQ                          | SB-V             | Stanford-Binet V VIQ                                                                                             |
| Language       | Verbal IQ                          | WAIS-IV          | Wechsler Adult Intelligence Scale Version IV Verbal Comprehension                                                |
| Language       | Verbal IQ                          | WASI             | Wechsler Abbreviated Scale of Intelligence Similarities                                                          |
| Language       | Verbal IQ                          | WASI             | Wechsler Abbreviated Scale of Intelligence Verbal IQ                                                             |
| Language       | Verbal IQ                          | WASI             | Wechsler Abbreviated Scale of Intelligence Vocabulary                                                            |
| Language       | Verbal IQ                          | WISC-III         | Wechsler Intelligence Scale for Children-3rd edition Verbal Intelligence Quotient                                |
| Language       | Verbal IQ                          | WISC-III-NL      | Wechsler Intelligence Scale for Children-3rd edition, Dutch version Verbal IQ                                    |
| Language       | Verbal IQ                          | WPPSI-III        | Wechsler Preschool and Primary Scale of Intelligence-3rd Edition Comprehension                                   |
| Language       | Verbal IQ                          | WPPSI-III        | Wechsler Preschool and Primary Scale of Intelligence-3rd Edition Information                                     |
| Language       | Verbal IQ                          | WPPSI-III        | Wechsler Preschool and Primary Scale of Intelligence-3rd Edition Similarities                                    |
| Language       | Verbal IQ                          | WPPSI-IV (CR)    | Wechsler Preschool and Primary Scale of Intelligence, fourth edition, Chinese version Verbal Comprehension Index |
| Motor function | Overall                            | ABAS-II          | Adaptive Behavior Assessment System-2nd edition Motor Composite Score                                            |
| Motor function | Overall                            | AIMS             | Alberta Infant Motor Scale                                                                                       |
| Motor function | Overall                            | BSID-II PDI      | Bayley Scales of Infant Development-2nd edition Psychomotor Development Index                                    |
| Motor function | Overall                            | BSID-III         | Bayley Scales of Infant Development-3rd edition Motor Composite                                                  |
| Motor function | Overall                            | GDS              | Gesell Developmental Schedule Movement                                                                           |
| Motor function | Overall                            | KET-KID          | Kognitiver Entwicklungstest für das Kindergartenalter Psychomotor Development                                    |
| Motor function | Overall                            | M-ABC            | Movement Assessment Battery for Children Total Score                                                             |
| Motor function | Overall                            | MAND             | McCarren Assessment of Neuromuscular Development                                                                 |
| Motor function | Overall                            | PDMS             | Peabody Developmental Motor Scales                                                                               |
| Motor function | Overall                            | VABS-II          | Vineland Adaptive Behavior Scales, 2nd edition Motor Skills                                                      |
| Motor function | Fine motor                         | ASQ              | Ages & Stages Questionnaire Fine Motor                                                                           |
| Motor function | Fine motor                         | Beery-Buktenica  | Beery-Buktenica Developmental Test: Motor Coordination, Grooved Pegboard Dominant Hand                           |
| Motor function | Fine motor                         | Beery-Buktenica  | Beery-Buktenica Developmental Test: Visual Perception, Judgment of Line Orientation                              |
| Motor function | Fine motor                         | BSID-III         | Bayley Scales of Infant Development-3rd edition Fine Motor                                                       |
| Motor function | Fine motor                         | Fine motor       | Fine motor composite (Beery Motor + grooved pegboard)                                                            |
| Motor function | Fine motor                         | GMDS             | Griffiths Mental Development Scale Eye/Hand                                                                      |

|                      |                                       |                 |                                                                                           |
|----------------------|---------------------------------------|-----------------|-------------------------------------------------------------------------------------------|
| Motor function       | Fine motor                            | GPT             | Grooved Pegboard Test Dominant Hand                                                       |
| Motor function       | Fine motor                            | GPT             | Grooved Pegboard Test Fine Motor                                                          |
| Motor function       | Fine motor                            | GPT             | Grooved Pegboard Test Non-Dominant Hand                                                   |
| Motor function       | Fine motor                            | J-ASQ-3         | Japanese Ages and Stages Questionnaire, Third edition<br>Fine motor                       |
| Motor function       | Fine motor                            | M-ABC           | Movement Assessment Battery for Children Manual<br>Dexterity                              |
| Motor function       | Fine motor                            | M-ABC           | Movement Assessment Battery for Children Preferred<br>hand peg placing                    |
| Motor function       | Fine motor                            | M-ABC           | Movement Assessment Battery for Children<br>Nonpreferred hand peg placing                 |
| Motor function       | Fine motor                            | Wallin          | Wallin B pegboard from the Merrill-Palmer Scale of<br>Mental Test                         |
| Motor function       | Gross motor                           | Ambulation      | Ability to ambulate                                                                       |
| Motor function       | Gross motor                           | ASQ             | Ages & Stages Questionnaire Gross Motor                                                   |
| Motor function       | Gross motor                           | BSID-III        | Bayley Scales of Infant Development-3rd edition Gross<br>Motor                            |
| Motor function       | Gross motor                           | GMDS            | Griffiths Mental Development Scale Motor                                                  |
| Motor function       | Gross motor                           | J-ASQ-3         | Japanese Ages and Stages Questionnaire, Third edition<br>Gross motor                      |
| Motor function       | Gross motor                           | M-ABC           | Movement Assessment Battery for Children Balance<br>Skills                                |
| Motor function       | Gross motor                           | M-ABC           | Movement Assessment Battery for Children Ball Skills                                      |
| Motor function       | Gross motor                           | M-ABC           | Movement Assessment Battery for Children Heel-to-toe<br>walking task                      |
| Motor function       | Gross motor                           | M-ABC           | Movement Assessment Battery for Children Bean bag<br>throwing task                        |
| Motor function       | Unable to be mapped<br>to a subdomain | Beery-Buktenica | Beery-Buktenica Developmental Test of Visual Motor<br>Integration                         |
| Non-verbal reasoning | No subdomains for<br>this domain      | WAIS-IV         | Wechsler Adult Intelligence Scale Version IV Perceptual<br>Reasoning                      |
| Nonverbal reasoning  | Overall                               | CPM             | Raven's Colored Progressive Matrices                                                      |
| Nonverbal reasoning  | Overall                               | HAWIVA-III      | Hannover-Wechsler Intelligence Scale, 3rd edition<br>Nonverbal IQ                         |
| Nonverbal reasoning  | Overall                               | RSPM            | Raven's Standard Progressive Matrices: IQ                                                 |
| Nonverbal reasoning  | Overall                               | SON-R           | Hogrefe/Snijders-Oomen Non-Verbal Intelligence Test-<br>Revised IQ                        |
| Nonverbal reasoning  | Overall                               | WASI            | Wechsler Abbreviated Scale of Intelligence<br>Performance IQ                              |
| Nonverbal reasoning  | Overall                               | WISC-III        | Wechsler Intelligence Scale for Children-3rd edition<br>Performance Intelligence Quotient |
| Nonverbal reasoning  | Overall                               | WISC-III-NL     | Wechsler Intelligence Scale for Children-3rd edition,<br>Dutch version Performance IQ     |
| Nonverbal reasoning  | Overall                               | WPPSI-III       | Wechsler Preschool and Primary Scale of Intelligence-<br>3rd Edition PIQ                  |
| Nonverbal reasoning  | No subdomains for<br>this domain      | K-ABC           | Kaufmann Assessment Battery for Children Picture                                          |
| Nonverbal reasoning  | No subdomains for<br>this domain      | K-ABC           | Kaufmann Assessment Battery for Children Triangle                                         |
| Nonverbal reasoning  | No subdomains for<br>this domain      | K-ABC           | Kaufmann Assessment Battery for Children Visual<br>Analogy                                |
| Nonverbal reasoning  | No subdomains for<br>this domain      | KET-KID         | Kognitiver Entwicklungstest für das Kindergartenalter<br>Nonverbal Development            |

|                     |                               |           |                                                                                     |
|---------------------|-------------------------------|-----------|-------------------------------------------------------------------------------------|
| Nonverbal reasoning | No subdomains for this domain | KET-KID   | Kognitiver Entwicklungstest für das Kindergartenalter Visual Perception             |
| Nonverbal reasoning | No subdomains for this domain | KET-KID   | Kognitiver Entwicklungstest für das Kindergartenalter Visuoconstruction             |
| Nonverbal reasoning | No subdomains for this domain | NEPSY-II  | Developmental Neuropsychological Assessment Battery-2nd Edition Design Copy         |
| Nonverbal reasoning | No subdomains for this domain | SB-V      | Stanford-Binet V Nonverbal IQ                                                       |
| Nonverbal reasoning | No subdomains for this domain | WASI      | Wechsler Abbreviated Scale of Intelligence Block Design                             |
| Nonverbal reasoning | No subdomains for this domain | WASI      | Wechsler Abbreviated Scale of Intelligence Matrix Reasoning                         |
| Nonverbal reasoning | No subdomains for this domain | WPPSI-III | Wechsler Preschool and Primary Scale of Intelligence-3rd Edition Block Design       |
| Nonverbal reasoning | No subdomains for this domain | WPPSI-III | Wechsler Preschool and Primary Scale of Intelligence-3rd Edition Geometric Design   |
| Nonverbal reasoning | No subdomains for this domain | WPPSI-III | Wechsler Preschool and Primary Scale of Intelligence-3rd Edition Mazes              |
| Nonverbal reasoning | No subdomains for this domain | WPPSI-III | Wechsler Preschool and Primary Scale of Intelligence-3rd Edition Picture Completion |
| Sensory             | No subdomains for this domain | ITSP      | Infant/toddler Sensory Profile Auditory Processing                                  |
| Sensory             | No subdomains for this domain | ITSP      | Infant/toddler Sensory Profile Low Threshold                                        |
| Sensory             | No subdomains for this domain | ITSP      | Infant/toddler Sensory Profile Oral Processing                                      |
| Sensory             | No subdomains for this domain | ITSP      | Infant/toddler Sensory Profile Low Registration                                     |
| Sensory             | No subdomains for this domain | ITSP      | Infant/toddler Sensory Profile Sensation Seeking                                    |
| Sensory             | No subdomains for this domain | ITSP      | Infant/toddler Sensory Profile Sensory Sensitivity                                  |
| Sensory             | No subdomains for this domain | ITSP      | Infant/toddler Sensory Profile Sensation Avoiding                                   |
| Sensory             | No subdomains for this domain | ITSP      | Infant/toddler Sensory Profile Tactile Processing                                   |
| Sensory             | No subdomains for this domain | ITSP      | Infant/toddler Sensory Profile Vestibular Processing                                |
| Sensory             | No subdomains for this domain | ITSP      | Infant/toddler Sensory Profile Visual Processing                                    |
| Social-cognition    | Overall                       | CHQ50     | The Child Health Questionnaire 50 Mental Health                                     |
| Social-cognition    | Overall                       | CHQ50     | The Child Health Questionnaire 50 Self-esteem                                       |
| Social-cognition    | Overall                       | CHQ50     | The Child Health Questionnaire 50 Social-Emotional Role                             |
| Social-cognition    | Overall                       | CHQ50     | The Child Health Questionnaire 50 Social-Physical Role                              |
| Social-cognition    | No subdomains for this domain | AvEDI     | Early Development Instrument (Australia): Emotional Health and Maturity             |
| Social-cognition    | No subdomains for this domain | AvEDI     | Early Development Instrument (Australia): Social Knowledge and Competence           |
| Social-cognition    | No subdomains for this domain | BSID-III  | Bayley Scales of Infant Development-3rd edition Social-Emotional                    |
| Social-cognition    | No subdomains for this domain | BSID-III  | Bayley Scales of Infant Development-3rd edition Social                              |
| Social-cognition    | No subdomains for this domain | EDI       | Early Development Instrument Emotional Health and Maturity                          |

|                                 |                                    |                                  |                                                                                                             |
|---------------------------------|------------------------------------|----------------------------------|-------------------------------------------------------------------------------------------------------------|
| Social-cognition                | No subdomains for this domain      | EDI                              | Early Development Instrument Social Knowledge and Competence                                                |
| Social-cognition                | No subdomains for this domain      | NEPSY-II                         | Developmental Neuropsychological Assessment Battery-2nd Edition Affect Recognition                          |
| Social-cognition                | No subdomains for this domain      | NEPSY-II                         | Developmental Neuropsychological Assessment Battery-2nd Edition Theory of Mind                              |
| Social-cognition                | No subdomains for this domain      | Parent Questionnaire             | Parent Social-Emotional Questionnaire                                                                       |
| Social-cognition                |                                    | Social-Emotional                 | Social Emotional Scale                                                                                      |
| Unable to be mapped to a domain | Unable to be mapped to a subdomain | CHQ50                            | The Child Health Questionnaire 50 Family Activities                                                         |
| Unable to be mapped to a domain | Unable to be mapped to a subdomain | CHQ50                            | The Child Health Questionnaire 50 Family Cohesion                                                           |
| Unable to be mapped to a domain | Unable to be mapped to a subdomain | CHQ50                            | The Child Health Questionnaire 50 Parental Emotional Impact                                                 |
| Unable to be mapped to a domain | Unable to be mapped to a subdomain | Executive Function (unspecified) | 20 Questions                                                                                                |
| Unable to be mapped to a domain | Unable to be mapped to a subdomain | GDS                              | Gesell Developmental Schedule Response to Objects                                                           |
| Unable to be mapped to a domain | Unable to be mapped to a subdomain | GDS                              | Gesell Developmental Schedule Response to People                                                            |
| Unable to be mapped to a domain | Unable to be mapped to a subdomain | SB-V                             | Stanford-Binet V Fluid Reasoning                                                                            |
| Unable to be mapped to a domain | Unable to be mapped to a subdomain | SB-V                             | Stanford-Binet V Knowledge                                                                                  |
| Unable to be mapped to a domain | Unable to be mapped to a subdomain | SB-V                             | Stanford-Binet V Quantitative Reasoning                                                                     |
| Unable to be mapped to a domain | Unable to be mapped to a subdomain | SB-V                             | Stanford-Binet V Visual-spatial Processing                                                                  |
| Unable to be mapped to a domain | Unable to be mapped to a subdomain | WASI                             | Wechsler Abbreviated Scale of Intelligence Matrix Vocab                                                     |
| Unable to be mapped to a domain | Unable to be mapped to a subdomain | WPPSI-IV (CR)                    | Wechsler Preschool and Primary Scale of Intelligence, fourth edition, Chinese version Visual-Spatial Index  |
| Unable to be mapped to a domain | Unable to be mapped to a subdomain | WPPSI-IV (CR)                    | Wechsler Preschool and Primary Scale of Intelligence, fourth edition, Chinese version Fluid Reasoning Index |

**eTable 4. Outcomes From Each of the 108 Reviewed Studies**

| Study                                                 | List of outcomes                                                                                                                                                                                                                                            |
|-------------------------------------------------------|-------------------------------------------------------------------------------------------------------------------------------------------------------------------------------------------------------------------------------------------------------------|
| Ludman et al, <sup>23</sup> 1990                      | GMDS development quotient, GMDS eye/hand, GMDS hearing and speech, GMDS mental age, GMDS motor, GMDS performance, GMDS personal/social                                                                                                                      |
| Ludman et al, <sup>24</sup> 1993                      | BPVS, GMDS development quotient, GMDS eye/hand, GMDS performance, RDLs comprehension, RDLs expressive language, Wallin B pegboard                                                                                                                           |
| The Victorian Infant Collaboration <sup>25</sup> 1996 | Blindness, Cerebral palsy diagnosis, Hearing impairment, WISC-III FSIQ, WPPSI-R IQ                                                                                                                                                                          |
| Kayaalp et al, <sup>26</sup> 2006                     | CBCL aggressive behavior, CBCL anxious/depressed, CBCL attention problems, CBCL delinquent behavior, CBCL externalizing, CBCL internalizing, CBCL social problems, CBCL somatic complaints, CBCL thought problems, CBCL total problems, CBCL withdrawn, CDI |
| Bartels et al, <sup>27</sup> 2009                     | CTRS-R:S, National standardized test score                                                                                                                                                                                                                  |
| DiMaggio et al, <sup>28</sup> 2009                    | Psychiatric diagnoses                                                                                                                                                                                                                                       |
| Kalkman et al, <sup>29</sup> 2009                     | CBCL externalizing, CBCL internalizing, CBCL total problems, Psychiatric interview                                                                                                                                                                          |
| Majnemer et al, <sup>30</sup> 2009                    | CBCL total problems, CHQ, PDMS, PPVT, VABS-I daily living, VABS-I socialization, WeeFIM, WPPSI-R IQ,                                                                                                                                                        |
| Wilder et al, <sup>31</sup> 2009                      | Learning disability diagnosis                                                                                                                                                                                                                               |
| Fan et al, <sup>32</sup> 2010                         | GDS language, GDS movement, GDS response to objects, GDS response to people                                                                                                                                                                                 |
| Walker et al, <sup>33</sup> 2010                      | BSID-III cognition, BSID-III expressive language, BSID-III fine motor, BSID-III gross motor, BSID-III receptive language, Parent social-emotional questionnaire                                                                                             |
| DiMaggio et al, <sup>34</sup> 2011                    | Psychiatric diagnoses                                                                                                                                                                                                                                       |
| Flick et al, <sup>35</sup> 2011                       | CAT math, CAT phonics, CAT spelling, CAT written language, IEP Emotion/Behavior, IEP Speech/Language, Learning disability diagnosis, TCS memory, TCS total cognitive                                                                                        |
| Hansen et al, <sup>36</sup> 2011                      | National standardized test scores, Teacher rating, Test non-attainment                                                                                                                                                                                      |
| Andropoulos et al, <sup>37</sup> 2012                 | ABS conceptual, ABS general adaptive, ABS practical, ABS social, BSID-III cognition, BSID-III language, BSID-III motor, Social-emotional scale                                                                                                              |
| Block et al, <sup>38</sup> 2012                       | IOWA standardized test, Very poor academic performance overall                                                                                                                                                                                              |
| Filan et al, <sup>39</sup> 2012                       | BSID-II MDI, BSID-II PDI                                                                                                                                                                                                                                    |
| Ing et al, <sup>40</sup> 2012                         | CBCL externalizing, CBCL internalizing, CBCL total problems, CELF-expressive, CELF-receptive, CELF-total, CPM, MAND, PPVT, SDMT oral, SDMT written                                                                                                          |
| Long et al a, <sup>41</sup> 2012                      | AIMS                                                                                                                                                                                                                                                        |
| Long et al b, <sup>42</sup> 2012                      | BSID-III cognition, BSID-III expressive language, BSID-III fine motor, BSID-III gross motor, BSID-III language composite, BSID-III motor composite, BSID-III receptive language                                                                             |
| Rocha et al, <sup>43</sup> 2012                       | GMDS eye/hand, GMDS hearing and speech, GMDS performance, GMFCS, Hearing impairment                                                                                                                                                                         |
| Sananes et al, <sup>44</sup> 2012                     | ASQ communication, ASQ fine motor, ASQ gross motor, ASQ personal/social, ASQ problem solving, BSID-II MDI, PDMS                                                                                                                                             |
| Sprung et al, <sup>45</sup> 2012                      | ADHD Diagnosis                                                                                                                                                                                                                                              |
| Walker et al, <sup>46</sup> 2012                      | BSID-III cognition, BSID-III expressive language, BSID-III fine motor, BSID-III gross motor, BSID-III receptive language                                                                                                                                    |
| Yang et al, <sup>47</sup> 2012                        | K-ABC location memory, K-ABC picture, K-ABC triangle, K-ABC visual analogy                                                                                                                                                                                  |
| Bong et al, <sup>48</sup> 2013                        | Learning disability diagnosis, PSLE                                                                                                                                                                                                                         |



|                                         |                                                                                                                                                                                                                                                                                                                                                       |
|-----------------------------------------|-------------------------------------------------------------------------------------------------------------------------------------------------------------------------------------------------------------------------------------------------------------------------------------------------------------------------------------------------------|
| Fan et al, <sup>49</sup> 2013           | WPPSI-III animal house, WPPSI-III arithmetic, WPPSI-III block design, WPPSI-III comprehension, WPPSI-III FSIQ, WPPSI-III geometric design, WPPSI-III information, WPPSI-III mazes, WPPSI-III picture completion, WPPSI-III PIQ, WPPSI-III similarities, WPPSI-III vocabulary, WPPSI-III VIQ                                                           |
| Hansen et al, <sup>50</sup> 2013        | National standardized test, teacher rating, test score non-attainment                                                                                                                                                                                                                                                                                 |
| Minutillo et al, <sup>51</sup> 2013     | Blindness, Hearing impairment, Cerebral palsy diagnosis, GMDS development quotient                                                                                                                                                                                                                                                                    |
| Andropoulos et al, <sup>52</sup> 2014   | BSID-III cognitive, BSID-III language, BSID-III motor                                                                                                                                                                                                                                                                                                 |
| Cheng et al, <sup>53</sup> 2014         | BSID-II PDI, BSID-II MDI                                                                                                                                                                                                                                                                                                                              |
| Garcia Guerra et al, <sup>54</sup> 2014 | ABAS-II general adaptive composite, Beery VMI, WPPSI-III FSIQ, WPPSI-III PIQ, WPPSI-III VIQ                                                                                                                                                                                                                                                           |
| Gaynor et al, <sup>55</sup> 2014        | ADHD rating scale IV impulsivity, ADHD rating scale IV inattention, Beery VMI, CBCL pervasive developmental problem scale, WPPSI-III FSIQ, WPPSI-III PIQ, WPPSI-III processing speed, WPPSI-III VIQ, Woodcock-Johnson III mathematics, Woodcock-Johnson III reading                                                                                   |
| Ing et al a, <sup>56</sup> 2014         | CELF-expressive CELF-receptive, CELF-total, CPM, ICD-9 CM mental disorder diagnosis, WAMSE numeracy, WAMSE reading, WAMSE spelling, WAMSE writing                                                                                                                                                                                                     |
| Ing et al b, <sup>57</sup> 2014         | CBCL externalizing, CBCL internalizing, CBCL total problems, CELF-expressive, CELF-receptive, CELF-total, CPM, MAND, PPVT, SDMT oral, SDMT written                                                                                                                                                                                                    |
| Ko et al, <sup>58</sup> 2014            | ADHD Diagnosis                                                                                                                                                                                                                                                                                                                                        |
| Morriss et al, <sup>59</sup> 2014       | Blindness, BSID-III cognition, BSID-II MDI, BSID-II PDI, GMFCS, Hearing impairment                                                                                                                                                                                                                                                                    |
| Stratmann et al, <sup>60</sup> 2014     | CBCL total problems, Recognition memory color familiarity, Recognition memory color recognition, Recognition memory spatial familiarity, Recognition memory spatial recollection, WASI FSIQ, WASI PIQ, WASI VIQ                                                                                                                                       |
| Williams et al, <sup>61</sup> 2014      | IEP need, Vermont SAT math, Vermont SAT reading, Very poor academic performance math, Very poor academic performance reading                                                                                                                                                                                                                          |
| Yin et al, <sup>62</sup> 2014           | WMS-CR accumulation, WMS-CR backward counting, WMS-CR comprehension memory, WMS-CR digit span, WMS-CR figure recognition, WMS-CR forward counting, WMS-CR image recalling, WMS-CR verbal-paired associates, WMS-CR visual reproduction                                                                                                                |
| Backeljauw et al, <sup>63</sup> 2015    | OWLS, WISC-III FSIQ, WISC-III PIQ, WISC-III VIQ                                                                                                                                                                                                                                                                                                       |
| Bakri et al, <sup>64</sup> 2015         | CBCL aggressive behavior, CBCL anxious/depressed, CBCL emotionally reactive, CBCL externalizing, CBCL internalizing, CBCL sleep problems, CBCL somatic complaints, CBCL withdrawn, DSM-IV 3-point scale                                                                                                                                               |
| Gano et al, <sup>65</sup> 2015          | WPPSI-III FSIQ, WPPSI-III PIQ, WPPSI-III VIQ                                                                                                                                                                                                                                                                                                          |
| Hansen et al, <sup>66</sup> 2015        | National standardized test, Teacher evaluations, Test-score non-attainment                                                                                                                                                                                                                                                                            |
| Ko et al, <sup>67</sup> 2015            | Diagnosis of ASD                                                                                                                                                                                                                                                                                                                                      |
| Naguib et al, <sup>68</sup> 2015        | ABAS-II conceptual, ABAS-II general adaptive composite, ABAS-II motor, ABAS-II practical, ABAS-II social, CBCL internalizing, CBCL externalizing, CBCL total problems, SB-V fluid reasoning, SB-V FSIQ, SB-V knowledge, SB-V nonverbal IQ, SB-V quantitative reasoning, SB-V VIQ, SB-V visual-spatial processing, SB-V working memory                 |
| Petrácková et al, <sup>69</sup> 2015    | CHQ 50 bodily pain, CHQ 50 change of health, CHQ 50 family activities, CHQ 50 family cohesion, CHQ 50 general behavior, CHQ 50 general health, CHQ 50 mental health, CHQ 50 parental emotional impact, CHQ 50 parental time impact, CHQ 50 physical functioning, CHQ 50 self-esteem, CHQ 50 social-emotional role, CHQ 50 social-physical role, SON-R |
| Taghon et al, <sup>70</sup> 2015        | Go/No go task                                                                                                                                                                                                                                                                                                                                         |
| Aun et al, <sup>71</sup> 2016           | G-TVPS, HK-WISC general comprehension, HKLL, Woodcock-Johnson Visual Matching Test                                                                                                                                                                                                                                                                    |

|                                                     |                                                                                                                                                                                                                                                                                                                                                                                                                                                                                                                                                                                                                                                             |
|-----------------------------------------------------|-------------------------------------------------------------------------------------------------------------------------------------------------------------------------------------------------------------------------------------------------------------------------------------------------------------------------------------------------------------------------------------------------------------------------------------------------------------------------------------------------------------------------------------------------------------------------------------------------------------------------------------------------------------|
| Davidson et al, <sup>72</sup> 2016                  | BSID-III adaptive behavior, BSID-III cognition, BSID-III communication, BSID-III community use, BSID-III expressive language, BSID-III fine motor, BSID-III functional pre-academics, BSID-III gross motor, BSID-III health and safety, BSID-III home living, BSID-III language composite, BSID-III leisure, BSID-III motor composite, BSID-III receptive language, BSID-III self-care, BSID-III self-direction, BSID-III social, BSID-III social-emotional, McArthur–Bates Communicative Development Inventory                                                                                                                                             |
| Diaz et al, <sup>73</sup> 2016                      | WPPSI-III FSIQ, WPPSI-III PIQ, WPPSI-III processing speed, WPPSI-III VIQ                                                                                                                                                                                                                                                                                                                                                                                                                                                                                                                                                                                    |
| Djurhuus et al, <sup>74</sup> 2016                  | School performance/grades, Test score non-attainment                                                                                                                                                                                                                                                                                                                                                                                                                                                                                                                                                                                                        |
| Doberschuetz et al, <sup>75</sup> 2016              | BSID-II PDI, BSID MDI                                                                                                                                                                                                                                                                                                                                                                                                                                                                                                                                                                                                                                       |
| Graham et al, <sup>76</sup> 2016                    | EDI communication skills/general knowledge, EDI emotional maturity, EDI language and cognitive development, EDI physical well-being, EDI social competence, EDI total score                                                                                                                                                                                                                                                                                                                                                                                                                                                                                 |
| Hansen et al, <sup>77</sup> 2016                    | GMDS hearing and speech, HAWIVA-III FSIQ, HAWIVA-III nonverbal IQ, HAWIVA-III processing speed, HAWIVA-III VIQ, KET-KID articulation, KET-KID global score, KET-KID nonverbal development, KET-KID psychomotor development, KET-KID verbal comprehension, KET-KID verbal development, KET-KID verbal memory, KET-KID visual memory, KET-KID visual perception, KET-KID visual construction                                                                                                                                                                                                                                                                  |
| Hoffman et al, <sup>78</sup> 2016                   | BSID-III cognition, BSID-III language composite, BSID-III motor composite                                                                                                                                                                                                                                                                                                                                                                                                                                                                                                                                                                                   |
| O'Leary et al, <sup>79</sup> 2016                   | EDI communication skills/general knowledge, EDI early developmental vulnerability, EDI emotional maturity, EDI language and cognitive development, EDI multiple challenge index, EDI physical well-being, EDI social competence                                                                                                                                                                                                                                                                                                                                                                                                                             |
| Poor Zamany Nejat Kermany et al, <sup>80</sup> 2016 | Backward digit span, Forward digit span, Phonetic verbal fluency, Semantic verbal fluency                                                                                                                                                                                                                                                                                                                                                                                                                                                                                                                                                                   |
| Seltzer et al, <sup>81</sup> 2016                   | VABS-II communication standard, VABS-II composite, VABS-II daily living, VABS-II motor skills, VABS-II socialization, VABS-II total sum                                                                                                                                                                                                                                                                                                                                                                                                                                                                                                                     |
| Sun et al, <sup>82</sup> 2016                       | ABAS-II conceptual, ABAS-II general adaptive composite, ABAS-II practical, ABAS-II social, BRIEF GEC, CBCL internalizing, CBCL externalizing, CBCL total problems, CPT2 number commissions, CPT2 number omission, CVLTC total trials 1-5, DKEFS TMT conditions 1, 2, 3, 4, & 5, Grooved pegboard dominant hand, Grooved pegboard nondominant hand, NEPSY-II comprehension of instructions, NEPSY-II delayed memory for faces, NEPSY-II memory for faces, NEPSY-II speeded naming, NEPSY-II word generation, WASI block design, WASI FSIQ, WASI matrix reasoning, WASI PIQ, WASI similarities, WASI VIQ, WASI vocabulary, WISC-IV coding, WISC-IV digit span |
| Aly et al, <sup>83</sup> 2017                       | BSID II MDI, BSID-II PDI                                                                                                                                                                                                                                                                                                                                                                                                                                                                                                                                                                                                                                    |
| Birajdar et al, <sup>84</sup> 2017                  | Blindness, Hearing impairment, GMDS development quotient, GMFCS                                                                                                                                                                                                                                                                                                                                                                                                                                                                                                                                                                                             |
| Clausen et al, <sup>85</sup> 2017                   | National standardized exam, Test score non-attainment                                                                                                                                                                                                                                                                                                                                                                                                                                                                                                                                                                                                       |
| Conrad et al, <sup>86</sup> 2017                    | WAIS-III VIQ, WISC-III VIQ                                                                                                                                                                                                                                                                                                                                                                                                                                                                                                                                                                                                                                  |
| de Heer et al, <sup>87</sup> 2017                   | SON-R                                                                                                                                                                                                                                                                                                                                                                                                                                                                                                                                                                                                                                                       |
| Glatz et al, <sup>88</sup> 2017                     | Conscription IQ test, school performance/grades                                                                                                                                                                                                                                                                                                                                                                                                                                                                                                                                                                                                             |
| Harmsen et al, <sup>89</sup> 2017                   | Bourdon-Vos test sustained attention, M-ABC total score, RAKIT, WISC-III NL FSIQ, WISC-III NL PIQ, WISC-III NL VIQ                                                                                                                                                                                                                                                                                                                                                                                                                                                                                                                                          |
| Hu et al, <sup>90</sup> 2017                        | ADHD diagnosis, IEP Emotional/Behavior, IEP Speech/Language, Learning disability diagnosis, OLSAT language, OLSAT mathematics, OLSAT reading, OLSAT spelling, OLSAT total battery                                                                                                                                                                                                                                                                                                                                                                                                                                                                           |
| Ing et al a, <sup>91</sup> 2017                     | ADHD diagnosis, Developmental delay diagnosis, ICD-9 mental disorder diagnosis                                                                                                                                                                                                                                                                                                                                                                                                                                                                                                                                                                              |
| Ing et al b, <sup>92</sup> 2017                     | CELF-expressive, CELF-receptive, CELF-total, CPM                                                                                                                                                                                                                                                                                                                                                                                                                                                                                                                                                                                                            |
| Ing et al c, <sup>93</sup> 2017                     | CBCL internalizing, CBCL externalizing, CBCL total problems, CELF-expressive, CELF-receptive, CELF-total, CPM, MAND, SDMT oral , SDMT written                                                                                                                                                                                                                                                                                                                                                                                                                                                                                                               |

|                                       |                                                                                                                                                                                                                                                                                                                                                                                                                                                                                                                                                                                                                                                                                                                                                                                                                                                                                                                                                                                                                                                                                                                                                                      |
|---------------------------------------|----------------------------------------------------------------------------------------------------------------------------------------------------------------------------------------------------------------------------------------------------------------------------------------------------------------------------------------------------------------------------------------------------------------------------------------------------------------------------------------------------------------------------------------------------------------------------------------------------------------------------------------------------------------------------------------------------------------------------------------------------------------------------------------------------------------------------------------------------------------------------------------------------------------------------------------------------------------------------------------------------------------------------------------------------------------------------------------------------------------------------------------------------------------------|
| Lap et al, <sup>94</sup> 2017         | AVLT verbal learning, AVLT verbal long-term memory, AVLT verbal recognition memory, BRIEF GEC, CBCL total problems, M-ABC balance skills, M-ABC ball skills, M-ABC manual dexterity, M-ABC total score, NEPSY-II design copy, TEA-Ch NL response inhibition, TEA-Ch NL sustained auditory attention, TEA-Ch NL visual attention, WISC-III-NL FSIQ, WISC-III-NL PIQ, WISC-III-NL VIQ                                                                                                                                                                                                                                                                                                                                                                                                                                                                                                                                                                                                                                                                                                                                                                                  |
| Nestor et al, <sup>95</sup> 2017      | Developmental delay, Neurological diagnoses, Psychiatric diagnoses                                                                                                                                                                                                                                                                                                                                                                                                                                                                                                                                                                                                                                                                                                                                                                                                                                                                                                                                                                                                                                                                                                   |
| Terushkin et al, <sup>96</sup> 2017   | Psychiatric diagnoses, School performance/grades                                                                                                                                                                                                                                                                                                                                                                                                                                                                                                                                                                                                                                                                                                                                                                                                                                                                                                                                                                                                                                                                                                                     |
| Zhang et al, <sup>97</sup> 2017       | RSPM IQ                                                                                                                                                                                                                                                                                                                                                                                                                                                                                                                                                                                                                                                                                                                                                                                                                                                                                                                                                                                                                                                                                                                                                              |
| Berghmans et al, <sup>98</sup> 2018   | ITSP low threshold (quadrant 3+4), ITSP oral sensory processing, ITSP quadrant 1 low registration, ITSP quadrant 2 sensation seeking, ITSP quadrant 3 sensory sensitivity, ITSP quadrant 4 sensation, ITSP sensory auditory processing, ITSP tactile processing, ITSP vestibular processing, ITSP visual processing                                                                                                                                                                                                                                                                                                                                                                                                                                                                                                                                                                                                                                                                                                                                                                                                                                                  |
| Castellheim et al, <sup>99</sup> 2018 | A-TAC ADHD, A-TAC ASD, A-TAC learning disabilities                                                                                                                                                                                                                                                                                                                                                                                                                                                                                                                                                                                                                                                                                                                                                                                                                                                                                                                                                                                                                                                                                                                   |
| Hunt et al, <sup>100</sup> 2018       | Blindness, Cerebral palsy diagnosis, DAS-II, GMFCS, Hearing impairment, WISC-III FSIQ, WISC-IV IQ                                                                                                                                                                                                                                                                                                                                                                                                                                                                                                                                                                                                                                                                                                                                                                                                                                                                                                                                                                                                                                                                    |
| Kozanhan et al, <sup>101</sup> 2018   | CPRI                                                                                                                                                                                                                                                                                                                                                                                                                                                                                                                                                                                                                                                                                                                                                                                                                                                                                                                                                                                                                                                                                                                                                                 |
| Lv et al, <sup>102</sup> 2018         | BSID-II MDI, BSID-II PDI                                                                                                                                                                                                                                                                                                                                                                                                                                                                                                                                                                                                                                                                                                                                                                                                                                                                                                                                                                                                                                                                                                                                             |
| Schneuer et al, <sup>103</sup> 2018   | AvEDI communication skills and general knowledge, AvEDI emotional health and maturity, AvEDI language and cognitive development, AvEDI physical health and well-being, AvEDI social knowledge and competence, AvEDI developmentally high risk, NAPLAN numeracy, NAPLAN reading                                                                                                                                                                                                                                                                                                                                                                                                                                                                                                                                                                                                                                                                                                                                                                                                                                                                                       |
| Tsai et al, <sup>104</sup> 2018       | ICD-9-CM ADHD diagnosis                                                                                                                                                                                                                                                                                                                                                                                                                                                                                                                                                                                                                                                                                                                                                                                                                                                                                                                                                                                                                                                                                                                                              |
| Warner et al, <sup>105</sup> 2018     | Beery motor coordination, Beery visual perception, Beery VMI, Boston Naming Test, BRIEF GEC, CBCL ADHD problems, CBCL externalizing problems, CBCL Internalizing, CBCL total problems, CLDQ math scale, CLDQ reading scale, CPT2 detectability, CPT2 hit reaction time, CPT2 number of commissions, CPT2 number of omission, CPT2 variability, CTOPP rapid naming composite score, D-KEFS trail making test (conditions 1-5), D-KEFS tower test, D-KEFS verbal fluency: categorical fluency, Expressive language composite, Fine motor composite, Grooved pegboard dominant hand, Grooved pegboard fine motor, Grooved pegboard nondominant hand, WASI FSIQ, WASI matrix reasoning, WASI matrix vocab, WASI vocabulary, Wisconsin Card Sort: preservative responses, Wisconsin Card Sort: preservative errors, WRAML-2: attention/concentration index, WRAML-2 delayed verbal recall composite, WRAML-2 design memory, WRAML-2 design recognition, WRAML-2 story memory delay recall, WRAML-2 story memory recognition, WRAML-2 verbal learning delay recall, WRAML-2 verbal learning recognition, WRAML-2 verbal memory index, WRAML-2 verbal recognition composite |
| Banerjee et al, <sup>106</sup> 2019   | Attention spatial forward, BDS, CPT2 number commissions, CPT2 number omission, CPT2 preservations, Educational attainment, Executive function 20 questions, Executive function color word inhibition, Executive function color word inhibition switching, Executive function number-letter sequencing, FDS, Processing speed color naming, Processing speed digit symbol, Processing speed dominant hand speed, Processing speed letter sequencing, Processing speed non-dominant hand speed, Processing speed number sequencing, Processing speed verbal fluency, RCFT, WASI block design                                                                                                                                                                                                                                                                                                                                                                                                                                                                                                                                                                           |
| Khochfe et al, <sup>107</sup> 2019    | ECBI                                                                                                                                                                                                                                                                                                                                                                                                                                                                                                                                                                                                                                                                                                                                                                                                                                                                                                                                                                                                                                                                                                                                                                 |

|                                        |                                                                                                                                                                                                                                                                                                                                                                                                                                                                                                                                                                                                                                                                                                                                                                                                                                                                                                                                                                                                                                    |
|----------------------------------------|------------------------------------------------------------------------------------------------------------------------------------------------------------------------------------------------------------------------------------------------------------------------------------------------------------------------------------------------------------------------------------------------------------------------------------------------------------------------------------------------------------------------------------------------------------------------------------------------------------------------------------------------------------------------------------------------------------------------------------------------------------------------------------------------------------------------------------------------------------------------------------------------------------------------------------------------------------------------------------------------------------------------------------|
| McCann et al, <sup>108</sup> 2019      | ABAS-II general adaptive composite, ADHD diagnosis, ASD diagnosis, Blindness, BRIEF-P GEC, CBCL externalizing, CBCL internalizing, CBCL total problems, Cerebral palsy diagnosis, CMS numbers, CMS word lists I, CMS word lists II, Developmental delay, Hearing impairment, NEPSY-II affect recognition, NEPSY-II auditory attention, NEPSY-II design copy, NEPSY-II fingertip tapping repetitions, NEPSY-II fingertip tapping sequences, NEPSY-II inhibition, NEPSY-II memory for names, NEPSY-II sentence repetition, NEPSY-II speed naming, NEPSY-II statue, NEPSY-II theory of mind, NEPSY-II word generation, WIAT-II numerical composite, WIAT-II word reading, WIAT-II spelling, , WPPSI-III FSIQ, WPPSI-III performance IQ, WPPSI-III processing speed, WPPSI-III verbal IQ                                                                                                                                                                                                                                               |
| O'Leary et al, <sup>109</sup> 2019     | EDI communication skills and general knowledge, EDI early developmental vulnerability, EDI emotional healthy and maturity, EDI language and cognitive development, EDI multiple challenge index, EDI physical health and well-being, EDI social knowledge and competence                                                                                                                                                                                                                                                                                                                                                                                                                                                                                                                                                                                                                                                                                                                                                           |
| Sun et al, <sup>110</sup> 2019         | BSID-II MDI, BSID-II PDI                                                                                                                                                                                                                                                                                                                                                                                                                                                                                                                                                                                                                                                                                                                                                                                                                                                                                                                                                                                                           |
| Vedovelli et al, <sup>111</sup> 2019   | Beery VMI, CPM, VABS-I deficiency in subscale, WISC-IV coding                                                                                                                                                                                                                                                                                                                                                                                                                                                                                                                                                                                                                                                                                                                                                                                                                                                                                                                                                                      |
| Warner et al, <sup>112</sup> 2019      | OTB conditioned position response, OTB delayed match to sample, OTB incremental repeated acquisition, OTB progressive ratio, OTB temporal response differentiation                                                                                                                                                                                                                                                                                                                                                                                                                                                                                                                                                                                                                                                                                                                                                                                                                                                                 |
| Zaccariello et al, <sup>113</sup> 2019 | Beery motor coordination, Beery visual perception, Beery VMI, BRIEF GEC, CBCL ADHD problems, CBCL externalizing, CBCL internalizing, CBCL total problems, CLDQ math scale, CLDQ reading scale, CPT2 detectability, CPT2 hit reaction time, CPT2 number of commissions, CPT2 number of omission, CPT2 variability, CTOPP rapid naming composite score, D-KEFS trail making test (conditions 1-5), D-KEFS tower test, D-KEFS verbal fluency: categorical fluency, Grooved pegboard dominant hand, Grooved pegboard nondominant hand, WASI FSIQ, WASI matrix reasoning, WASI vocabulary, Wisconsin Card Sort: preservative responses, Wisconsin Card Sort: preservative errors, WRAML-2: attention/concentration index, WRAML-2 delayed verbal recall composite, WRAML-2 design memory, WRAML-2 design recognition, WRAML-2 story memory delay recall, WRAML-2 story memory recognition, WRAML-2 verbal learning delay recall, WRAML-2 verbal learning recognition, WRAML-2 verbal memory index, WRAML-2 verbal recognition composite |
| Han et al, <sup>114</sup> 2020         | Ambulation, Blindness, Cerebral palsy diagnosis, Educational attainment, Hearing impairment                                                                                                                                                                                                                                                                                                                                                                                                                                                                                                                                                                                                                                                                                                                                                                                                                                                                                                                                        |
| Batta et al, <sup>115</sup> 2020       | GMDS-II GQ deficiency, cerebral palsy, blindness, sensorineural deafness                                                                                                                                                                                                                                                                                                                                                                                                                                                                                                                                                                                                                                                                                                                                                                                                                                                                                                                                                           |
| Feng et al, <sup>116</sup> 2020        | Developmental delay diagnosis                                                                                                                                                                                                                                                                                                                                                                                                                                                                                                                                                                                                                                                                                                                                                                                                                                                                                                                                                                                                      |
| Hakanson et al, <sup>117</sup> 2020    | ADHD diagnosis, educational attainment                                                                                                                                                                                                                                                                                                                                                                                                                                                                                                                                                                                                                                                                                                                                                                                                                                                                                                                                                                                             |
| Ing et al, <sup>118</sup> 2020         | ADHD medication use                                                                                                                                                                                                                                                                                                                                                                                                                                                                                                                                                                                                                                                                                                                                                                                                                                                                                                                                                                                                                |
| Jacola et al, <sup>119</sup> 2020      | Woodcock-Johnson III Test of Academic Achievement Broad Reading, Woodcock-Johnson III test of Cognitive Abilities: General Intellectual Ability/IQ, Broad Attention, Processing Speed, Working Memory                                                                                                                                                                                                                                                                                                                                                                                                                                                                                                                                                                                                                                                                                                                                                                                                                              |
| Kobayashi et al, <sup>120</sup> 2020   | Japanese Ages and Stages Questionnaire, Third Edition (J-ASQ-3): Communication, Gross motor, Fine motor, Problem solving, Personal-social                                                                                                                                                                                                                                                                                                                                                                                                                                                                                                                                                                                                                                                                                                                                                                                                                                                                                          |
| Sedighnejad et al, <sup>121</sup> 2020 | ADHD diagnosis                                                                                                                                                                                                                                                                                                                                                                                                                                                                                                                                                                                                                                                                                                                                                                                                                                                                                                                                                                                                                     |
| Walkden et al, <sup>122</sup> 2020     | Key stage 2 English, Key stage 2 Mathematics, Key stage 2 Science, Key stage 3 English, Key stage 3 Mathematics, Key stage 3 Science, Key stage 4 total points, Key Stage 4 exam entries, Key Stage 2 non-attainment, Key Stage 3 non-attainment, Key stage 4 English A*, A, b, or C grade, Key stage 4 mathematics A*, A, b, or C grade, Key stage 4 science 2 "good" passes (C grade or above), Wechsler Intelligence Scale for Children global intelligence quotient, Wechsler Intelligence Scale for Children verbal intelligence quotient, Test of Everyday Attention for Children: Sky search task (selective attention), Test of Everyday Attention for Children: Opposite worlds task (attentional control/switching), Counting span task (working memory), Wechsler Abbreviated Scale of Intelligence global intelligence quotient, M-ABC Heel-to-toe walking task , M-ABC Preferred hand peg placing, M-ABC Nonpreferred hand peg placing, M-ABC Bean bag                                                                |

|                                      |                                                                                                                                                                                                                                                                                                                                                                                                                                                                                                                          |
|--------------------------------------|--------------------------------------------------------------------------------------------------------------------------------------------------------------------------------------------------------------------------------------------------------------------------------------------------------------------------------------------------------------------------------------------------------------------------------------------------------------------------------------------------------------------------|
|                                      | throwing task, Strengths and Difficulties Questionnaire, Skuse sociocognitive dysfunction score, Child's Communication Checklist, Wechsler Objective Reading Dimensions Basic reading test, Spelling test, Phoneme deletion task, Wechsler Objective Language Dimensions comprehension task, Wechsler Objective Language Dimensions verbal expression task, Real-word reading test, Non-real-word reading test, Test of Word Reading Efficiency word-reading test, Test of Word Reading Efficiency non-word-reading test |
| Gleich et al, <sup>123</sup> 2021    | ADHD diagnosis, LD diagnosis                                                                                                                                                                                                                                                                                                                                                                                                                                                                                             |
| Ing et al, <sup>124</sup> 2021       | CPM, MAND, PPVT, SDMT written, SDMT oral, CELF-Expressive, CELF-Receptive, CELF-Total, CBCL Internalizing, CBCL externalizing, CBCL Total problems                                                                                                                                                                                                                                                                                                                                                                       |
| Lauritzen et al, <sup>125</sup> 2021 | Education attainment, dyslexia, dyscalculia, special needs teaching, educational psychologist counseling, Wechsler Adult Intelligence Scale Version IV (WAIS-IV): FSIQ, verbal comprehension, perceptual reasoning, working memory, processing speed                                                                                                                                                                                                                                                                     |
| Partanen et al, <sup>126</sup> 2021  | Woodcock-Johnson III test of Cognitive Abilities: General Intellectual Ability/IQ, Broad Attention, and Processing Speed                                                                                                                                                                                                                                                                                                                                                                                                 |
| van Hoorn et al, <sup>127</sup> 2021 | M-ABC (Total Impairment Score)                                                                                                                                                                                                                                                                                                                                                                                                                                                                                           |
| Walsh et al, <sup>128</sup> 2021     | BSID-III cognitive, BSID-III language, BSID-III motor                                                                                                                                                                                                                                                                                                                                                                                                                                                                    |
| Warner et al, <sup>129</sup> 2021    | ADHD diagnosis, LD diagnosis, LD reading, LD math, LD writing, IEP speech/language, IEP emotion/behavior                                                                                                                                                                                                                                                                                                                                                                                                                 |
| Zhou et al, <sup>130</sup> 2021      | cerebral palsy diagnosis, developmental delay, hearing or vision impairment, language/behavioral/psychomotor disorder, intervention for "neurodevelopmental problem", WPPSI-IV-CR (Chinese version): FSIQ, Verbal Comprehension Index (VCI), Visual-Spatial Index (VSI), Fluid Reasoning Index (FRI), Working Memory Index (WMI), and Processing Speed Index (PSI)                                                                                                                                                       |

Abbreviations: ABAS-II: Adaptive Behavior Assessment System-2nd Edition, ABS: Adaptive Behavior Scale, ADHD: Attention-deficit/hyperactivity Disorder, AIMS: Alberta Infant Motor Scale, ASD: Autism Spectrum Disorder, ASQ: Ages & Stages Questionnaire, A-TAC: The Autism-Tics, ADHD, and other Comorbidities Inventory, AvEDI: Early Development Instrument (Australia), AVLT: Rey Auditory Verbal Learning Test, BDS: Backward Digit Span Test, BPVS: British Picture Vocabulary Scale, BRIEF-GEC: Behavior Rating Inventory of the Executive Functions Global Executive Composite, BRIEF-P GEC: Behavior Rating Inventory of Executive Function, Preschool version Global Executive Composite, BSID-II Bayley Scales of Infant Development-2nd Edition, BSID-III: Bayley Scales of Infant Development-3rd Edition, CAT: California Achievement Test, CBCL: Child Behavior Checklist, CDI: Children's Depression Inventory, CELF: Clinical Evaluation of Language Fundamentals, CHQ: Child Health Questionnaire, CLDQ: Colorado Learning Difficulties Questionnaire, CMS: Children's Memory Scale, CPM: Raven's Colored Progressive Matrices, CPRI: Child Post-Traumatic Stress Disorder Reaction Index, CPT2: Conner's Continuous Performance Test II, CTOPP: Comprehensive Test of Phonological Processing, CTRS-R:S: Conner's Teacher Rating Scale--Revised: Short Form, CVLT-C: California Verbal Learning Test--Children, DAS-II: Differential Abilities Scale Second Edition, DKEFS: Delis-Kaplan Executive Function System, DSM IV: Diagnostic and Statistical Manual of Mental Disorders--4th Edition, ECBI: Eyberg Child Behavior Inventory, EDI: Early Development Instrument, FDS: Forward Digit Span Test, FSIQ: Full Scale Intelligence Quotient, GDS: Gesell Developmental Schedule, GMDS: Griffiths Mental Development Scale, GMFCS: Gross Motor Function Classification System, GQ: General Development Quotient, G-TVPS: Gardner Test of Visual-Perceptual Skills Revised, HAWIVA-III: Hannover--Wechsler Intelligence Scale, 3rd Edition, HKLL: Hong Kong List Learning, HK-WISC: Hong Kong-Wechsler Intelligence Scale for Children, ICD-9: International Classification of Disease--9th Edition, ICD-9 CM: International Classification of Disease--9th Edition, Clinical Modification, IEP: Individualized Education Plan, IQ: Intelligence Quotient, ITSP: Infant/toddler Sensory Profile, K-ABC: Kaufmann Assessment Battery for Children, KET-KID: Kognitiver Entwicklungstest für das Kindergartenalter, M-ABC: Movement Assessment Battery for Children, MAND: McCarren Assessment of Neuromuscular Development, MDI: Mental Development Index, NAPLAN: National Assessment Program-Literacy and Numeracy, NEPSY-II: Developmental Neuropsychological Assessment Battery-2nd Edition, OLSAT: Stanford/Otis-Lennon School Ability Test, OTB: Operant Test Battery, OWLS: Oral and Written Language Scales, PDI: Psychomotor Development Index, PDMS: Peabody Developmental Motor Scales, PPVT: Peabody Picture Vocabulary Test, PIQ: Performance Intelligence Quotient, PSLE: Primary School Leaving Examination, RAKIT: Revised Amsterdam Intelligence Test, RCFT: Rey Complex Figure Test and Recognition Trial, RDLS: Reynell Developmental Language Scales, RSPM: Raven's Standard Progressive Matrices, SB-V: Stanford-Binet V, SDMT: Symbol Digit Modality Test, SON-R: Hogrefe/Snijders-Oomen Non-Verbal Intelligence Test--Revised, TCS: Test of Cognitive Skills, TEA-Ch NL: Test of Everyday Attention for Children, Dutch Version, TMT: Trial Making Test, VABS-I: Vineland Adaptive Behavior Scales, 1st Edition, VABS-II: Vineland Adaptive Behavior Scales, 2nd Edition, VIQ: Verbal Intelligence Quotient, VMI: Visual-motor Integration, WAIS-III: Wechsler Adult Intelligence Scale 3rd Edition, WAMSE: Western Australian Literacy and Numeracy

Standardized Test, WASI: Wechsler Abbreviated Scale of Intelligence, WIAT-II: Wechsler Individual Achievement Test-2nd Edition, WISC-III: Wechsler Intelligence Scale for Children-3rd Edition, WISC-III-NL: Wechsler Intelligence Scale for Children-3rd Edition, Dutch Version, WISC-IV: Wechsler Intelligence Scale for Children-4th Edition, WMS-CR: Wechsler Memory Scale-- Chinese Revision, WPPSI-III: Wechsler Preschool and Primary Scale of Intelligence-3rd Edition, WPPSI-IV-CR: Wechsler Preschool and Primary Scale of Intelligence-Fourth Edition Chinese Version, WPPSI-R: Wechsler Preschool and Primary Scale of Intelligence-Revised, WRAML-2: Wide Range Assessment of Memory and Learning, 2nd Edition

**eTable 5.** Characteristics of All 108 Reviewed Studies

| Study                                                 | Study Design | Unexposed controls | Number of exposures | Type of Procedure                      | Major comorbidities                | Age at exposure       |
|-------------------------------------------------------|--------------|--------------------|---------------------|----------------------------------------|------------------------------------|-----------------------|
| Ludman et al, <sup>23</sup> 1990                      | PO           | Yes                | NS                  | Emergency neonatal surgery             | Emergency neonatal surgery         | <30 days              |
| Ludman et al, <sup>24</sup> 1993                      | PO           | Yes                | Comb                | Emergency neonatal surgery             | Emergency neonatal surgery         | <30 days              |
| The Victorian Infant Collaboration <sup>25</sup> 1996 | PO           | Yes                | Comb                | Various specified                      | Extreme prematurity                | Birth hospitalization |
| Kayaalp et al, <sup>26</sup> 2006                     | Ret          | No                 | S/M                 | Esophageal dilation                    | Caustic ingestion                  | 4-18 years            |
| Bartels et al, <sup>27</sup> 2009                     | PO           | Yes                | NS                  | Various unspecified                    | No                                 | Variable              |
| DiMaggio et al, <sup>28</sup> 2009                    | Ret          | Yes                | SPM                 | Inguinal hernia repair                 | No                                 | 12-48 months          |
| Kalkman et al, <sup>29</sup> 2009                     | Ret          | No                 | Comb                | Urologic surgery                       | No                                 | Variable              |
| Majnemer et al, <sup>30</sup> 2009                    | PO           | No                 | SPM                 | Heart surgery                          | Congenital heart disease           | <6 months             |
| Wilder et al, <sup>31</sup> 2009                      | Ret          | Yes                | S/M                 | Various specified                      | No                                 | <4 years              |
| Fan et al, <sup>32</sup> 2010                         | PO           | No                 | SPM                 | Heart surgery                          | Congenital heart disease           | <4 years              |
| Walker et al, <sup>33</sup> 2010                      | PO           | Yes                | SPM                 | Pyloromyotomy                          | No                                 | 10-77 days            |
| DiMaggio et al, <sup>34</sup> 2011                    | Ret          | Yes                | Comb                | Various specified                      | No                                 | <3 years              |
| Flick et al, <sup>35</sup> 2011                       | Ret          | Yes                | S/M                 | Various unspecified                    | No                                 | <2 years              |
| Hansen et al, <sup>36</sup> 2011                      | Ret          | Yes                | SPM                 | Inguinal hernia repair                 | No                                 | <1 year               |
| Andropoulos et al, <sup>37</sup> 2012                 | PO           | No                 | SPM                 | Heart surgery                          | Congenital heart disease           | <1 month              |
| Block et al, <sup>38</sup> 2012                       | Ret          | No                 | SPM                 | Various specified                      | No                                 | <1 year               |
| Filan et al, <sup>39</sup> 2012                       | Ret          | Yes                | Comb                | Various specified                      | Extreme prematurity                | 26-41 weeks PMA       |
| Ing et al, <sup>40</sup> 2012                         | Ret          | Yes                | S/M/Comb            | Various specified                      | No                                 | <3 years              |
| Long et al a, <sup>41</sup> 2012                      | PO           | No                 | SPM                 | Heart surgery                          | Congenital heart disease           | <8 weeks              |
| Long et al b, <sup>42</sup> 2012                      | PO           | No                 | NS                  | Heart surgery                          | Congenital heart disease           | <8 weeks              |
| Rocha et al, <sup>43</sup> 2012                       | PO           | No                 | NS                  | Congenital diaphragmatic hernia repair | Congenital diaphragmatic hernia    | <1 month              |
| Sananes et al, <sup>44</sup> 2012                     | PO           | No                 | SPM                 | Heart surgery                          | Congenital heart disease           | <3 months             |
| Sprung et al, <sup>45</sup> 2012                      | Ret          | Yes                | S/M                 | Various unspecified                    | No                                 | <2 years              |
| Walker et al, <sup>46</sup> 2012                      | PO           | Yes                | NS                  | Cardiac and major non-cardiac          | Congenital heart disease and other | <3 months             |
| Yang et al, <sup>47</sup> 2012                        | PO           | No                 | SPM                 | Strabismus surgery                     | No                                 | 5-10 years            |
| Bong et al, <sup>48</sup> 2013                        | Ret          | Yes                | SPM                 | Minor surgery                          | No                                 | <1 year               |

|                                                     |     |     |          |                                      |                               |                      |
|-----------------------------------------------------|-----|-----|----------|--------------------------------------|-------------------------------|----------------------|
| Fan et al, <sup>49</sup> 2013                       | PO  | No  | SPM      | Strabismus surgery                   | No                            | <4 years             |
| Hansen et al, <sup>50</sup> 2013                    | Ret | Yes | SPM      | Pyloromyotomy                        | No                            | <3 months            |
| Minutillo et al, <sup>51</sup> 2013                 | Ret | No  | Comb     | Gastroschisis repair                 | Gastroschisis                 | <1 month             |
| Andropoulos et al, <sup>52</sup> 2014               | Ret | No  | Comb     | Heart surgery                        | Congenital heart disease      | <30 days             |
| Cheng et al, <sup>53</sup> 2014                     | PO  | No  | SPM      | Heart surgery                        | Congenital heart disease      | <3 years             |
| Garcia Guerra et al, <sup>54</sup> 2014             | PO  | No  | SPM      | Heart surgery                        | Congenital heart disease      | <6 weeks             |
| Gaynor et al, <sup>55</sup> 2014                    | Ret | No  | SPM      | Heart surgery                        | Congenital heart disease      | <6 months            |
| Ing et al a, <sup>56</sup> 2014                     | Ret | Yes | Comb     | Various specified                    | No                            | <3 years             |
| Ing et al b, <sup>57</sup> 2014                     | Ret | Yes | Comb     | Various specified                    | No                            | <10 years            |
| Ko et al, <sup>58</sup> 2014                        | Ret | Yes | S/M/Comb | Various unspecified                  | No                            | <3 years             |
| Morriss et al, <sup>59</sup> 2014                   | Ret | Yes | Comb     | Various specified                    | Extreme prematurity           | Variable             |
| Stratmann et al, <sup>60</sup> 2014                 | Amb | Yes | Comb     | Various specified                    | No                            | <1 year              |
| Williams et al, <sup>61</sup> 2014                  | Ret | Yes | S        | Various specified                    | No                            | <1 year              |
| Yin et al, <sup>62</sup> 2014                       | PO  | No  | SPM      | Inguinal hernia repair               | No                            | 7-13 years           |
| Backeljauw et al, <sup>63</sup> 2015                | Ret | Yes | Comb     | Various unspecified                  | No                            | 1 day to 3.8 years   |
| Bakri et al, <sup>64</sup> 2015                     | Ret | Yes | M        | Various unspecified                  | No                            | 1.5-5 years          |
| Gano et al, <sup>65</sup> 2015                      | PO  | No  | S/M      | Various specified                    | Prematurity                   | <42 weeks PMA        |
| Hansen et al, <sup>66</sup> 2015                    | Ret | Yes | SPM      | Neurosurgery                         | Neurosurgical condition       | Not specified        |
| Ko et al, <sup>67</sup> 2015                        | Ret | Yes | S/M/Comb | Various unspecified                  | No                            | <2 years             |
| Naguib et al, <sup>68</sup> 2015                    | PO  | Yes | SPM      | Heart surgery                        | Congenital heart disease      | <1 year              |
| Petrácková et al, <sup>69</sup> 2015                | PO  | No  | S        | Cleft lip repair                     | No                            | 8 days               |
| Taghon et al, <sup>70</sup> 2015                    | Amb | Yes | Comb     | Various specified                    | No                            | 0-2 years            |
| Aun et al, <sup>71</sup> 2016                       | PO  | Yes | S        | Various specified                    | No                            | 5-12 years           |
| Davidson et al, <sup>72</sup> 2016                  | RCT | Yes | SPM      | Inguinal hernia repair               | No                            | <60 weeks PMA        |
| Diaz et al, <sup>73</sup> 2016                      | Ret | No  | Comb     | Heart surgery                        | Congenital heart disease      | <12 months           |
| Djurhuus et al, <sup>74</sup> 2016                  | Ret | Yes | S/M      | Cholesteatoma surgery                | No                            | Mean age 9.1 years   |
| Doberschuetz et al, <sup>75</sup> 2016              | Amb | Yes | Comb     | Gastrointestinal malformation repair | Gastrointestinal malformation | <7 days              |
| Graham et al, <sup>76</sup> 2016                    | Ret | Yes | S/M      | Various specified                    | No                            | <4 years             |
| Hansen et al, <sup>77</sup> 2016                    | Amb | No  | M        | Heart surgery                        | Congenital heart disease      | <5 years             |
| Hoffman et al, <sup>78</sup> 2016                   | Ret | No  | Comb     | cardiac procedures                   | Congenital heart disease      | Variable             |
| O'Leary et al, <sup>79</sup> 2016                   | Ret | Yes | Comb     | Various unspecified                  | No                            | Before age 5.7 years |
| Poor Zamany Nejat Kermany et al, <sup>80</sup> 2016 | Amb | Yes | S/M      | Glaucoma surgery                     | No                            | <3 years             |
| Seltzer et al, <sup>81</sup> 2016                   | Amb | No  | SPM      | Heart surgery                        | Congenital heart disease      | <1 month             |



|                                        |     |     |          |                            |                              |                                  |
|----------------------------------------|-----|-----|----------|----------------------------|------------------------------|----------------------------------|
| Sun et al, <sup>82</sup> 2016          | Amb | Yes | SPM      | Inguinal hernia repair     | No                           | <3 years                         |
| Aly et al, <sup>83</sup> 2017          | PO  | No  | SPM      | Heart surgery              | Congenital heart disease     | <1 month                         |
| Birajdar et al, <sup>84</sup> 2017     | Ret | No  | SPM      | Laparotomy for malrotation | No                           | <5 days (mean)                   |
| Clausen et al, <sup>85</sup> 2017      | Ret | Yes | Comb     | Oral cleft repair          | No                           | 2 months to 2 years              |
| Conrad et al, <sup>86</sup> 2017       | Ret | No  | S/M      | Cleft lip and palate       | No                           | <7 years                         |
| de Heer et al, <sup>87</sup> 2017      | SA  | Yes | NS       | Various unspecified        | No                           | <5 years                         |
| Glatz et al, <sup>88</sup> 2017        | Ret | Yes | S/M      | Various unspecified        | No                           | <4 years                         |
| Harmsen et al, <sup>89</sup> 2017      | Amb | No  | Comb     | Esophageal atresia repair  | Esophageal atresia           | <2 years                         |
| Hu et al, <sup>90</sup> 2017           | Ret | Yes | S/M      | Various unspecified        | No                           | <3 years                         |
| Ing et al a, <sup>91</sup> 2017        | Ret | Yes | S        | Various unspecified        | No                           | <5 years                         |
| Ing et al b, <sup>92</sup> 2017        | Ret | Yes | Comb     | Various unspecified        | No                           | < 3 years                        |
| Ing et al c, <sup>93</sup> 2017        | Ret | Yes | Comb     | Various specified          | No                           | <3 years                         |
| Lap et al, <sup>94</sup> 2017          | Ret | Yes | Comb     | Gastroschisis repair       | Gastroschisis                | Newborn                          |
| Nestor et al, <sup>95</sup> 2017       | Ret | Yes | S/M      | Various unspecified        | No                           | <1 year                          |
| Terushkin et al, <sup>96</sup> 2017    | Amb | No  | M        | Laser procedures           | No                           | <4 years                         |
| Zhang et al, <sup>97</sup> 2017        | PO  | Yes | S        | Orthopedic surgery         | No                           | 6-12 years                       |
| Berghmans et al, <sup>98</sup> 2018    | PO  | No  | S        | Circumcision               | No                           | 18-30 months                     |
| Castellheim et al, <sup>99</sup> 2018  | Ret | Yes | Comb     | Various unspecified        | No                           | 0-12 years                       |
| Hunt et al, <sup>100</sup> 2018        | Ret | Yes | NS       | Various specified          | Extreme prematurity          | Birth hospitalization            |
| Kozanhan et al, <sup>101</sup> 2018    | PO  | Yes | S        | Circumcision               | No                           | 7-12 years                       |
| Lv et al, <sup>102</sup> 2018          | PO  | Yes | S        | Palatoplasty               | No                           | <2 year                          |
| Schneuer et al, <sup>103</sup> 2018    | Ret | Yes | S/M/Comb | Various unspecified        | No                           | <4 years                         |
| Tsai et al, <sup>104</sup> 2018        | Ret | Yes | S/M/Comb | Various unspecified        | No                           | <3 years                         |
| Warner et al, <sup>105</sup> 2018      | Amb | Yes | S/M      | Various specified          | No                           | <3 years                         |
| Banerjee et al, <sup>106</sup> 2019    | Amb | No  | M        | Various unspecified        | Acute Lymphoblastic Leukemia | Multiple exposures, various ages |
| Khochfe et al, <sup>107</sup> 2019     | Amb | Yes | S        | Various unspecified        | No                           | < 2 years                        |
| McCann et al, <sup>108</sup> 2019      | RCT | Yes | SPM      | inguinal hernia            | No                           | <60 weeks                        |
| O'Leary et al, <sup>109</sup> 2019     | Ret | Yes | Comb     | Various unspecified        | No                           | <6 years                         |
| Sun et al, <sup>110</sup> 2019         | PO  | No  | SPM      | Liver transplant           | Biliary atresia              | 5 months to 2 years              |
| Vedovelli et al, <sup>111</sup> 2019   | PO  | No  | SPM      | Heart surgery              | Congenital heart disease     | <5 years                         |
| Warner et al, <sup>112</sup> 2019      | Amb | Yes | S/M      | Various unspecified        | No                           | <3 years                         |
| Zaccariello et al, <sup>113</sup> 2019 | SA  | Yes | S/M      | Various unspecified        | No                           | <3 years                         |

|                                                                                                                                                                                                                                                                                                                                    |     |     |          |                                            |                                     |                     |
|------------------------------------------------------------------------------------------------------------------------------------------------------------------------------------------------------------------------------------------------------------------------------------------------------------------------------------|-----|-----|----------|--------------------------------------------|-------------------------------------|---------------------|
| Han et al, <sup>114</sup> 2020                                                                                                                                                                                                                                                                                                     | Ret | No  | NS       | Surgery for necrotizing enterocolitis      | Necrotizing enterocolitis           | Infancy             |
| Batta et al, <sup>115</sup> 2020                                                                                                                                                                                                                                                                                                   | Ret | No  | Comb     | Gastrointestinal surgery                   | Congenital gastrointestinal disease | Neonatal            |
| Feng et al, <sup>116</sup> 2020                                                                                                                                                                                                                                                                                                    | Ret | Yes | S/M/Comb | Various specified                          | No                                  | < 2 years           |
| Hakanson et al, <sup>117</sup> 2020                                                                                                                                                                                                                                                                                                | Ret | Yes | SPM      | Open laparotomy                            | Congenital gastrointestinal disease | < 1 year            |
| Ing et al, <sup>118</sup> 2020                                                                                                                                                                                                                                                                                                     | Ret | Yes | S        | Various specified                          | No                                  | < 5 years           |
| Jacola et al, <sup>119</sup> 2020                                                                                                                                                                                                                                                                                                  | SA  | No  | M        | Various unspecified                        | Medulloblastoma                     | Mean age 10.2 years |
| Kobayashi et al, <sup>120</sup> 2020                                                                                                                                                                                                                                                                                               | Ret | Yes | S/M      | Various unspecified                        | No                                  | < 1 year            |
| Sedighnejad et al, <sup>121</sup> 2020                                                                                                                                                                                                                                                                                             | Ret | Yes | Comb     | Various unspecified                        | No                                  | < 4 years           |
| Walkden et al, <sup>122</sup> 2020                                                                                                                                                                                                                                                                                                 | Ret | Yes | S/M      | Various specified                          | No                                  | < 4 years           |
| Gleich et al, <sup>123</sup> 2021                                                                                                                                                                                                                                                                                                  | SA  | No  | M        | Various unspecified                        | No                                  | < 3 years           |
| Ing et al, <sup>124</sup> 2021                                                                                                                                                                                                                                                                                                     | Ret | Yes | SPM      | Various specified                          | No                                  | Prenatal            |
| Lauritzen et al, <sup>125</sup> 2021                                                                                                                                                                                                                                                                                               | SA  | No  | SPM      | Atrial or ventricular septal defect repair | Congenital cardiac disease          | Mean age 2.8 years  |
| Partanen et al, <sup>126</sup> 2021                                                                                                                                                                                                                                                                                                | SA  | No  | M        | Various unspecified                        | Medulloblastoma                     | Mean age 10.2 years |
| van Hoorn et al, <sup>127</sup> 2021                                                                                                                                                                                                                                                                                               | Ret | No  | Comb     | Esophageal atresia repair                  | Esophageal atresia                  | Neonatal            |
| Walsh et al, <sup>128</sup> 2021                                                                                                                                                                                                                                                                                                   | SA  | Yes | Comb     | Various specified                          | Prematurity                         | Preterm             |
| Warner et al, <sup>129</sup> 2021                                                                                                                                                                                                                                                                                                  | SA  | Yes | S/M      | Various unspecified                        | No                                  | < 3 years           |
| Zhou et al, <sup>130</sup> 2021                                                                                                                                                                                                                                                                                                    | PO  | Yes | S/M/Comb | Dental procedures                          | No                                  | < 7 years           |
| Abbreviations: PO: Prospective observational, Ret: Retrospective, Amb: Ambidirectional, SA: Secondary analysis, RCT: Randomized controlled trial, S: Single exposure, SPM: Single with possible multiple exposures, M: Multiple exposures, Comb: Combined single and multiple exposures, NS: Not specified, PMA: Postmenstrual age |     |     |          |                                            |                                     |                     |

**eTable 6.** Outcomes of Duplicate Studies or Studies That Did Not Report Outcome Scores That Could Be Evaluated

| Domain                            | Study                                                                          | Outcomes Not Used                                                                                                                                       |                                                                                                   |
|-----------------------------------|--------------------------------------------------------------------------------|---------------------------------------------------------------------------------------------------------------------------------------------------------|---------------------------------------------------------------------------------------------------|
|                                   |                                                                                | Outcome                                                                                                                                                 | Reason for not using                                                                              |
| Academic                          | Hansen et al, <sup>50</sup> 2013                                               | Test score (standardized test and teacher rating) test non-attainment                                                                                   | Same control cohort used in Hansen et al. 2011 <sup>36</sup>                                      |
|                                   | Djurhuus et al, <sup>74</sup> 2016                                             | Test score (standardized test and teacher rating) test non-attainment                                                                                   | Same control cohort used in Hansen et al. 2011 <sup>36</sup>                                      |
|                                   | Clausen et al, <sup>85</sup> 2017                                              | Test score (standardized test and teacher rating) test non-attainment                                                                                   | Same control cohort used in Hansen et al. 2011 <sup>36</sup>                                      |
| Behavioral problems               | Ing et al b, <sup>57</sup> 2014                                                | CBCL Total Problems, Internalizing, Externalizing                                                                                                       | Same control cohort used in Ing et al. 2012 <sup>40</sup>                                         |
|                                   | Ing et al, <sup>118</sup> 2020                                                 | CBCL Total Problems, Internalizing, Externalizing                                                                                                       | Same control cohort used in Ing et al. 2012 <sup>40</sup>                                         |
| Clinical diagnoses and symptoms   | DiMaggio et al, <sup>28</sup> 2009                                             | ICD-9 behavioral and developmental disorders                                                                                                            | Cohort used in Ing et al. 2017 <sup>92</sup> with larger sample size and longer follow-up         |
|                                   | DiMaggio et al, <sup>34</sup> 2011                                             | ICD-9 behavioral and developmental disorders                                                                                                            | Cohort used in Ing et al. 2017 <sup>92</sup> with larger sample size and longer follow-up         |
|                                   | Ko et al, <sup>58</sup> 2014                                                   | ICD-9 ADHD diagnosis                                                                                                                                    | Cohort used in Tsai et al. 2018 <sup>104</sup> with longer follow-up                              |
|                                   | Ko et al, <sup>67</sup> 2015                                                   | ICD-9 ASD diagnosis                                                                                                                                     | Cohort used in Tsai et al. 2018 <sup>104</sup> with longer follow-up                              |
|                                   | Feng et al, <sup>116</sup> 2020                                                | ICD-9 DD diagnosis                                                                                                                                      | Cohort used in Tsai et al. 2018 <sup>104</sup> with more specific diagnoses                       |
|                                   | Ing et al, <sup>118</sup> 2020                                                 | ADHD medication use                                                                                                                                     | Cohort used in Ing et al. 2017a <sup>91</sup> with more outcomes assessed                         |
|                                   | Sedighnejad et al, <sup>121</sup> 2020                                         | ADHD Diagnosis                                                                                                                                          | Risk ratios cannot be calculated from case-control studies                                        |
| Warner et al, <sup>129</sup> 2021 | ADHD, Reading, written, and math LD, IEP Speech/Language, IEP Emotion/Behavior | Cohort used in Wilder et al. 2009 <sup>31</sup> , Flick et al. 2011 <sup>35</sup> , Sprung et al. 2012 <sup>45</sup> , and Hu et al. 2017 <sup>90</sup> |                                                                                                   |
| Executive function                | Ing et al b, <sup>57</sup> 2014                                                | SDMT oral, SDMT written                                                                                                                                 | Not overall scores, and cohort used in Ing et al. 2012 <sup>40</sup>                              |
|                                   | Ing et al, <sup>124</sup> 2021                                                 | SDMT oral, SDMT written                                                                                                                                 | Not overall scores, and control cohort used in Ing et al. 2012 <sup>40</sup>                      |
| General development               | O'Leary et al, <sup>109</sup> 2019                                             | EDI Early Developmental Vulnerability, EDI Multiple Challenge Index, Language and Cognitive Development                                                 | This study is a subanalysis of cohort in O'Leary et al. 2016 <sup>79</sup>                        |
| General health and wellbeing      | Schneuer et al, <sup>103</sup> 2018                                            | AvEDI Physical Health                                                                                                                                   | Not overall score and actual score not reported                                                   |
|                                   | O'Leary et al, <sup>109</sup> 2019                                             | EDI Physical Health                                                                                                                                     | Not overall score, and this study is a subanalysis of cohort in O'Leary et al. 2016 <sup>79</sup> |

|                                                                                                                                                                                                                                                                                                                                                                                                                                                                                                                                                                                 |                                     |                                                   |                                                                                                    |
|---------------------------------------------------------------------------------------------------------------------------------------------------------------------------------------------------------------------------------------------------------------------------------------------------------------------------------------------------------------------------------------------------------------------------------------------------------------------------------------------------------------------------------------------------------------------------------|-------------------------------------|---------------------------------------------------|----------------------------------------------------------------------------------------------------|
| Language                                                                                                                                                                                                                                                                                                                                                                                                                                                                                                                                                                        | Ing et al a, <sup>56</sup> 2014     | CELF total score, CELF expressive, CELF receptive | This study is a subanalysis of cohort in Ing et al. 2012 <sup>40</sup>                             |
|                                                                                                                                                                                                                                                                                                                                                                                                                                                                                                                                                                                 | Ing et al b, <sup>57</sup> 2014     | CELF total score, CELF expressive, CELF receptive | Same control cohort used in Ing et al. 2012 <sup>40</sup>                                          |
|                                                                                                                                                                                                                                                                                                                                                                                                                                                                                                                                                                                 | Aun et al, <sup>71</sup> 2016       | HK-WISC General Comprehension,                    | No score data reported, only lists if improvement or decline                                       |
|                                                                                                                                                                                                                                                                                                                                                                                                                                                                                                                                                                                 | Ing et al b, <sup>92</sup> 2017     | CELF total score, CELF expressive, CELF receptive | Same control cohort used in Ing et al. 2012 <sup>40</sup>                                          |
|                                                                                                                                                                                                                                                                                                                                                                                                                                                                                                                                                                                 | O'Leary et al, <sup>109</sup> 2019  | EDI communication                                 | Not overall score, and this study is a subanalysis of cohort in O'Leary et al. 2016 <sup>79</sup>  |
|                                                                                                                                                                                                                                                                                                                                                                                                                                                                                                                                                                                 | Ing et al, <sup>124</sup> 2021      | CELF total score, CELF expressive, CELF receptive | Same control cohort used in Ing et al. 2012 <sup>40</sup>                                          |
| Motor function                                                                                                                                                                                                                                                                                                                                                                                                                                                                                                                                                                  | Ing et al b, <sup>57</sup> 2014     | MAND                                              | Same control cohort used in Ing et al. 2012 <sup>40</sup>                                          |
|                                                                                                                                                                                                                                                                                                                                                                                                                                                                                                                                                                                 | Ing et al, <sup>124</sup> 2021      | MAND                                              | Same control cohort used in Ing et al. 2012 <sup>40</sup>                                          |
| Nonverbal reasoning                                                                                                                                                                                                                                                                                                                                                                                                                                                                                                                                                             | Ing et al a, <sup>56</sup> 2014     | CPM                                               | Same cohort was used in Ing et al. 2012 <sup>40</sup>                                              |
|                                                                                                                                                                                                                                                                                                                                                                                                                                                                                                                                                                                 | Ing et al b, <sup>57</sup> 2014     | CPM                                               | Same control cohort used in Ing et al. 2012 <sup>40</sup>                                          |
|                                                                                                                                                                                                                                                                                                                                                                                                                                                                                                                                                                                 | Ing et al b, <sup>92</sup> 2017     | CPM                                               | Same control cohort used in Ing et al. 2012 <sup>40</sup>                                          |
|                                                                                                                                                                                                                                                                                                                                                                                                                                                                                                                                                                                 | Zhang et al, <sup>97</sup> 2017     | RSPM                                              | No score data reported, only that there were no differences in IQ                                  |
| Social-cognition                                                                                                                                                                                                                                                                                                                                                                                                                                                                                                                                                                | Walker et al, <sup>33</sup> 2010    | Parental Social Emotional Questionnaire           | No score data reported                                                                             |
|                                                                                                                                                                                                                                                                                                                                                                                                                                                                                                                                                                                 | Schneuer et al, <sup>103</sup> 2018 | AvEDI Emotional Health, Social Knowledge          | Not overall scores and scores not available                                                        |
|                                                                                                                                                                                                                                                                                                                                                                                                                                                                                                                                                                                 | O'Leary et al, <sup>109</sup> 2019  | EDI Emotional Health, EDI Social Knowledge        | Not overall scores, and this study is a subanalysis of cohort in O'Leary et al. 2016 <sup>79</sup> |
| Abbreviations: ADHD: Attention-deficit/hyperactivity Disorder, ASD: Autism Spectrum Disorder, AvEDI: Early Development Instrument (Australia), CBCL: Child Behavior Checklist, CELF: Clinical Evaluation of Language Fundamentals, CPM: Raven's Colored Progressive Matrices, EDI: Early Development Instrument, HK-WISC: Hong Kong-Wechsler Intelligence Scale for Children, ICD-9: International Classification of Disease--9th Edition, MAND: McCarren Assessment of Neuromuscular Development RSPM: Raven's Standard Progressive Matrices, SDMT: Symbol Digit Modality Test |                                     |                                                   |                                                                                                    |

**eTable 7.** Exposure Data Used From Each of the 31 Included Studies

| Study                                | Any exposure                  | Single or possible multiple   | Single    | Multiple               |
|--------------------------------------|-------------------------------|-------------------------------|-----------|------------------------|
| Bartels et al, <sup>27</sup> 2009    | Not specified                 | NA                            | NA        | NA                     |
| Wilder et al, <sup>31</sup> 2009     | Single                        | Single                        | Single    | Multiple (2 exposures) |
| Walker et al, <sup>33</sup> 2010     | Single with possible multiple | Single with possible multiple | NA        | NA                     |
| Flick et al, <sup>35</sup> 2011      | Single                        | Single                        | Single    | Multiple               |
| Hansen et al, <sup>36</sup> 2011     | Single with possible multiple | Single with possible multiple | NA        | NA                     |
| Ing et al, <sup>40</sup> 2012        | Combined                      | Single/NA                     | Single/NA | Multiple/NA            |
| Sprung et al, <sup>45</sup> 2012     | Single                        | Single                        | Single    | Multiple               |
| Bong et al, <sup>48</sup> 2013       | Single with possible multiple | Single with possible multiple | NA        | NA                     |
| Ing et al a, <sup>56</sup> 2014      | Combined                      | NA                            | NA        | NA                     |
| Stratmann et al, <sup>60</sup> 2014  | Combined                      | NA                            | NA        | NA                     |
| Williams et al, <sup>61</sup> 2014   | Single                        | Single                        | Single    | NA                     |
| Backeljauw et al, <sup>63</sup> 2015 | Combined                      | NA                            | NA        | NA                     |
| Bakri et al, <sup>64</sup> 2015      | Multiple                      | NA                            | NA        | Multiple               |
| Davidson et al, <sup>72</sup> 2016   | Single with possible multiple | Single with possible multiple | NA        | NA                     |
| Graham et al, <sup>76</sup> 2016     | Single                        | Single                        | Single    | Multiple               |
| O'Leary et al, <sup>79</sup> 2016    | Combined                      | Single                        | Single    | Multiple (2 exposures) |
| Sun et al, <sup>82</sup> 2016        | Single with possible multiple | Single with possible multiple | NA        | NA                     |
| de Heer et al, <sup>87</sup> 2017    | Not specified                 | NA                            | NA        | NA                     |
| Glatz et al, <sup>88</sup> 2017      | Single                        | Single                        | Single    | Multiple (2 exposures) |
| Hu et al, <sup>90</sup> 2017         | Single                        | Single                        | Single    | Multiple               |
| Ing et al a, <sup>91</sup> 2017      | Single                        | Single                        | Single    | NA                     |
| Nestor et al, <sup>95</sup> 2017     | Single                        | Single                        | Single    | Multiple               |
| Lv et al, <sup>102</sup> 2018        | Single                        | Single                        | Single    | NA                     |
| Schneuer et al, <sup>103</sup> 2018  | Combined                      | Single                        | Single    | Multiple (2 exposures) |
| Tsai et al, <sup>104</sup> 2018      | Combined                      | Single                        | Single    | Multiple               |
| Warner et al, <sup>105</sup> 2018    | Single                        | Single                        | Single    | Multiple               |
| Khochfe et al, <sup>107</sup> 2019   | Single                        | Single                        | Single    | NA                     |
| McCann et al, <sup>108</sup> 2019    | Single with possible multiple | Single with possible Multiple | NA        | NA                     |
| Kobayashi et al, <sup>120</sup> 2020 | Single                        | Single                        | Single    | Multiple (2 exposures) |
| Walkden et al, <sup>122</sup> 2020   | Single                        | Single                        | Single    | Multiple               |
| Zhou et al, <sup>130</sup> 2021      | Single                        | Single                        | Single    | NA                     |
| NA: Not applicable                   |                               |                               |           |                        |

**eTable 8.** Cochrane Risk of Bias Assessment in Randomized Trial

| Study                              | Domain 1:<br>Random<br>sequence<br>generation | Domain 2:<br>Allocation<br>concealment | Domain 3:<br>Blinding of<br>participants and<br>personnel | Domain 4:<br>Blinding of<br>outcome<br>assessment | Domain 5:<br>Incomplete<br>outcome data | Domain 6:<br>Selective<br>reporting |
|------------------------------------|-----------------------------------------------|----------------------------------------|-----------------------------------------------------------|---------------------------------------------------|-----------------------------------------|-------------------------------------|
| Davidson et al, <sup>72</sup> 2016 | Low                                           | Low                                    | High                                                      | High                                              | High                                    | Low                                 |
| McCann et al, <sup>108</sup> 2019  | Low                                           | Low                                    | High                                                      | High                                              | High                                    | Low                                 |

**eTable 9.** Risk of Bias In Nonrandomized Studies or Interventions (ROBINS-I) Assessment of Eligible Nonrandomized Studies

| Study                                | Domain 1: Confounding | Domain : Selection | Domain 3: Classification of intervention | Domain 4: Deviation from interventions | Domain 5: Missing data | Domain 6: Measurement of outcomes | Domain 7: Selection of reported result | ROBINS-I overall |
|--------------------------------------|-----------------------|--------------------|------------------------------------------|----------------------------------------|------------------------|-----------------------------------|----------------------------------------|------------------|
| Bartels et al, <sup>27</sup> 2009    | Moderate              | Low                | Serious                                  | Moderate                               | Serious                | Low                               | Low                                    | Serious          |
| Wilder et al, <sup>31</sup> 2009     | Serious               | Low                | Moderate                                 | Moderate                               | Serious                | Low                               | Low                                    | Serious          |
| Walker et al, <sup>33</sup> 2010     | Serious               | Low                | Low                                      | Moderate                               | Low                    | Low                               | Low                                    | Serious          |
| Flick et al, <sup>35</sup> 2011      | Moderate              | Low                | Moderate                                 | Moderate                               | Serious                | Low                               | Low                                    | Serious          |
| Hansen et al, <sup>36</sup> 2011     | Moderate              | Low                | Moderate                                 | Moderate                               | Low                    | Low                               | Low                                    | Moderate         |
| Ing et al, <sup>40</sup> 2012        | Moderate              | Low                | Moderate                                 | Moderate                               | Low                    | Low                               | Low                                    | Moderate         |
| Sprung et al, <sup>45</sup> 2012     | Moderate              | Low                | Moderate                                 | Moderate                               | Serious                | Low                               | Low                                    | Serious          |
| Bong et al, <sup>48</sup> 2013       | Moderate              | Low                | Moderate                                 | Moderate                               | Moderate               | Low                               | Low                                    | Moderate         |
| Ing et al a, <sup>56</sup> 2014      | Moderate              | Low                | Moderate                                 | Moderate                               | Low                    | Low                               | Low                                    | Moderate         |
| Stratmann et al, <sup>60</sup> 2014  | Serious               | Serious            | Moderate                                 | Moderate                               | Low                    | Moderate                          | Low                                    | Serious          |
| Williams et al, <sup>61</sup> 2014   | Moderate              | Low                | Moderate                                 | Moderate                               | Low                    | Low                               | Low                                    | Moderate         |
| Backeljauw et al, <sup>63</sup> 2015 | Moderate              | Moderate           | Moderate                                 | Moderate                               | Low                    | Low                               | Moderate                               | Moderate         |
| Bakri et al, <sup>64</sup> 2015      | Serious               | Moderate           | Moderate                                 | Moderate                               | Low                    | Moderate                          | Low                                    | Serious          |
| Graham et al, <sup>76</sup> 2016     | Moderate              | Moderate           | Moderate                                 | Moderate                               | Moderate               | Low                               | Moderate                               | Moderate         |
| O'Leary et al, <sup>79</sup> 2016    | Moderate              | Moderate           | Moderate                                 | Moderate                               | Moderate               | Low                               | Low                                    | Moderate         |
| Sun et al, <sup>82</sup> 2016        | Moderate              | Moderate           | Moderate                                 | Moderate                               | Low                    | Moderate                          | Low                                    | Moderate         |
| de Heer et al, <sup>87</sup> 2017    | Serious               | Serious            | Serious                                  | Moderate                               | Serious                | Low                               | Moderate                               | Serious          |
| Glatz et al, <sup>88</sup> 2017      | Moderate              | Low                | Moderate                                 | Moderate                               | Low                    | Low                               | Low                                    | Moderate         |
| Hu et al, <sup>90</sup> 2017         | Serious               | Low                | Moderate                                 | Moderate                               | Low                    | Low                               | Low                                    | Serious          |
| Ing et al a, <sup>91</sup> 2017      | Moderate              | Low                | Moderate                                 | Moderate                               | Moderate               | Moderate                          | Low                                    | Moderate         |
| Nestor et al, <sup>95</sup> 2017     | Serious               | Moderate           | Moderate                                 | Moderate                               | Moderate               | None                              | Low                                    | Serious          |
| Lv et al, <sup>102</sup> 2018        | Serious               | None               | Moderate                                 | Moderate                               | None                   | Serious                           | Low                                    | Serious          |
| Schneuer et al, <sup>103</sup> 2018  | Serious               | Moderate           | Moderate                                 | Moderate                               | Low                    | Moderate                          | Moderate                               | Serious          |
| Tsai et al, <sup>104</sup> 2018      | Serious               | Low                | Moderate                                 | Moderate                               | Moderate               | Moderate                          | Low                                    | Serious          |
| Warner et al, <sup>105</sup> 2018    | Moderate              | Moderate           | Moderate                                 | Moderate                               | Low                    | Moderate                          | Low                                    | Moderate         |
| Khochfe et al, <sup>107</sup> 2019   | Serious               | Moderate           | Moderate                                 | Moderate                               | None                   | Serious                           | Low                                    | Serious          |
| Kobayashi et al, <sup>120</sup> 2020 | Moderate              | Low                | Moderate                                 | Moderate                               | Moderate               | Moderate                          | Low                                    | Moderate         |

|                                    |          |     |          |          |          |     |     |          |
|------------------------------------|----------|-----|----------|----------|----------|-----|-----|----------|
| Walkden et al, <sup>122</sup> 2020 | Moderate | Low | Moderate | Moderate | Moderate | Low | Low | Moderate |
| Zhou et al, <sup>130</sup> 2021    | Serious  | Low | Low      | Low      | Moderate | Low | Low | Serious  |



**eFigure 1. Domain-Specific Meta-analysis of Scores After Single With Possible Multiple Exposure to Surgery and Anesthesia**

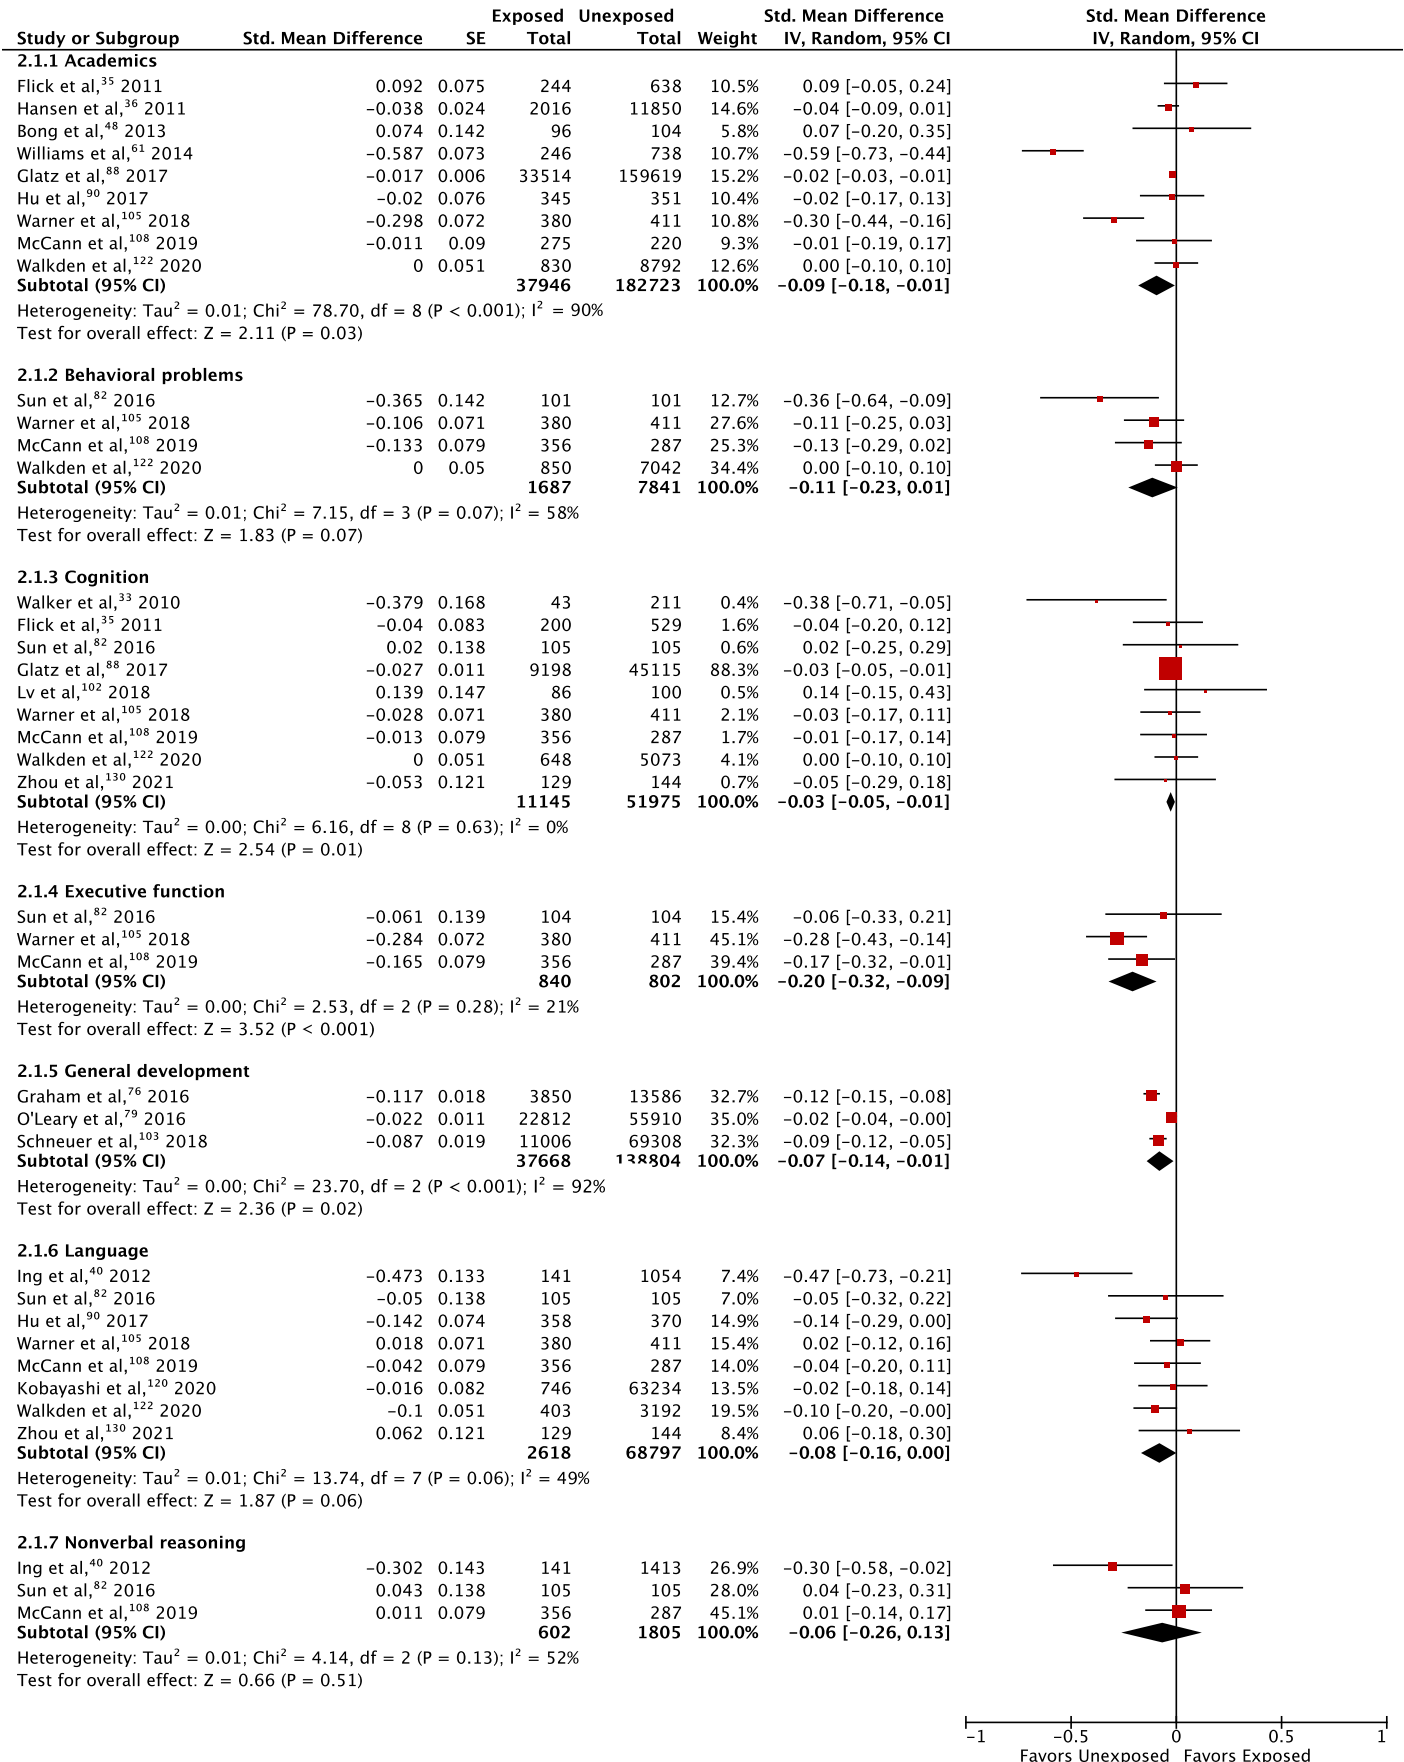

**eFigure 2.** Meta-analysis of Hazard and Risk of Clinical Diagnoses and Symptoms After Single With Possible Multiple Exposure to Surgery and Anesthesia

**A**

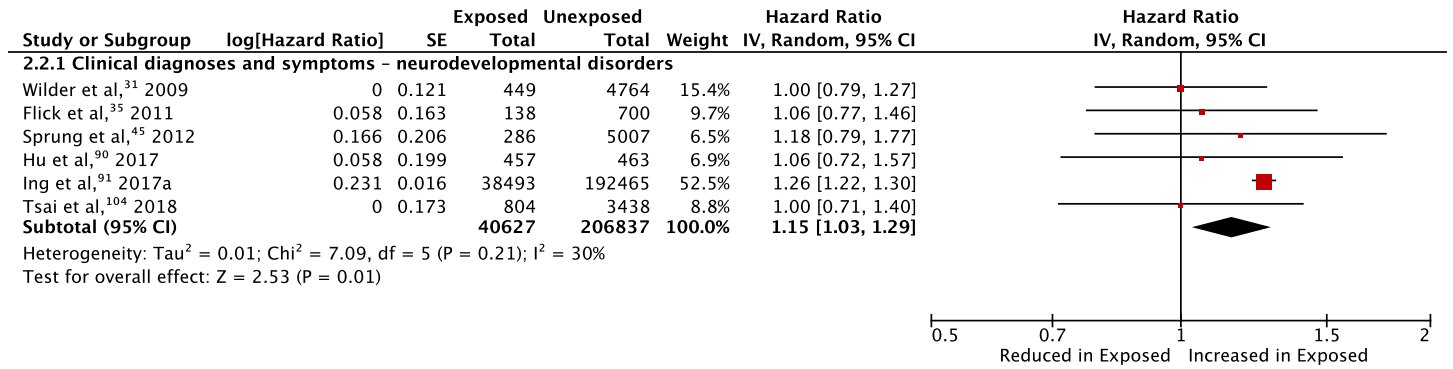

**B**

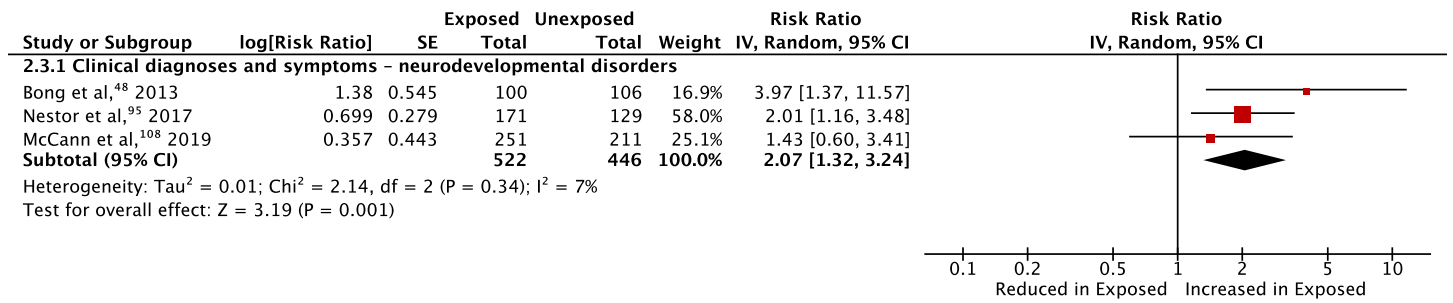

Legend: Panel A: Studies reporting hazard ratios for neurodevelopmental disorder diagnoses after *Single with possible multiple exposure* to surgery and anesthesia. Panel B: Studies reporting odds or risk ratios for neurodevelopmental disorder diagnoses after *Single with possible multiple exposure* to surgery and anesthesia

**eFigure 3. Domain-Specific Meta-analysis of Subdomain Scores and Hazard of ADHD After Single With Possible Multiple Exposure to Surgery and Anesthesia**

A

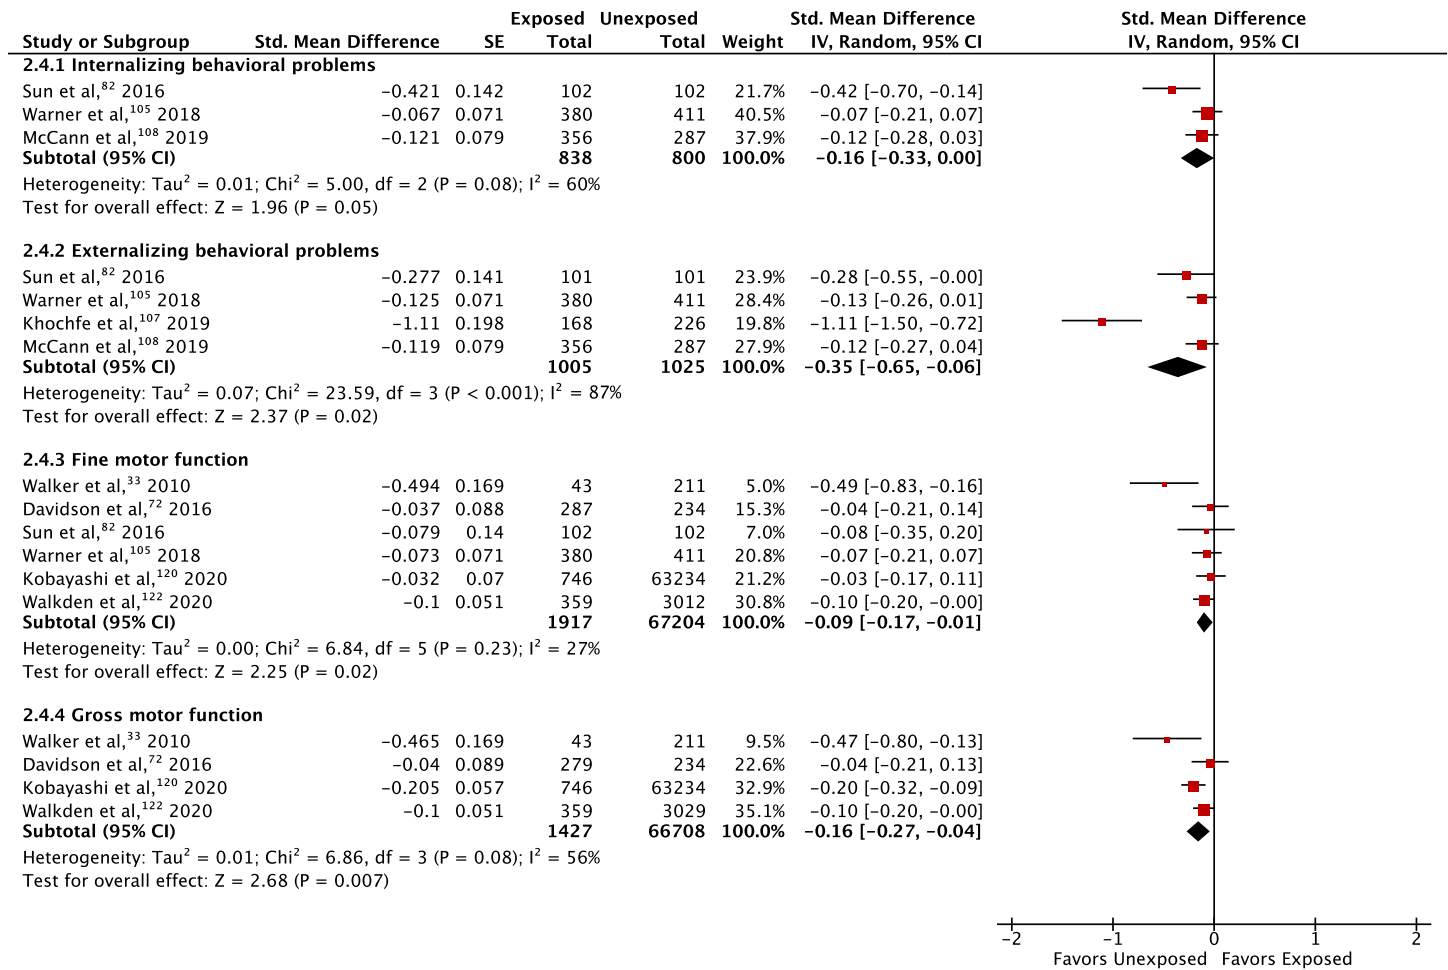

B

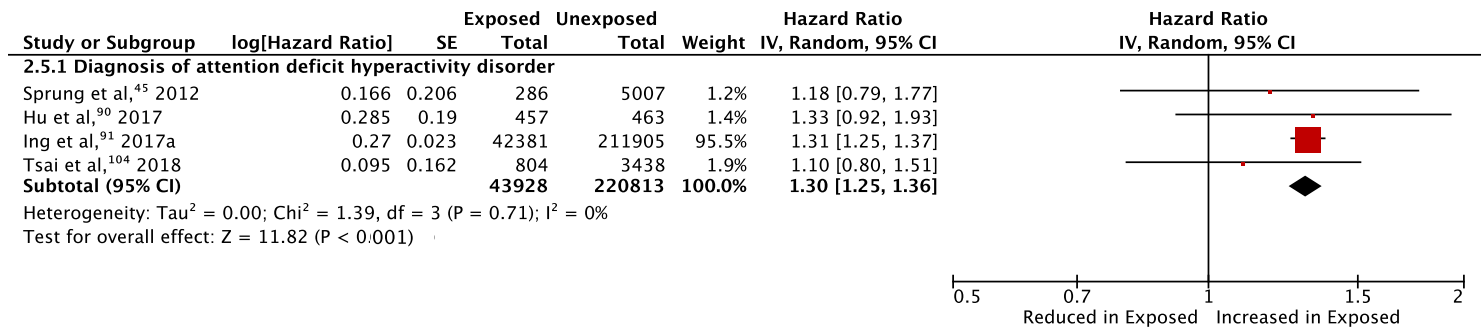

Legend: Panel A: Studies reporting standardized mean differences of subdomains of behavioral and motor problems after *Single with possible multiple exposure* to surgery and anesthesia. Panel B: Studies reporting hazard ratios for ADHD diagnosis after *Single with possible multiple exposure* to surgery and anesthesia

**eFigure 4. Domain-Specific Meta-analysis of Scores and Hazard of Clinical Diagnoses and Symptoms After Single Exposure to Surgery and Anesthesia**

**A**

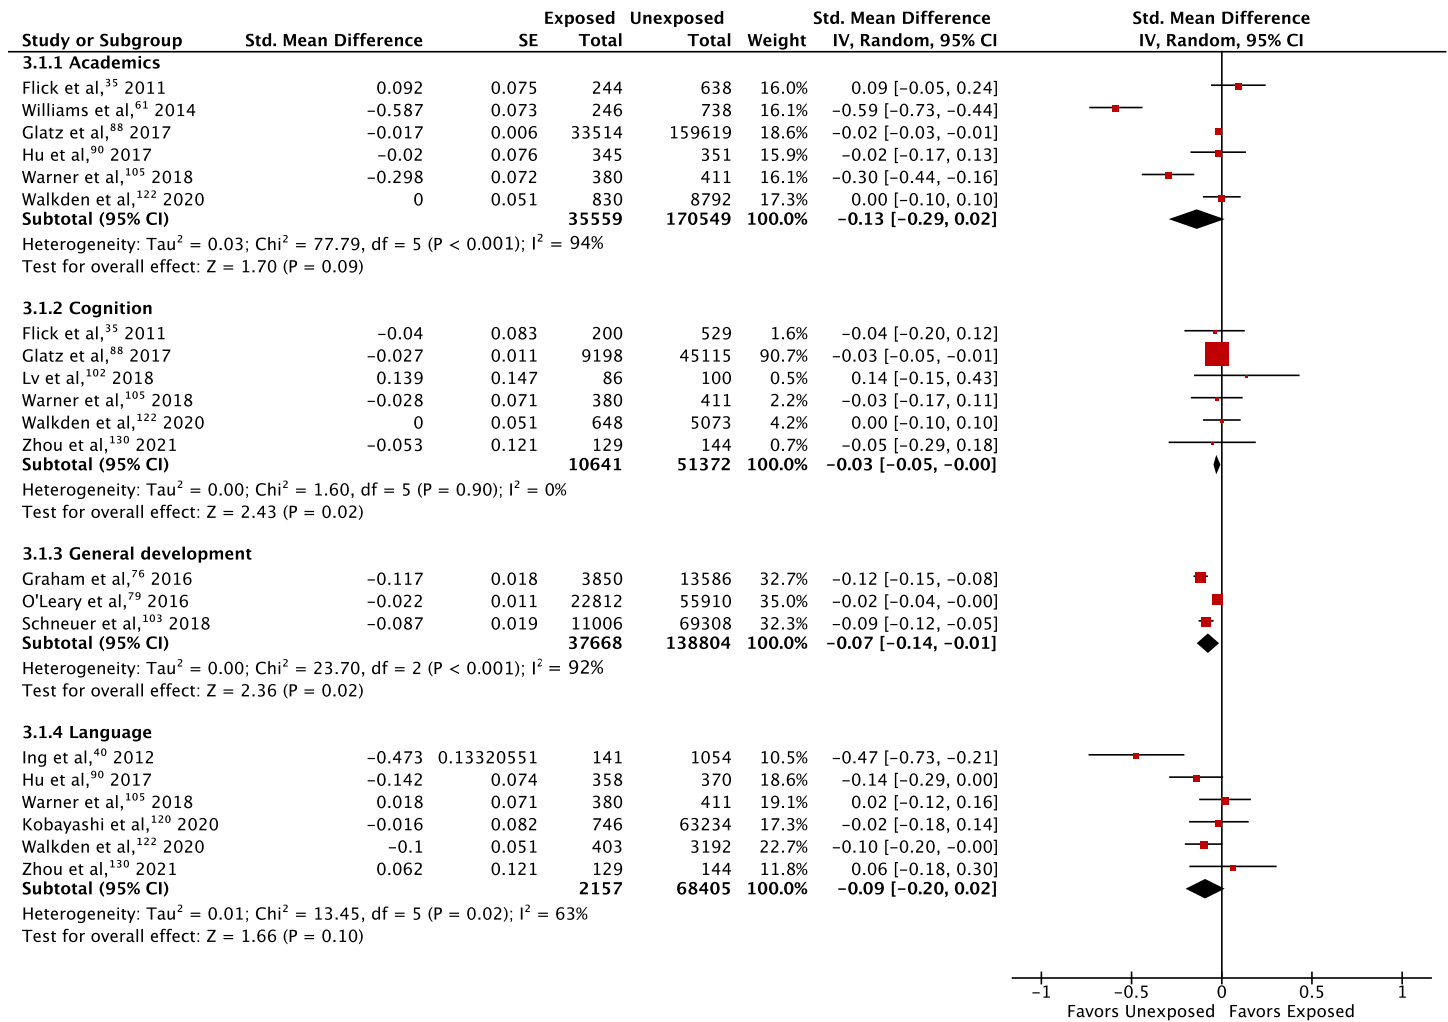

**B**

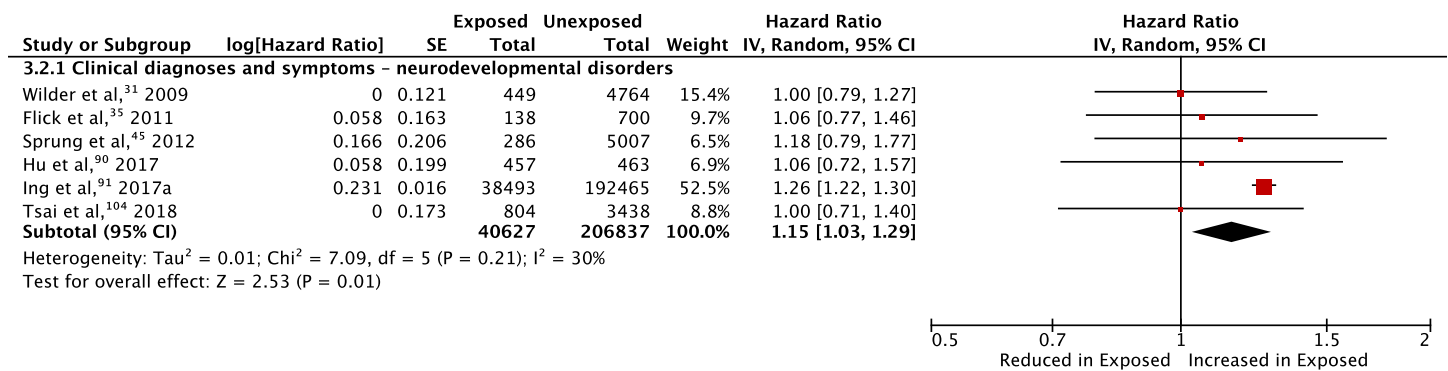

Legend: Panel A: Studies reporting standardized mean differences of domain scores after Single exposure to surgery and anesthesia. Panel B: Studies reporting hazard ratios for neurodevelopmental disorder diagnoses after Single exposure to surgery and anesthesia

**eFigure 5. Domain-Specific Meta-analysis of Subdomain Scores and Hazard of ADHD After Single Exposure to Surgery and Anesthesia**

**A**

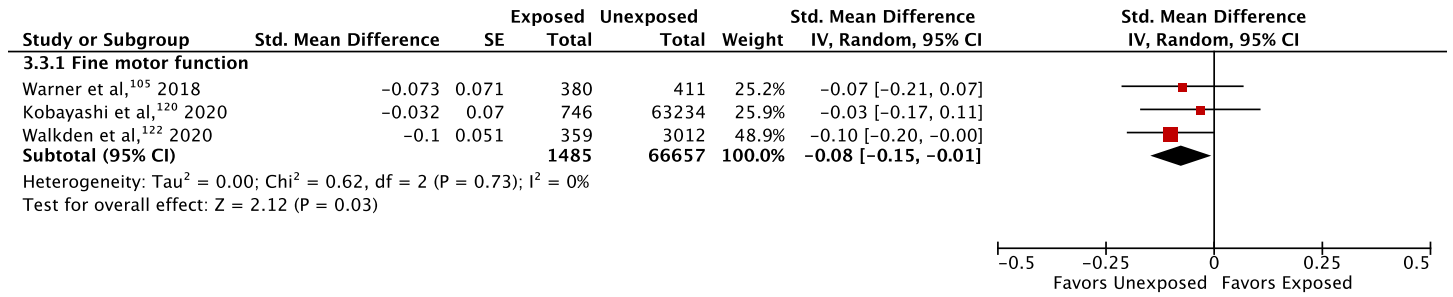

**B**

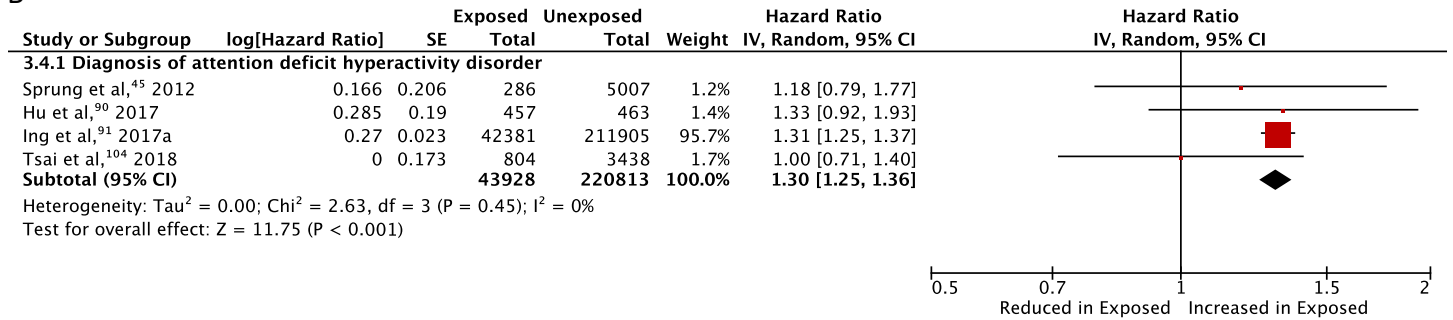

Legend: Panel A: Studies reporting standardized mean differences of subdomains of motor problems after *Single exposure* to surgery and anesthesia. Panel B: Studies reporting hazard ratios for ADHD diagnosis after *Single exposure* to surgery and anesthesia

**eFigure 6. Domain-Specific Meta-analysis of Scores and Hazard of Clinical Diagnoses and Symptoms After Multiple Exposure to Surgery and Anesthesia**

A

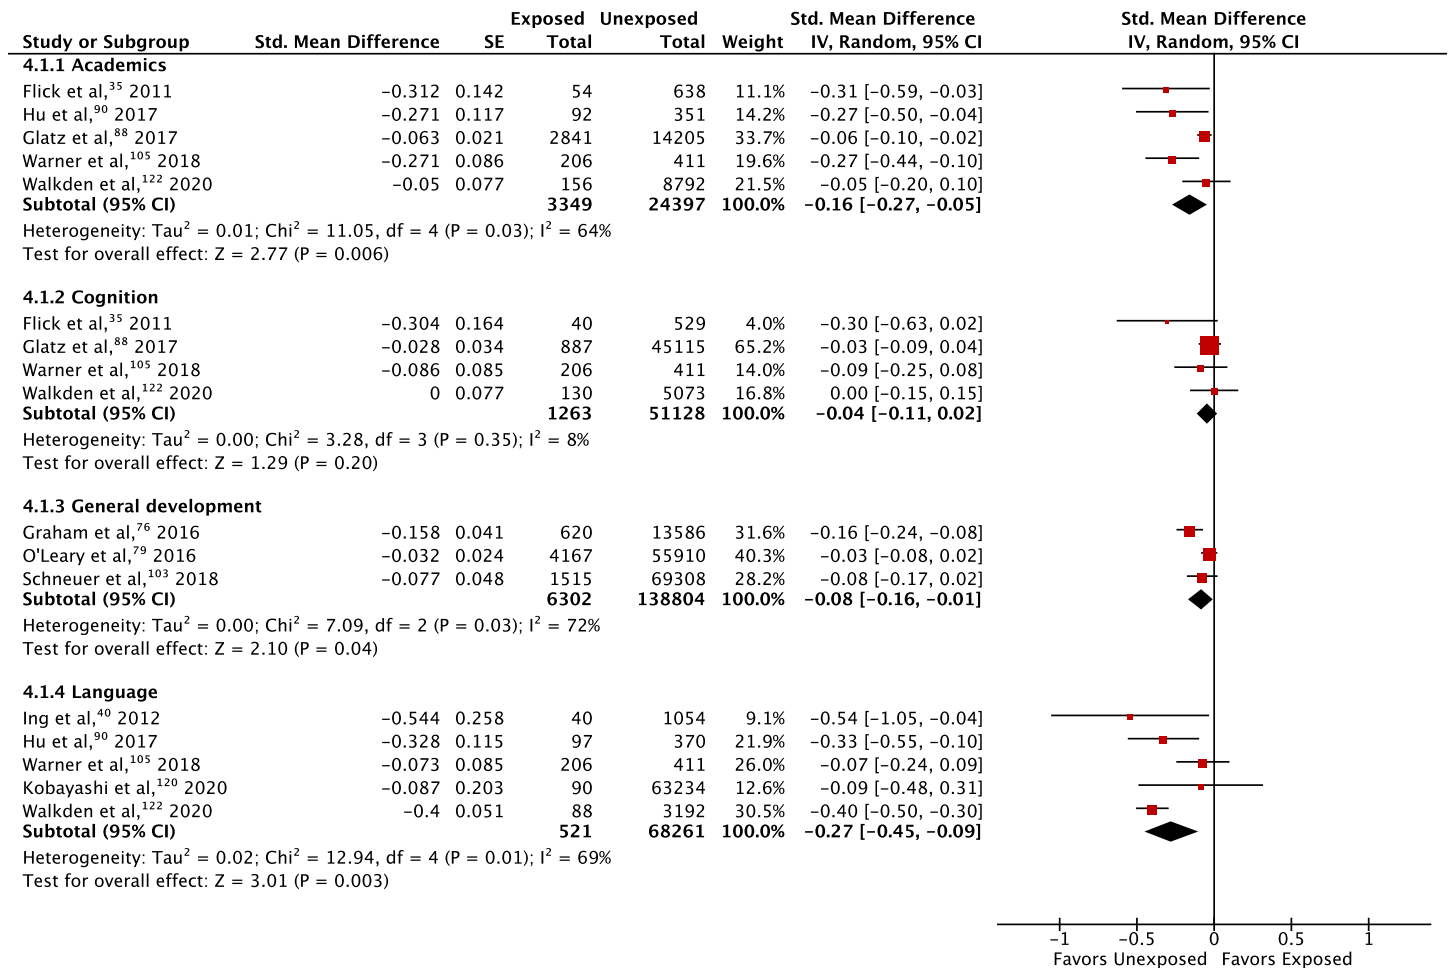

B

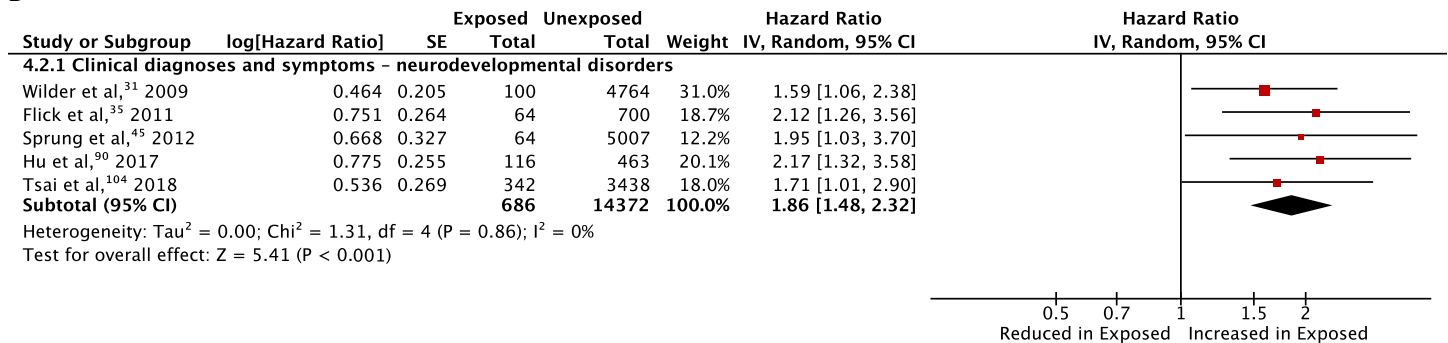

Legend: Panel A: Studies reporting standardized mean differences of domain scores after *Multiple exposure* to surgery and anesthesia. Panel B: Studies reporting hazard ratios for neurodevelopmental disorder diagnoses after *Multiple exposure* to surgery and anesthesia

**eFigure 7.** Domain-Specific Meta-analysis of Subdomain Scores and Hazard of ADHD After Multiple Exposure to Surgery and Anesthesia

A

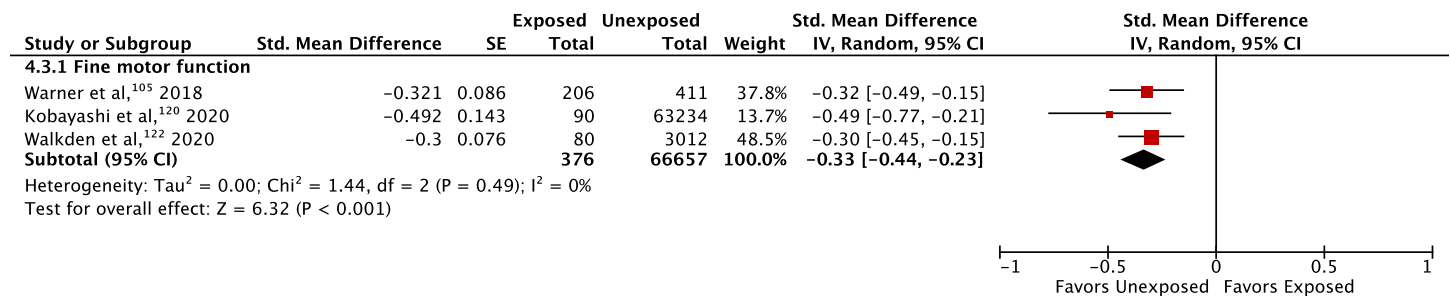

B

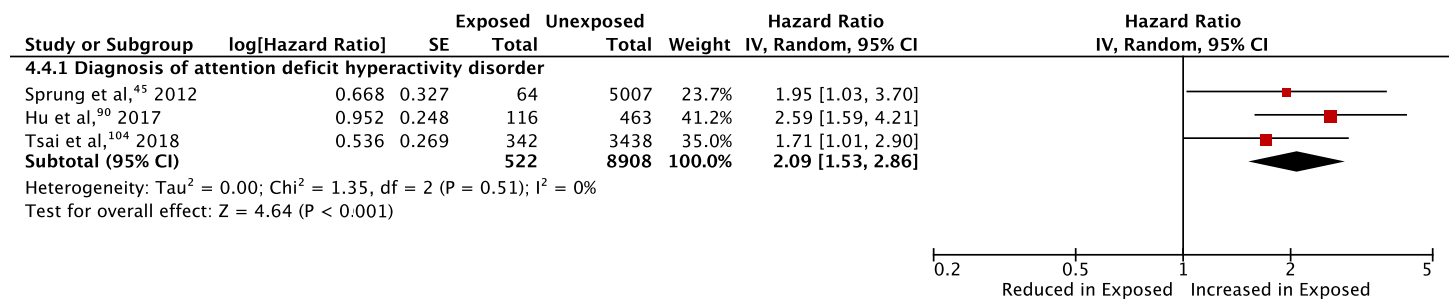

Legend: Panel A: Studies reporting standardized mean differences of subdomains of motor problems after *Multiple exposure* to surgery and anesthesia. Panel B: Studies reporting hazard ratios for ADHD diagnosis after *Multiple exposure* to surgery and anesthesia

**eFigure 8.** ROBINS-I Risk of Bias Assessment Figure

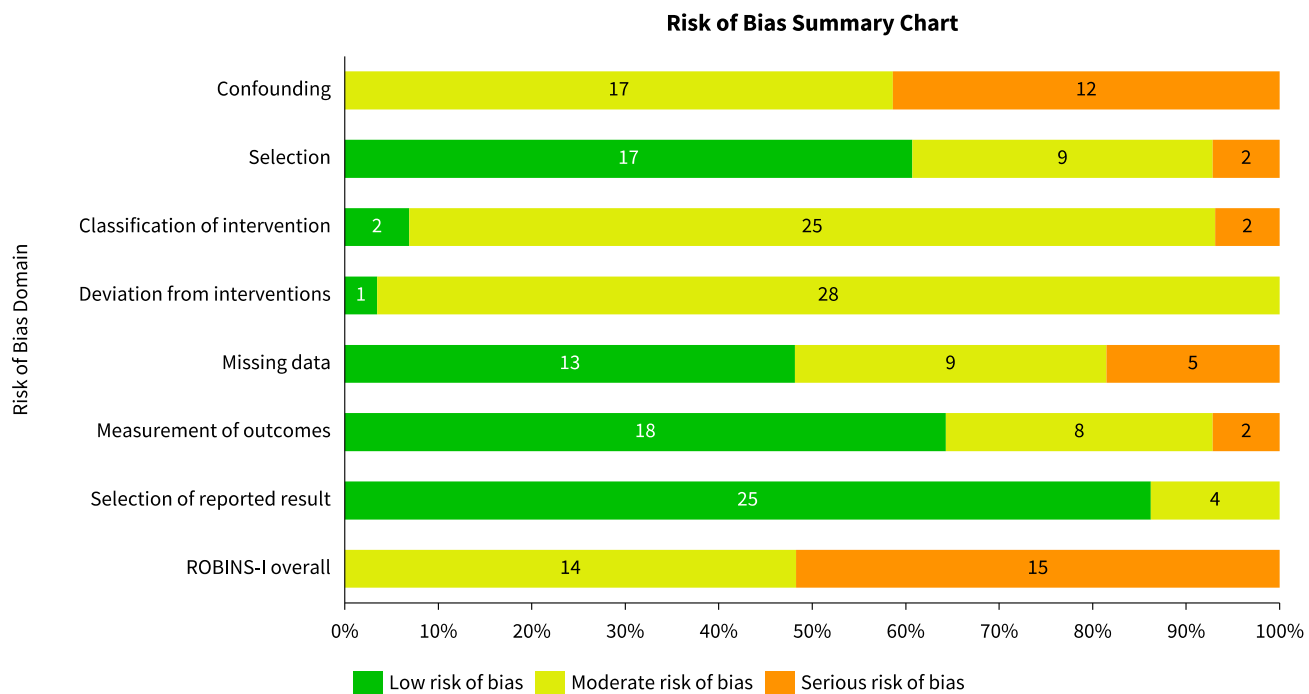

Legend: Summary chart showing number of studies with low, moderate, or serious risk of bias for each of seven domains as well as overall score in ROBINS-I assessment



**eFigure 9.** Funnel Plot for Studies of Any Exposure to Surgery and Anesthesia

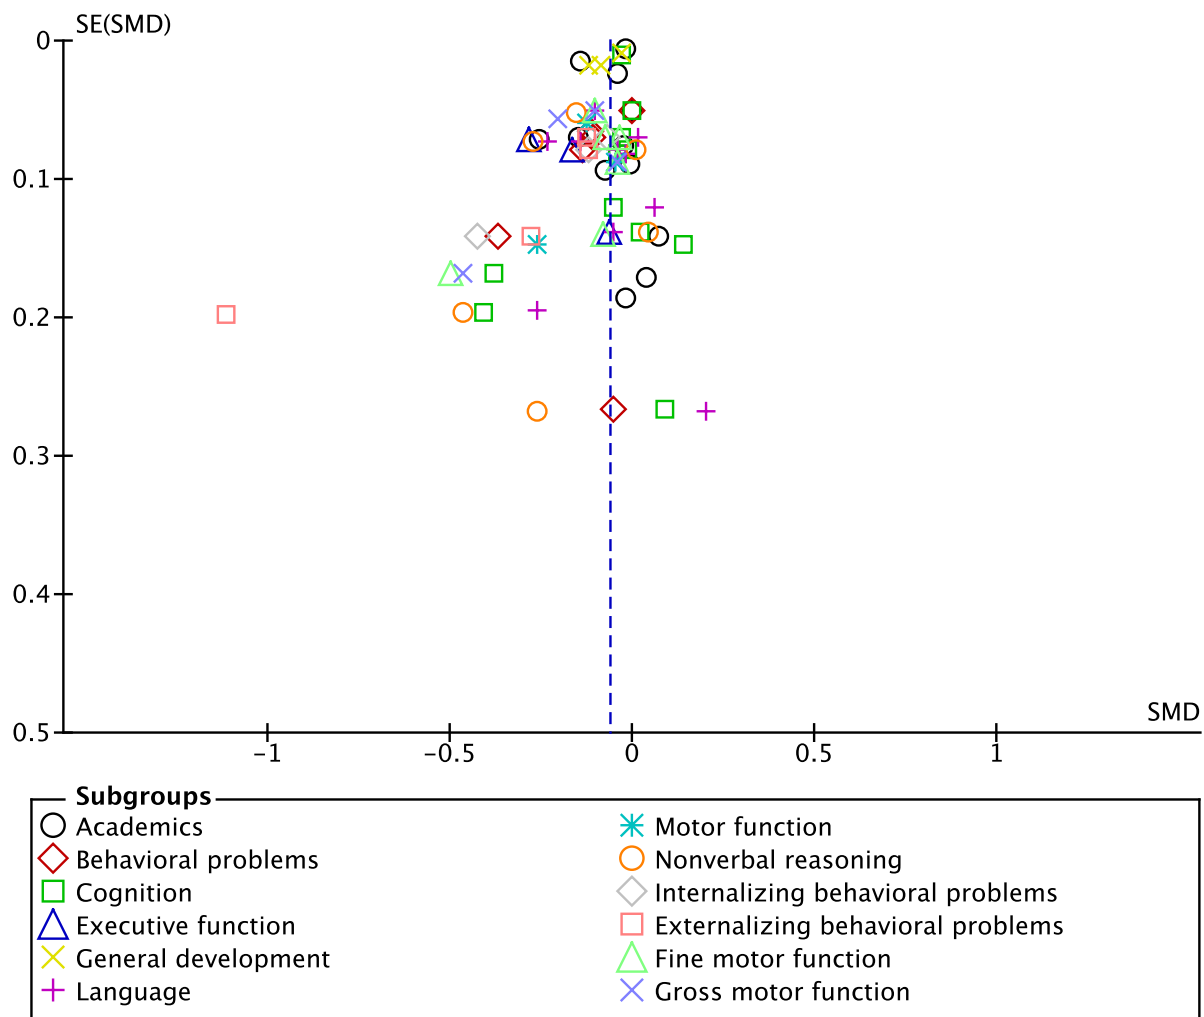

Supplement: jamanetwopen-e2217427-s001.pdf [file jamanetwopen-e2217427-s001.pdf]
